# Supplementary material
Source: PubMed Central journal article supplement (PMC3448786)

# **Catalytic Coupling of Arene C-H Bonds and Alkynes for the Synthesis of Coumarins: the Substrate Scope and Application to the Development of Neuroimaging Agents**

Paul A. Vadola and Dalibor Sames\*

*Department of Chemistry, Columbia University,  
3000 Broadway, New York, New York, 10027*

## **NMR Spectra**

| <b>Compound.</b>                                                                                                          | <b>Proton Spectrum</b> | <b>Carbon Spectrum</b> |
|---------------------------------------------------------------------------------------------------------------------------|------------------------|------------------------|
| <b>3-(2-(<i>tert</i>-butoxycarbonylamino)ethyl)-1<i>H</i>-indol-5-yl but-2-ynoate (8).</b>                                | <b>5</b>               | <b>6</b>               |
| <b><i>tert</i>-butyl-9-methyl-pyrano[3,2-<i>e</i>]indol-7(3<i>H</i>)-one-1-ethylcarbamate (9)</b>                         | <b>7</b>               | <b>8</b>               |
| <b>1<i>H</i>-indol-5-yl but-2-ynoate (10).</b>                                                                            | <b>9</b>               | <b>10</b>              |
| <b>9-methyl-pyrano[3,2-<i>e</i>]indol-7(3<i>H</i>)-one (11)</b>                                                           | <b>11</b>              | <b>12</b>              |
| <b>3-(2-(<i>tert</i>-butoxycarbonylamino)ethyl)-1<i>H</i>-indol-5-yl 3-phenylprop-2-ynoate (15).</b>                      | <b>13</b>              | <b>14</b>              |
| <b><i>tert</i>-butyl-9-phenyl-pyrano[3,2-<i>e</i>]indol-7(3<i>H</i>)-one-1-ethylcarbamate (14)</b>                        | <b>15</b>              | <b>16</b>              |
| <b>3-(2-(<i>tert</i>-butoxycarbonylamino)-3-methoxy-3-oxopropyl)-1<i>H</i>-indol-5-yl but-2-ynoate (16)</b>               | <b>17</b>              | <b>18</b>              |
| <b>1-(2-(<i>tert</i>-butoxycarbonylamino)-methyl-propanoate)-9-methyl-pyrano[3,2-<i>e</i>]indol-7(3<i>H</i>)-one (17)</b> | <b>19</b>              | <b>20</b>              |
| <b>3-(<i>tert</i>-butoxycarbonylamino)phenyl but-2-ynoate (18)</b>                                                        | <b>21</b>              | <b>22</b>              |
| <b><i>tert</i>-butyl 4-methyl-2-oxo-2<i>H</i>-chromen-7-ylcarbamate (19)</b>                                              | <b>23</b>              | <b>24</b>              |
| <b><i>tert</i>-butyl 4-methyl-2-oxo-2<i>H</i>-chromen-5-ylcarbamate (20)</b>                                              | <b>25</b>              | <b>26</b>              |
| <b>3-aminophenyl but-2-ynoate (21).</b>                                                                                   | <b>27</b>              | <b>28</b>              |
| <b>7-amino-4-methyl-2<i>H</i>-chromen-2-one (22)</b>                                                                      | <b>29</b>              | <b>30</b>              |
| <b>29,30. 5-amino-4-methyl-2<i>H</i>-chromen-2-one (23)</b>                                                               | <b>31</b>              | <b>32</b>              |

|                                                                                                                                                               |    |    |
|---------------------------------------------------------------------------------------------------------------------------------------------------------------|----|----|
| <i>tert</i> -butyl-4-(3-(but-2-ynoiloxy)phenyl)piperazine-1-carboxylate (24)                                                                                  | 33 | 34 |
| <i>tert</i> -butyl 4-(4-methyl-2-oxo-2 <i>H</i> -chromen-7-yl)piperazine-1-carboxylate (25)                                                                   | 35 | 36 |
| <i>tert</i> -butyl 4-(4-methyl-2-oxo-2 <i>H</i> -chromen-5-yl)piperazine-1-carboxylate (26)                                                                   | 37 | 38 |
| 8-(2,3,6,7-tetrahydro-1 <i>H</i> ,5 <i>H</i> -benzo[ <i>ij</i> ]quinolizine)-but-2-ynoate (27)                                                                | 39 | 40 |
| 2,3,6,7-tetrahydro-9-methyl-1 <i>H</i> ,5 <i>H</i> ,11 <i>H</i> -[1]benzopyrano[6,7,8- <i>ij</i> ]quinolizin-11-one (28)                                      | 41 | 42 |
| 9 <i>H</i> -carbazol-2-yl but-2-ynoate (29)                                                                                                                   | 43 | 44 |
| 4-methyl-pyrano[2,3- <i>a</i> ]carbazol-2(5 <i>H</i> )-one (30)                                                                                               | 45 | 46 |
| 4-methyl-pyrano[2,3- <i>b</i> ]carbazol-2(10 <i>H</i> )-one (31)                                                                                              | 47 | 48 |
| 5-( <i>tert</i> -butoxycarbonylamino)pent-2-ynoic acid (33).                                                                                                  | 49 | 50 |
| 8-(2,3,6,7-tetrahydro-1 <i>H</i> ,5 <i>H</i> -benzo[ <i>ij</i> ]quinolizine)-(5-( <i>tert</i> -butoxycarbonylamino)pent-2-ynoate) (34)                        | 51 | 52 |
| 2,3,6,7-tetrahydro-9-(ethyl-2- <i>tert</i> -butoxycarbonylamino)-1 <i>H</i> ,5 <i>H</i> ,11 <i>H</i> -[1]benzopyrano[6,7,8- <i>ij</i> ]quinolizin-11-one (35) | 53 | 54 |
| FFN511 (TFA salt)                                                                                                                                             | 55 | 56 |
| FFN511                                                                                                                                                        | 57 | 58 |
| 8-(2,3,6,7-tetrahydro-1 <i>H</i> ,5 <i>H</i> -benzo[ <i>ij</i> ]quinolizine)-(5-( <i>tert</i> -butoxycarbonylamino)hex-2-ynoate) (36)                         | 59 | 60 |

|                                                                                                                                                                    |    |    |
|--------------------------------------------------------------------------------------------------------------------------------------------------------------------|----|----|
| 2,3,6,7-tetrahydro-9-(propyl-2- <i>tert</i> -butoxycarbonylamino)-1 <i>H</i> ,5 <i>H</i> ,11 <i>H</i> -<br>[1]benzopyrano[6,7,8- <i>ij</i> ]quinolizin-11-one (37) | 61 | 62 |
| 8-(2,3,6,7-tetrahydro-1 <i>H</i> ,5 <i>H</i> -benzo[ <i>ij</i> ]quinolizine)-(4-( <i>tert</i> -<br>butoxycarbonylamino)but-2-ynoate) (38)                          | 63 | 64 |
| 2,3,6,7-tetrahydro-9-(methyl- <i>tert</i> -butoxycarbonylamino)-1 <i>H</i> ,5 <i>H</i> ,11 <i>H</i> -<br>[1]benzopyrano[6,7,8- <i>ij</i> ]quinolizin-11-one (39)   | 65 | 66 |
| 1-allyl-1,2,3,4-tetrahydroquinolin-7-yl 5-( <i>tert</i> -<br>butoxycarbonylamino)pent-2-ynoate (40)                                                                | 67 | 68 |
| 6,7,8,9-tetrahydro-2-oxo-4-(ethyl- <i>tert</i> -butoxycarbonylamino)-9-(2-<br>propen-1-yl)-2 <i>H</i> -pyrano[3,2- <i>g</i> ]quinoline (41)                        | 69 | 70 |
| 1-allyl-1,2,3,4-tetrahydroquinolin-7-yl 5-( <i>tert</i> -butoxycarbonylamino)hex-<br>2-ynoate (42)                                                                 | 71 | 72 |
| 6,7,8,9-tetrahydro-2-oxo-4-(propyl-2- <i>tert</i> -butoxycarbonylamino)-9-(2-<br>propen-1-yl)-2 <i>H</i> -pyrano[3,2- <i>g</i> ]quinoline (43)                     | 73 | 74 |
| 1-allyl-1,2,3,4-tetrahydroquinolin-5-yl 5-( <i>tert</i> -<br>butoxycarbonylamino)pent-2-ynoate (44)                                                                | 75 | 76 |
| 7,8,9,10-tetrahydro-2-oxo-4-(ethyl- <i>tert</i> -butoxycarbonylamino)-7-(2-<br>propen-1-yl)-2 <i>H</i> -pyrano[3,2- <i>f</i> ]quinoline (45)                       | 77 | 78 |
| PV139 (TFA salt)                                                                                                                                                   | 79 | 80 |

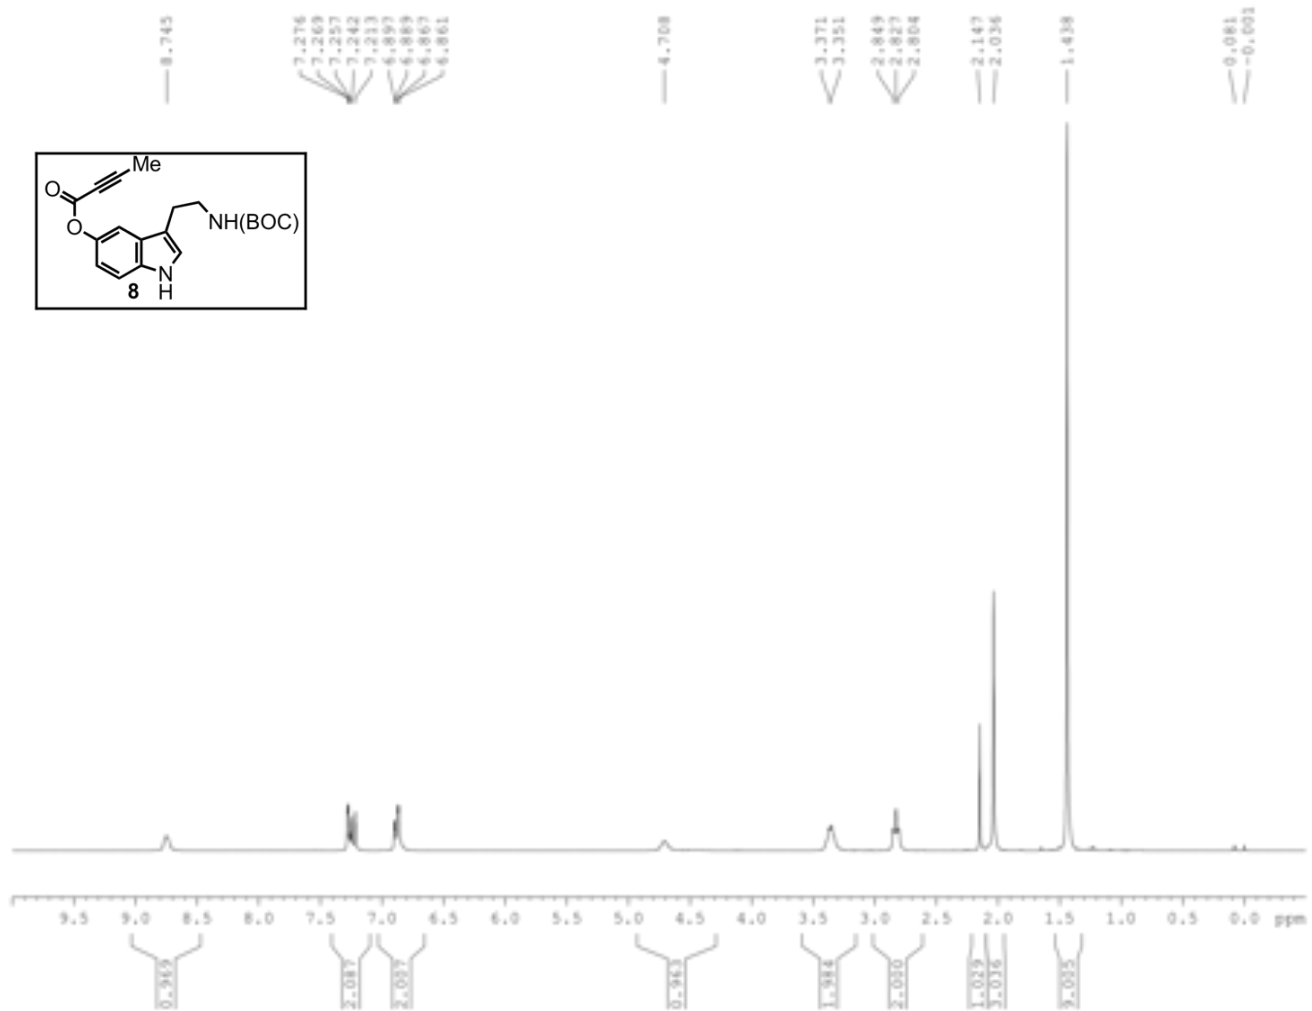

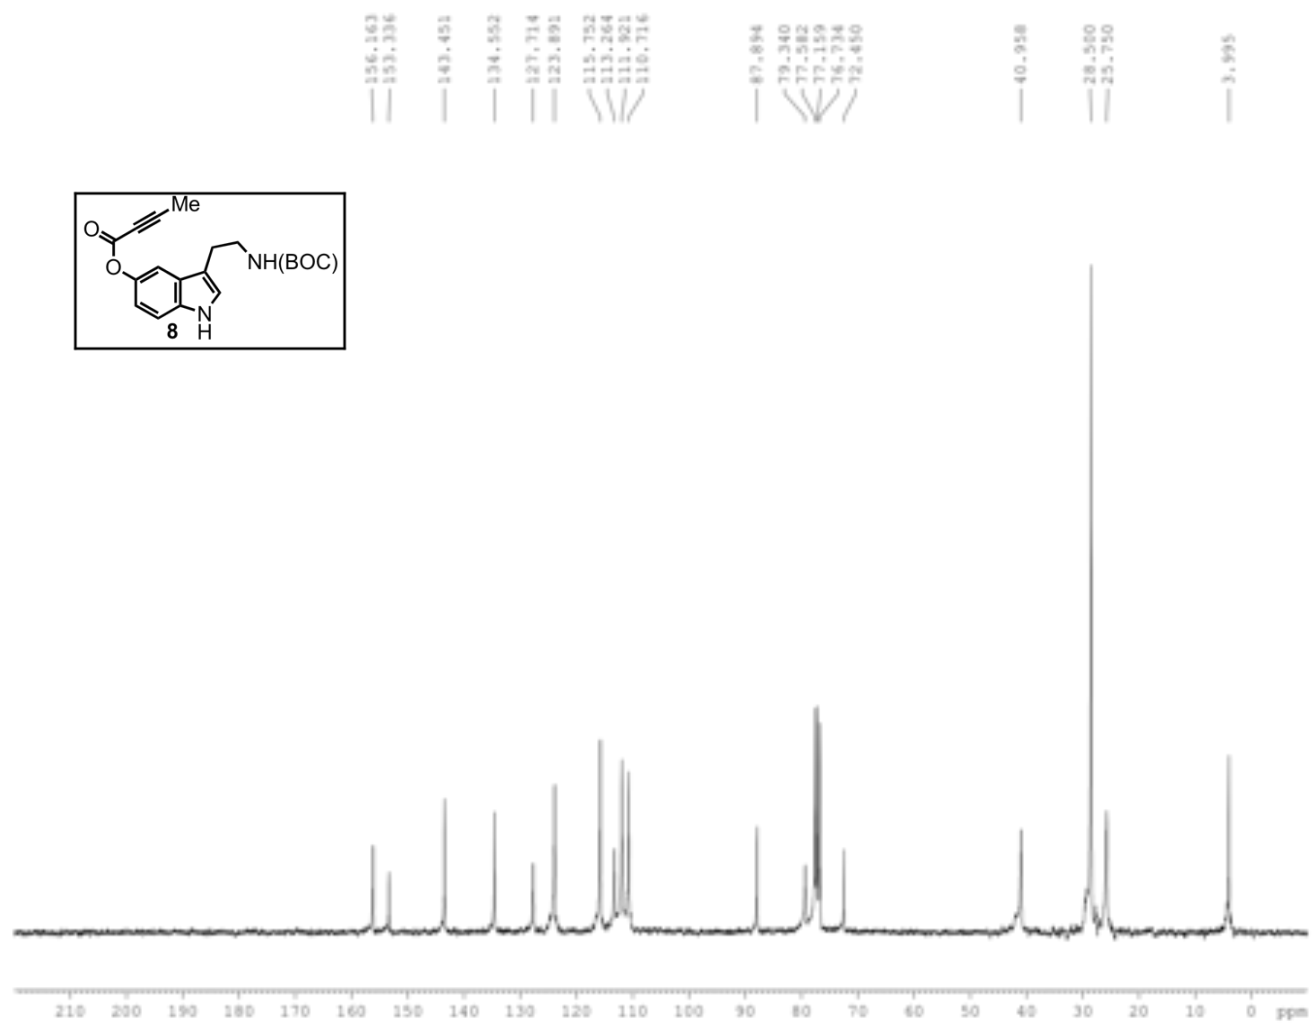

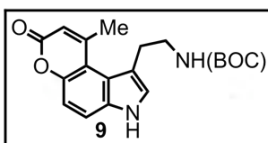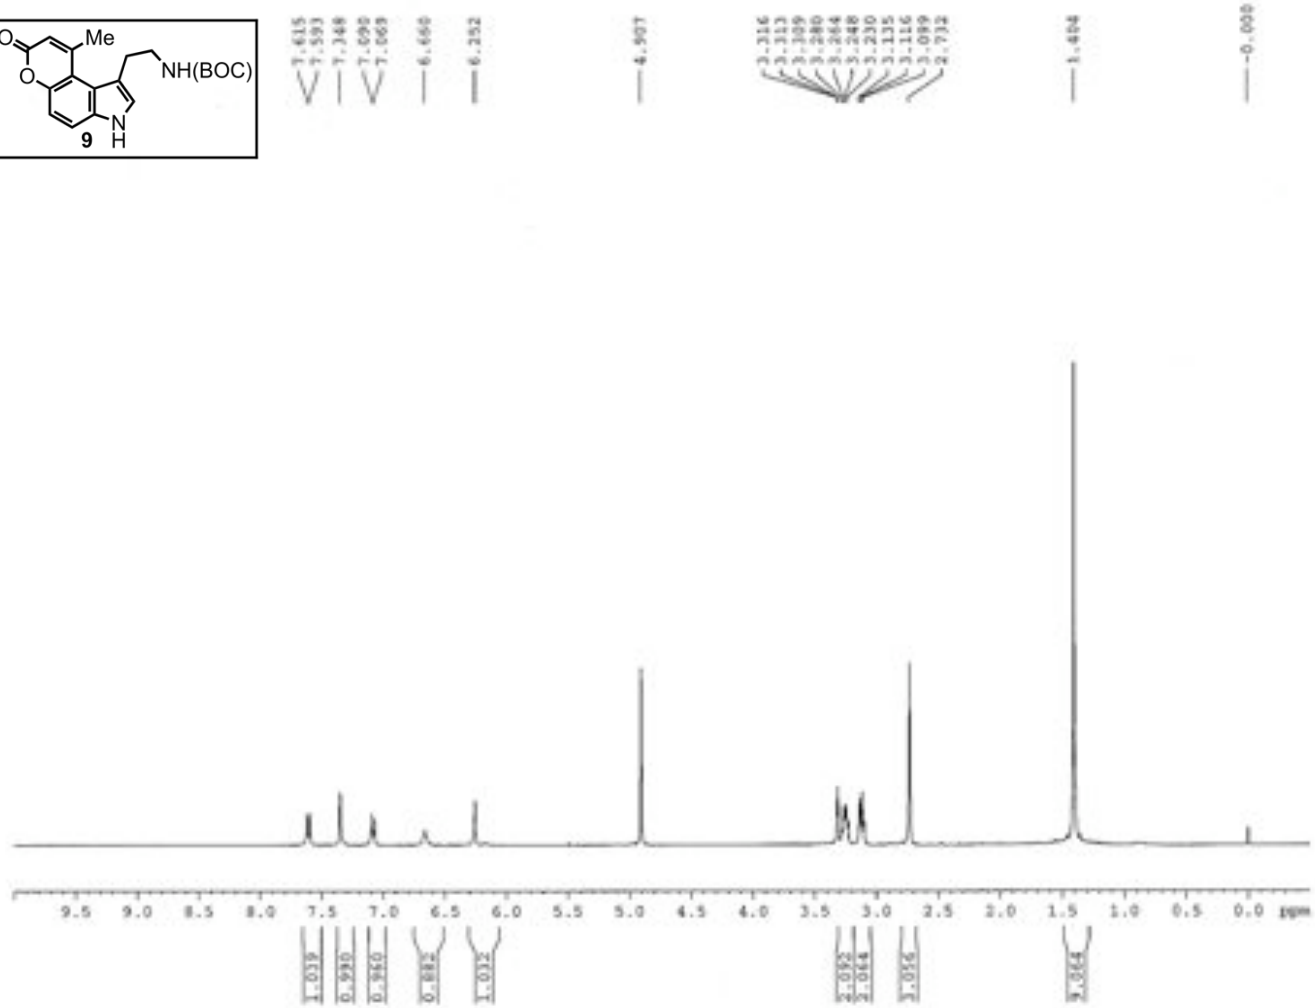

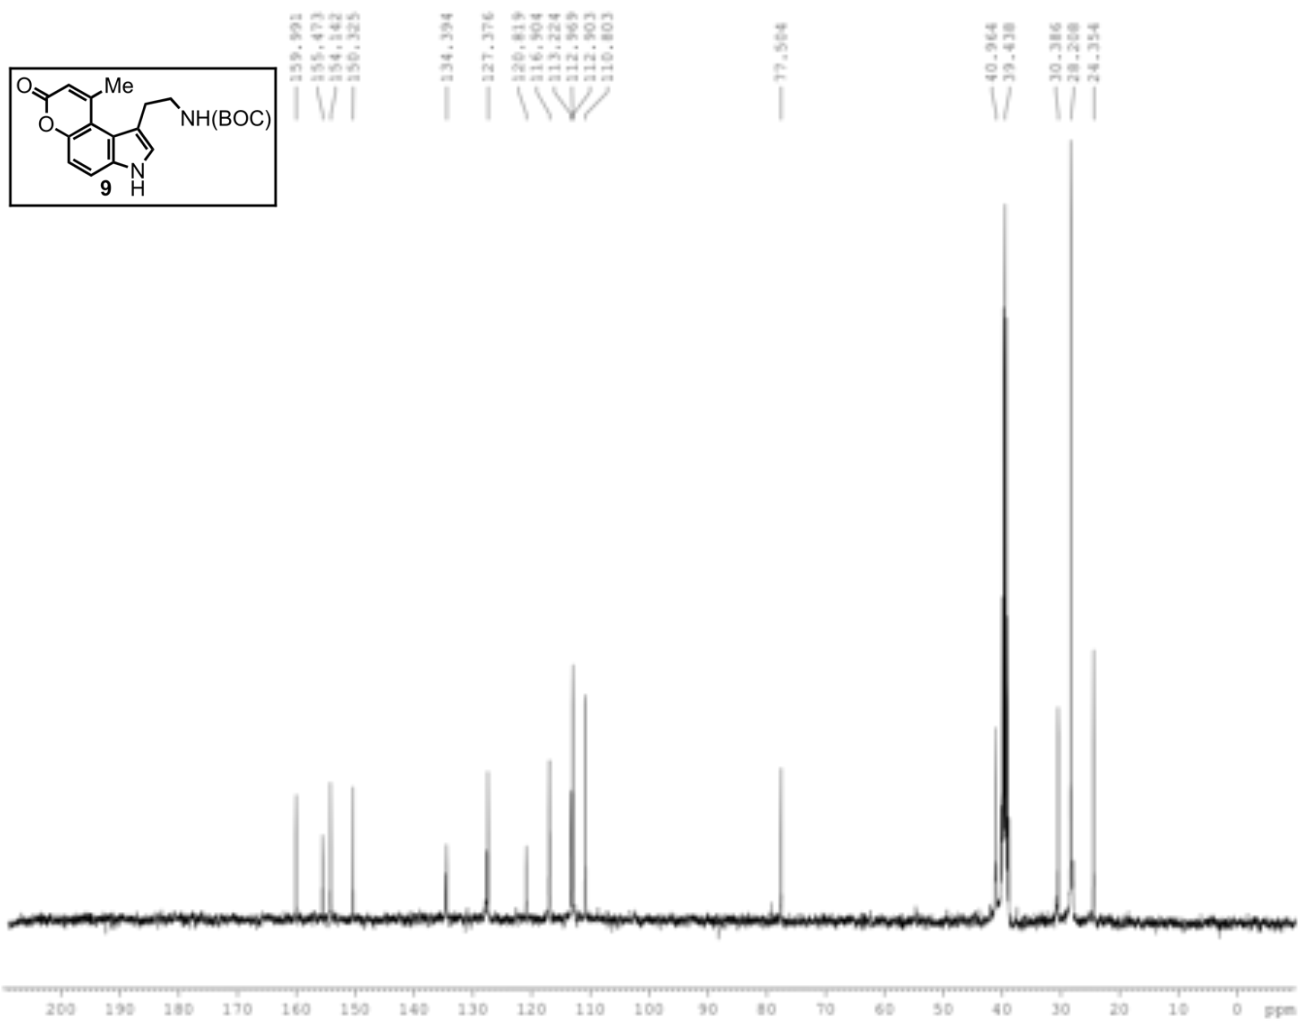



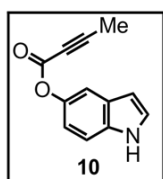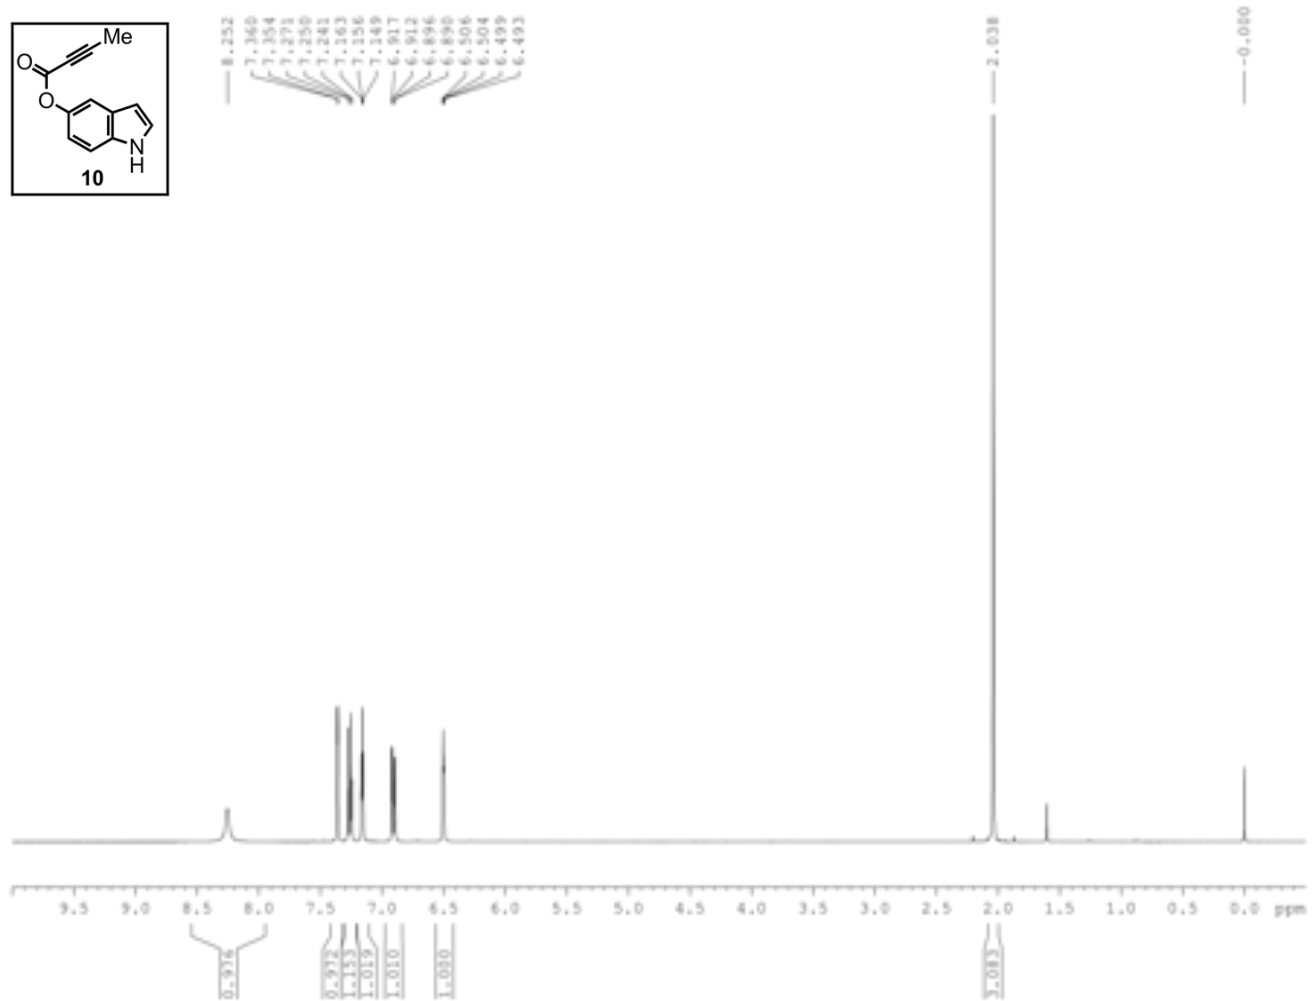

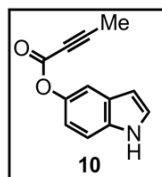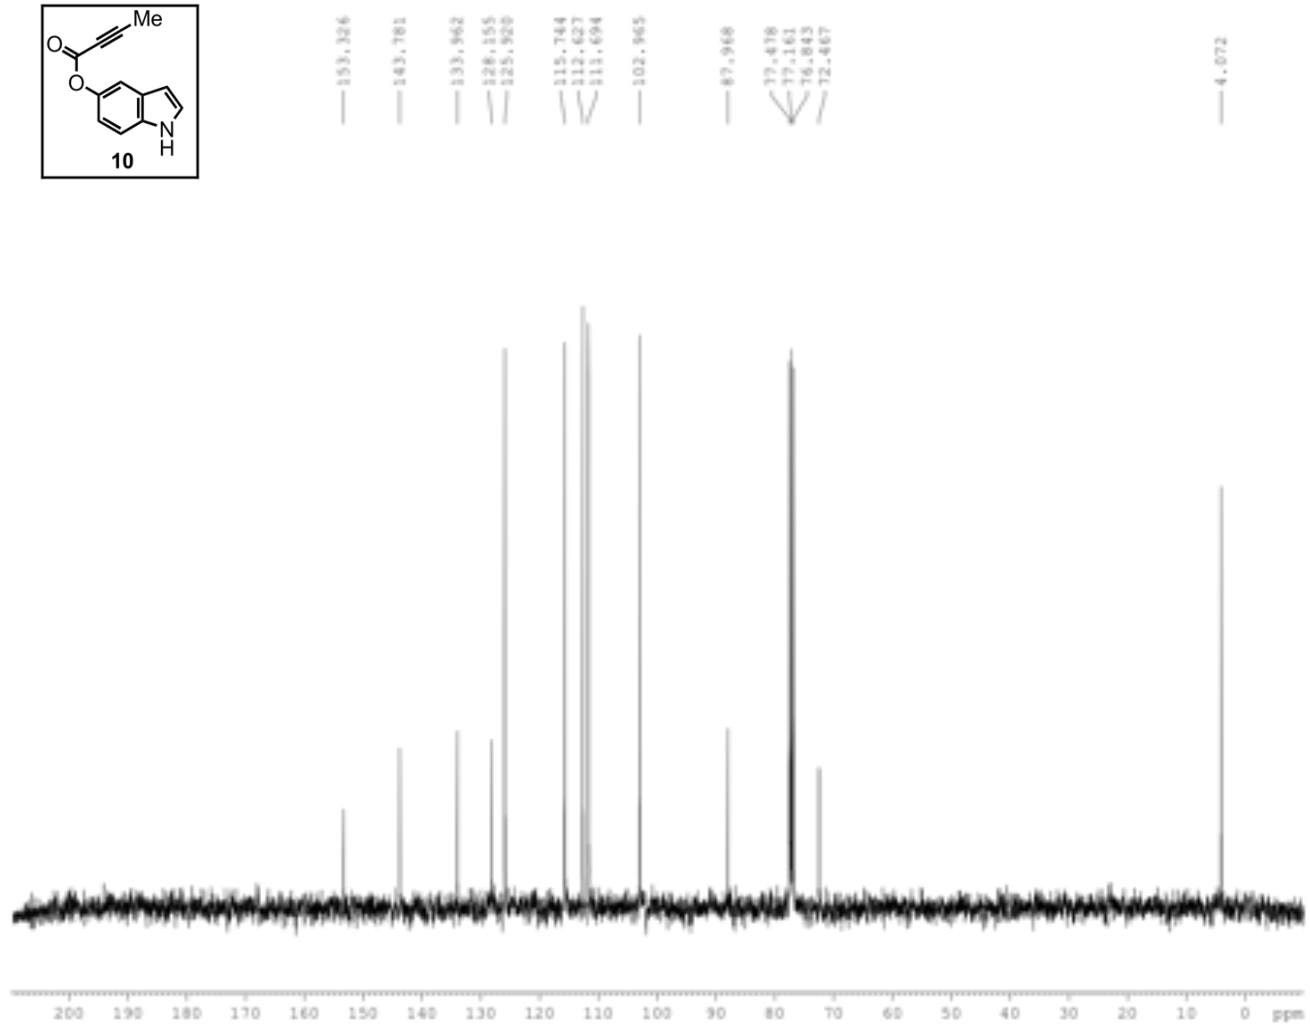

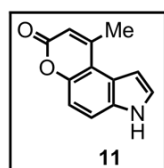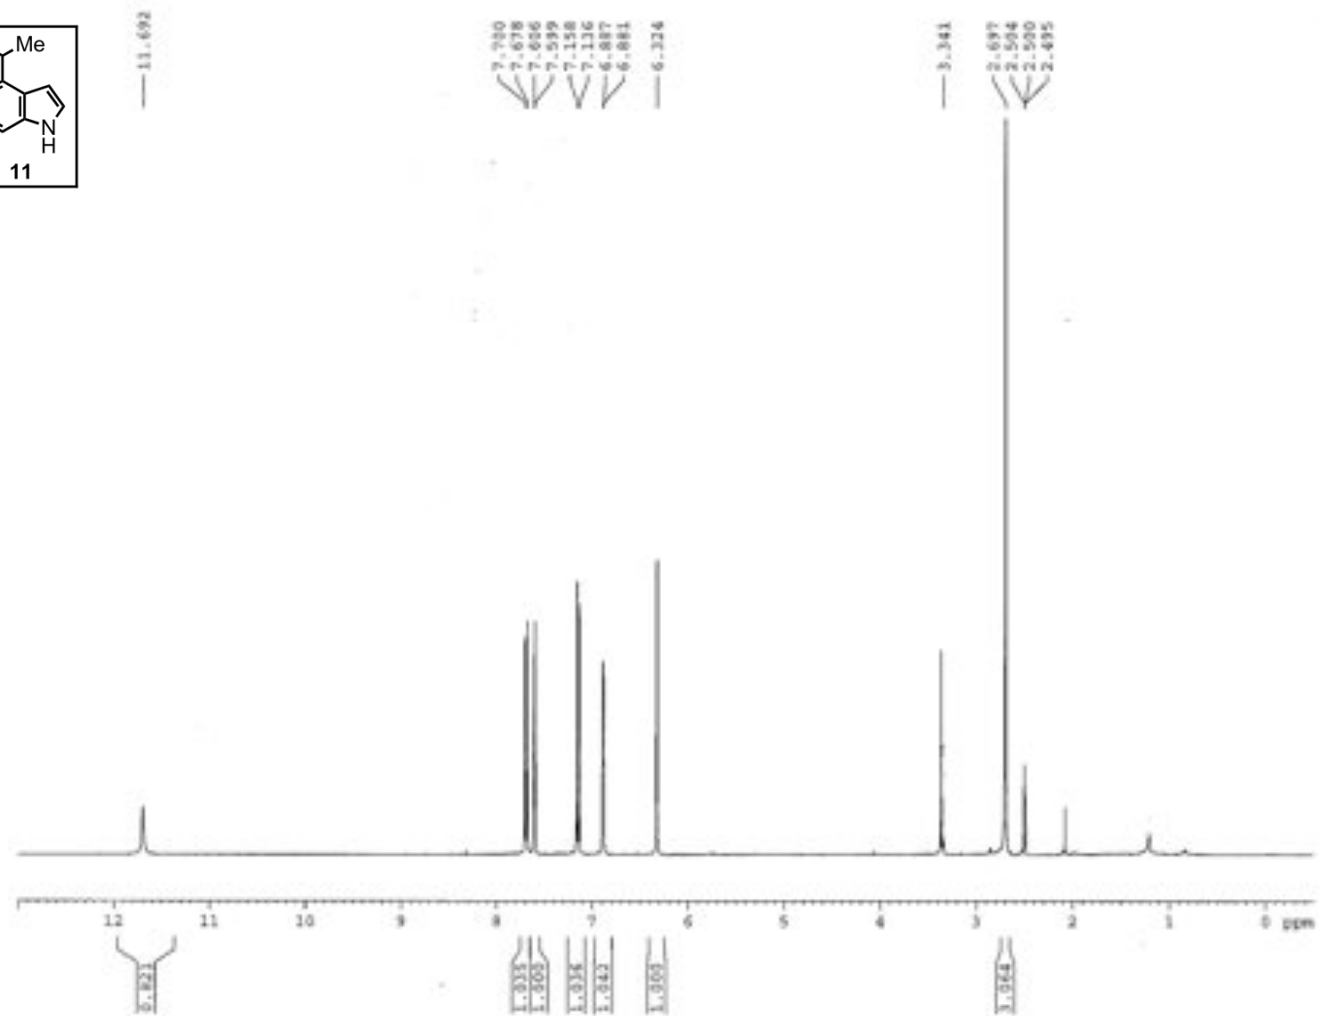

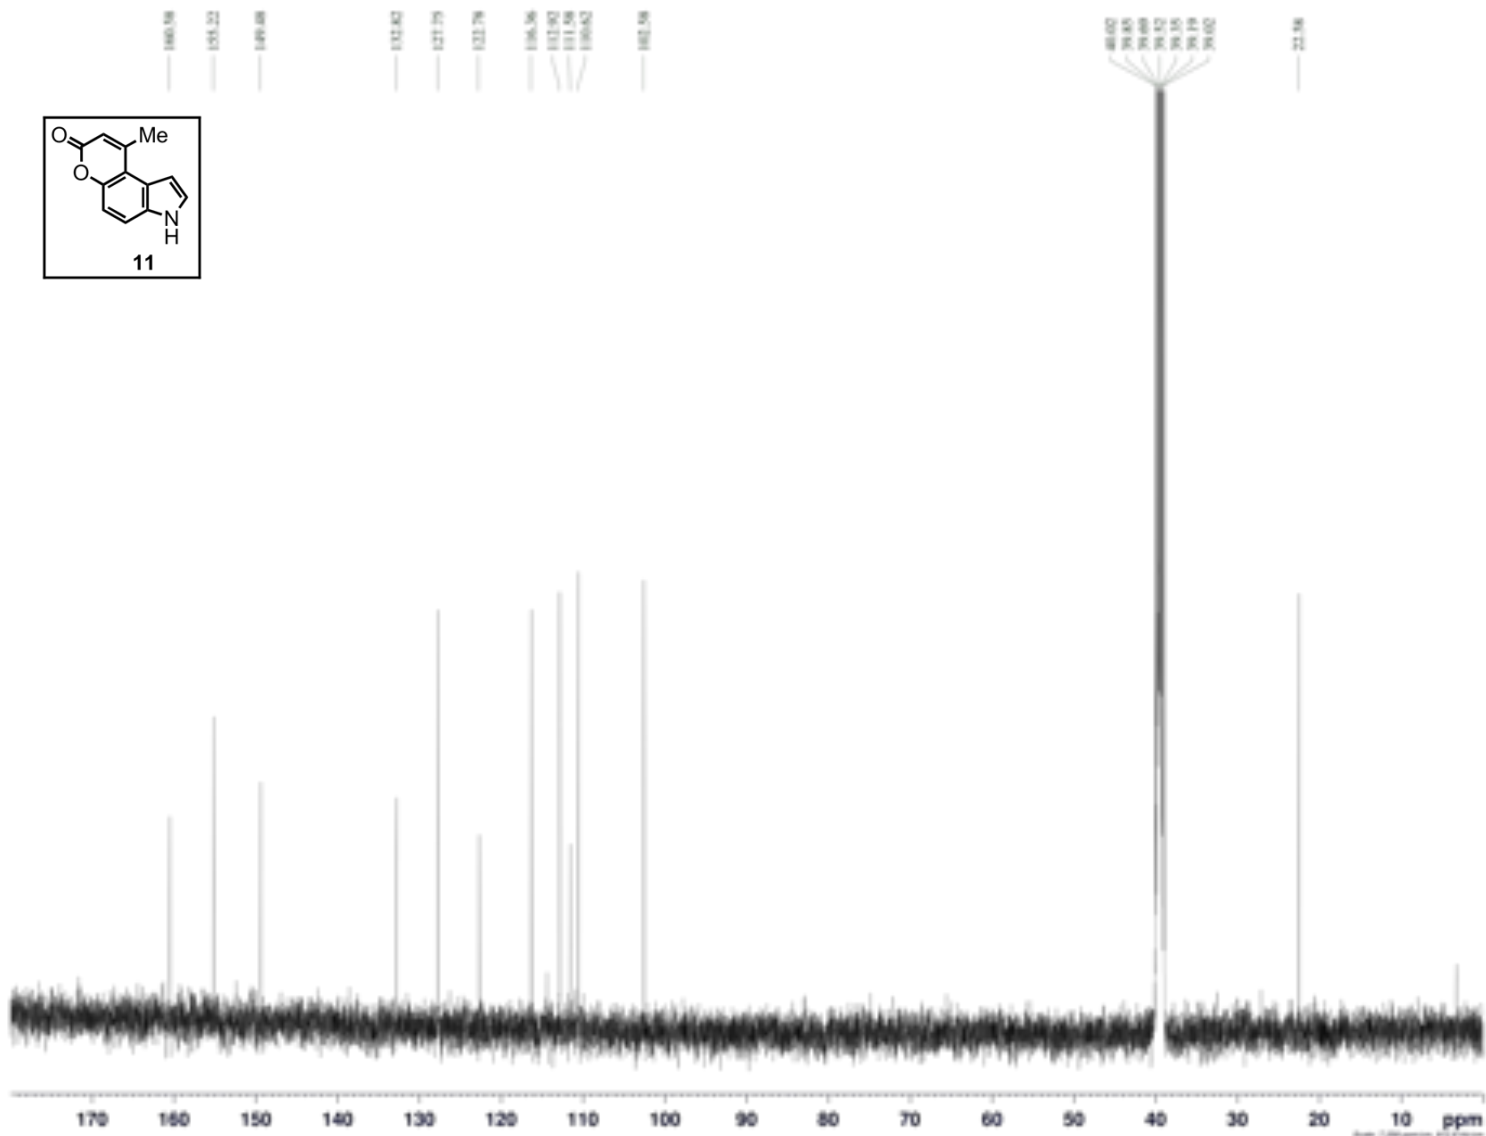

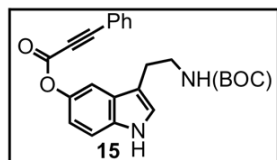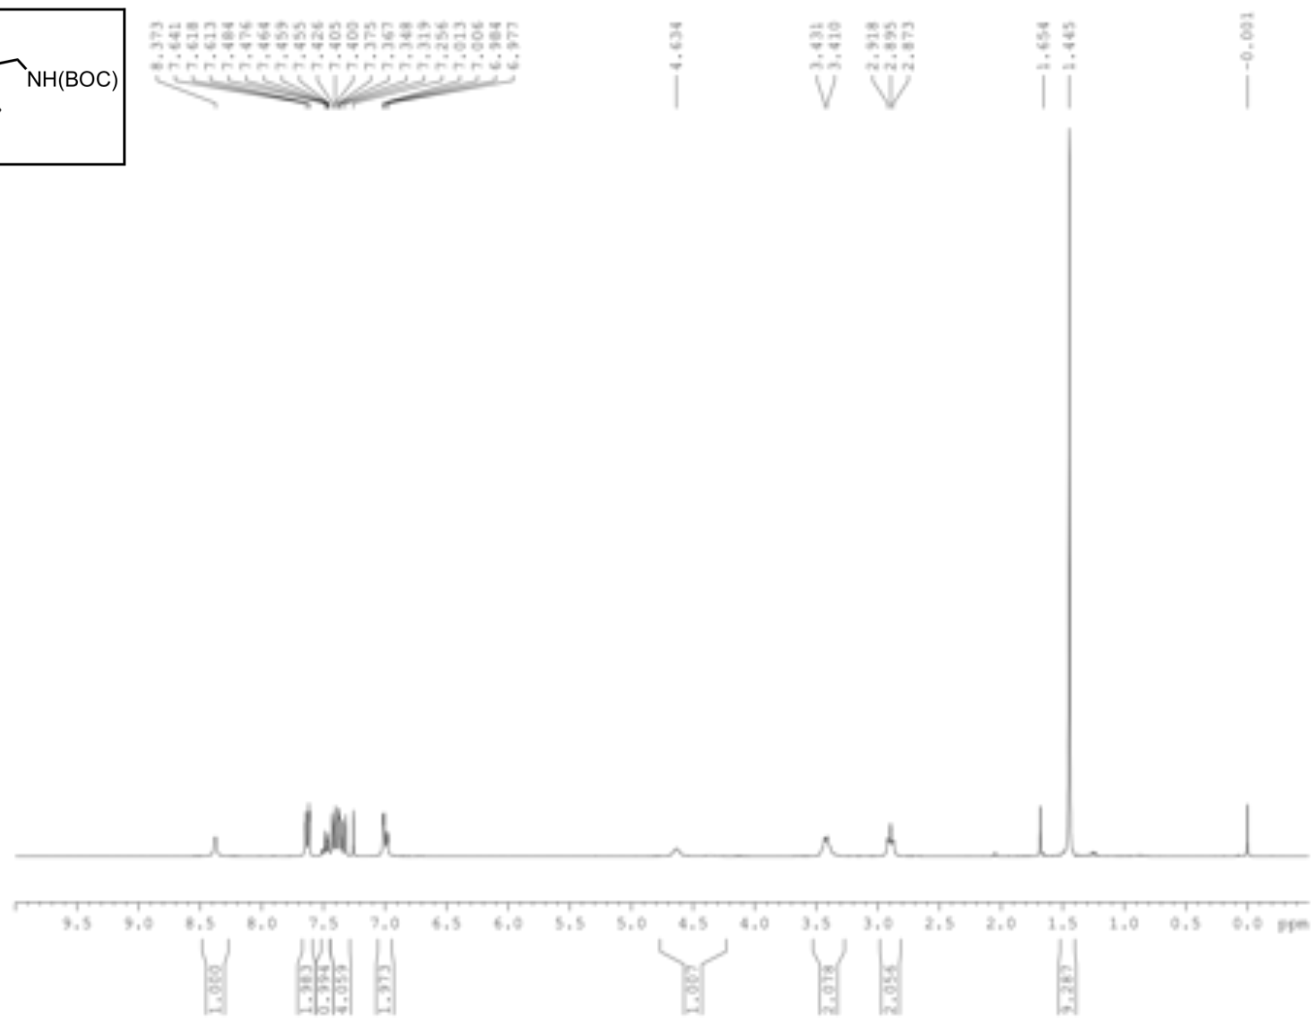

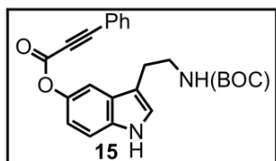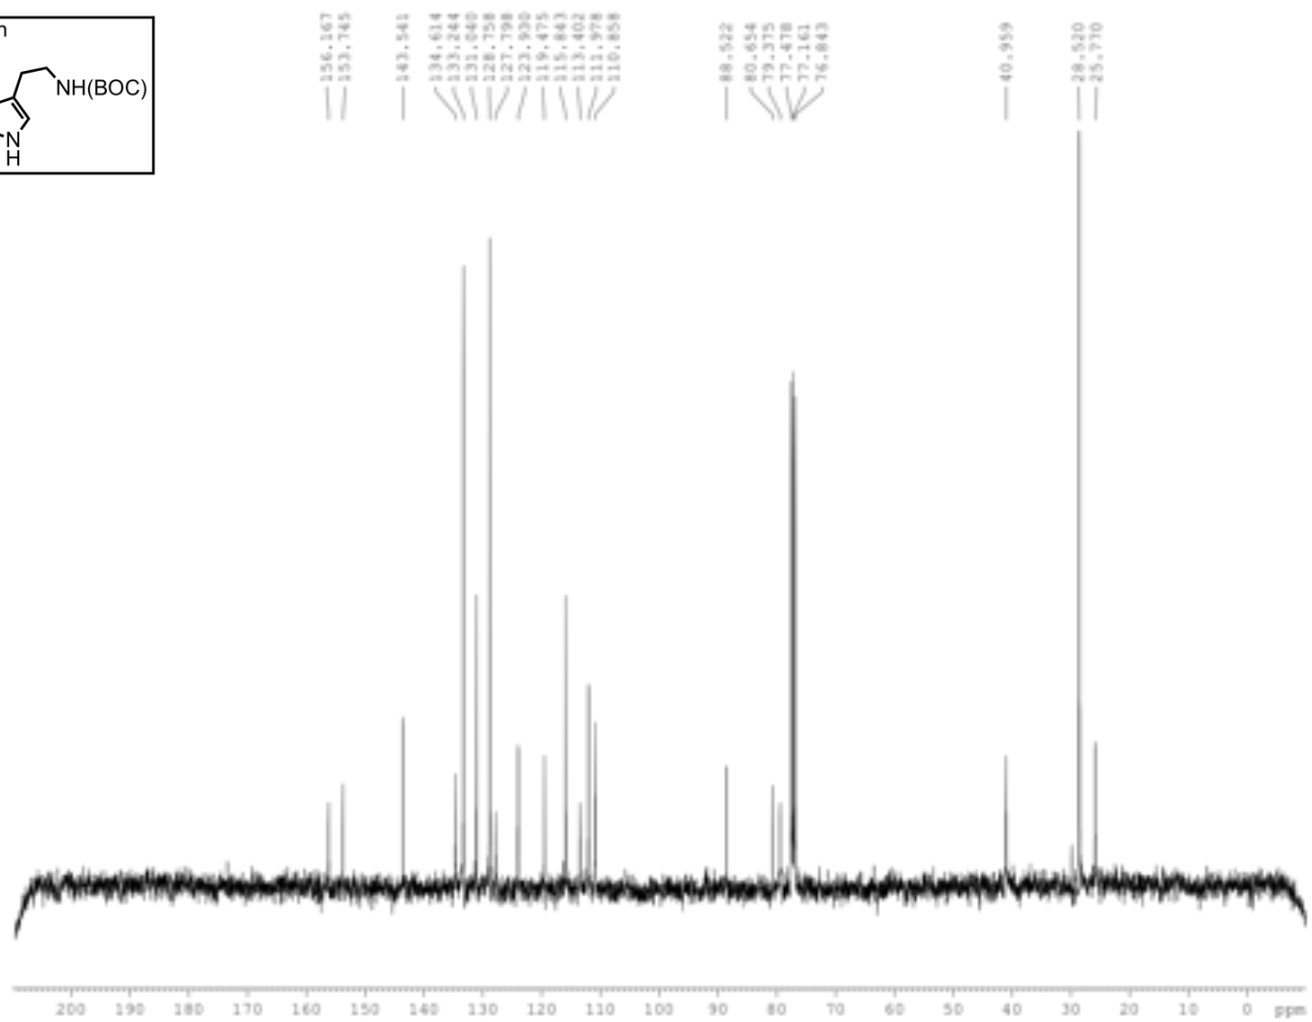

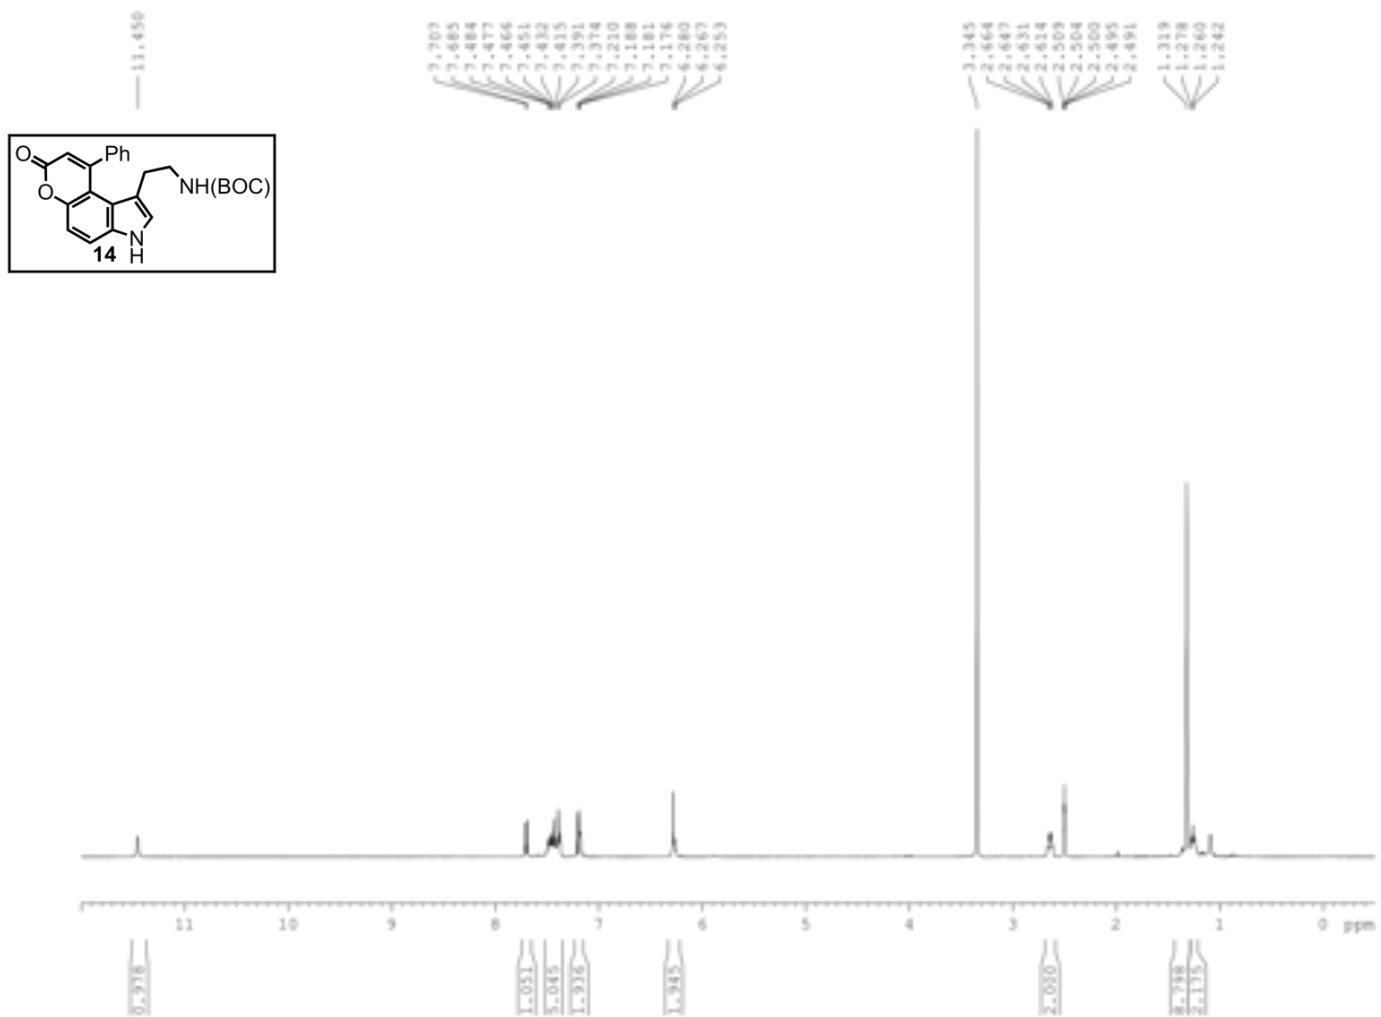

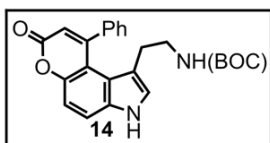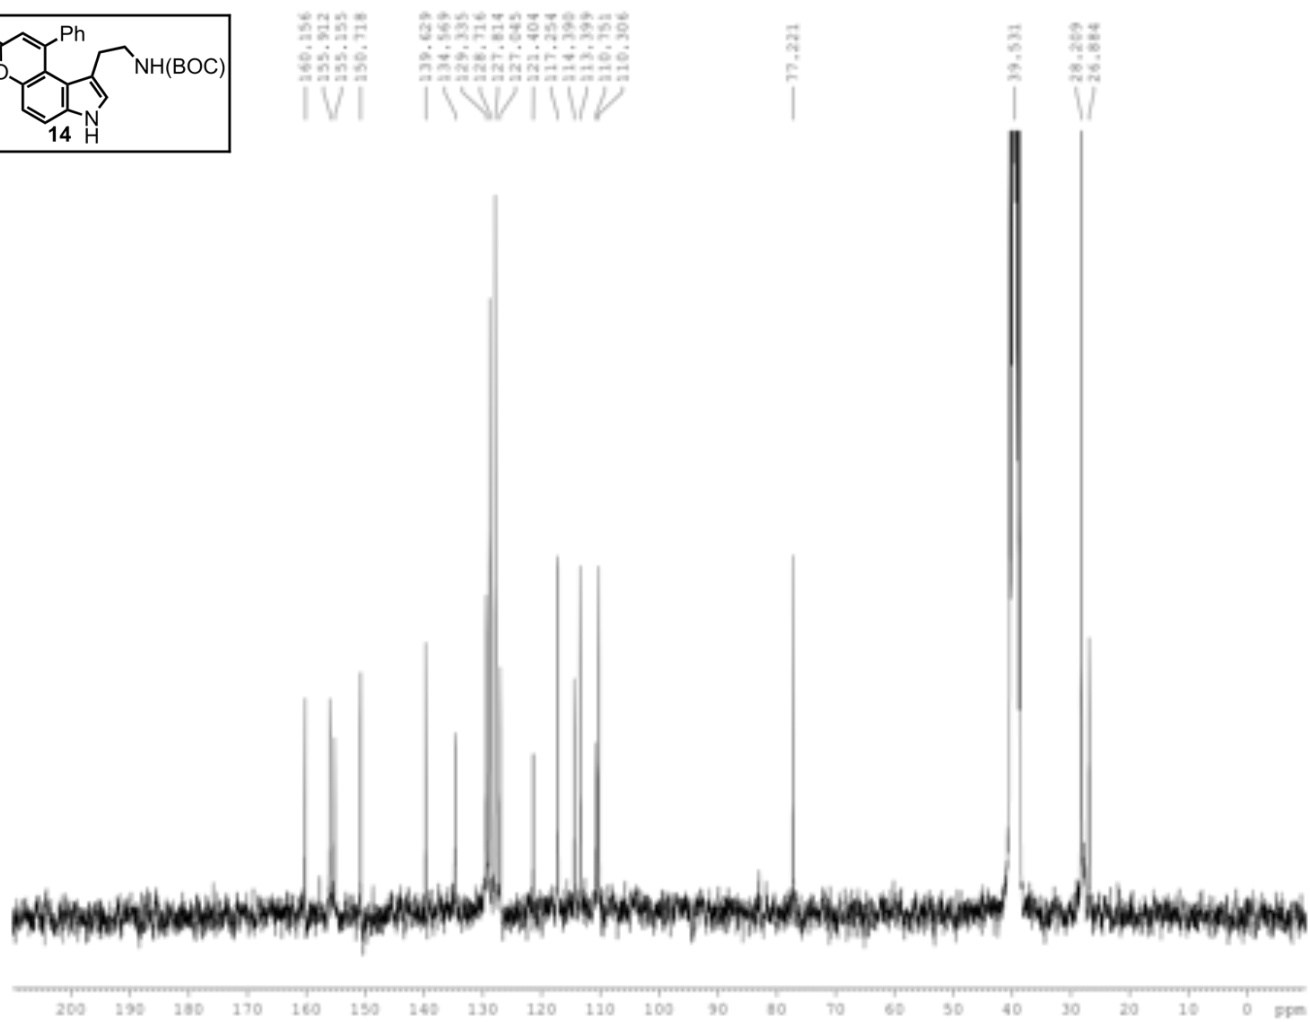



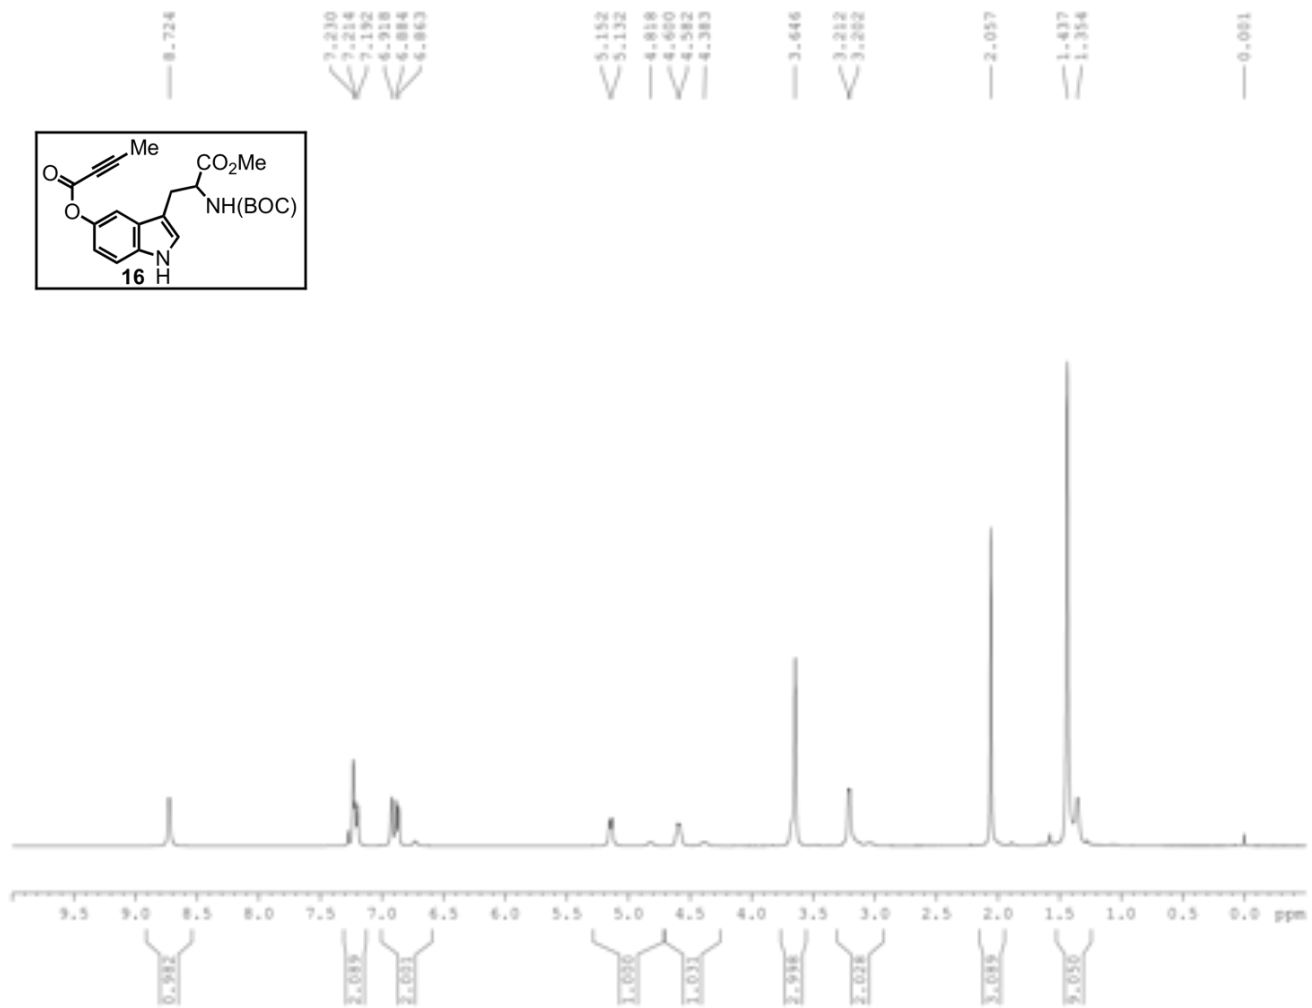

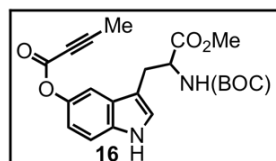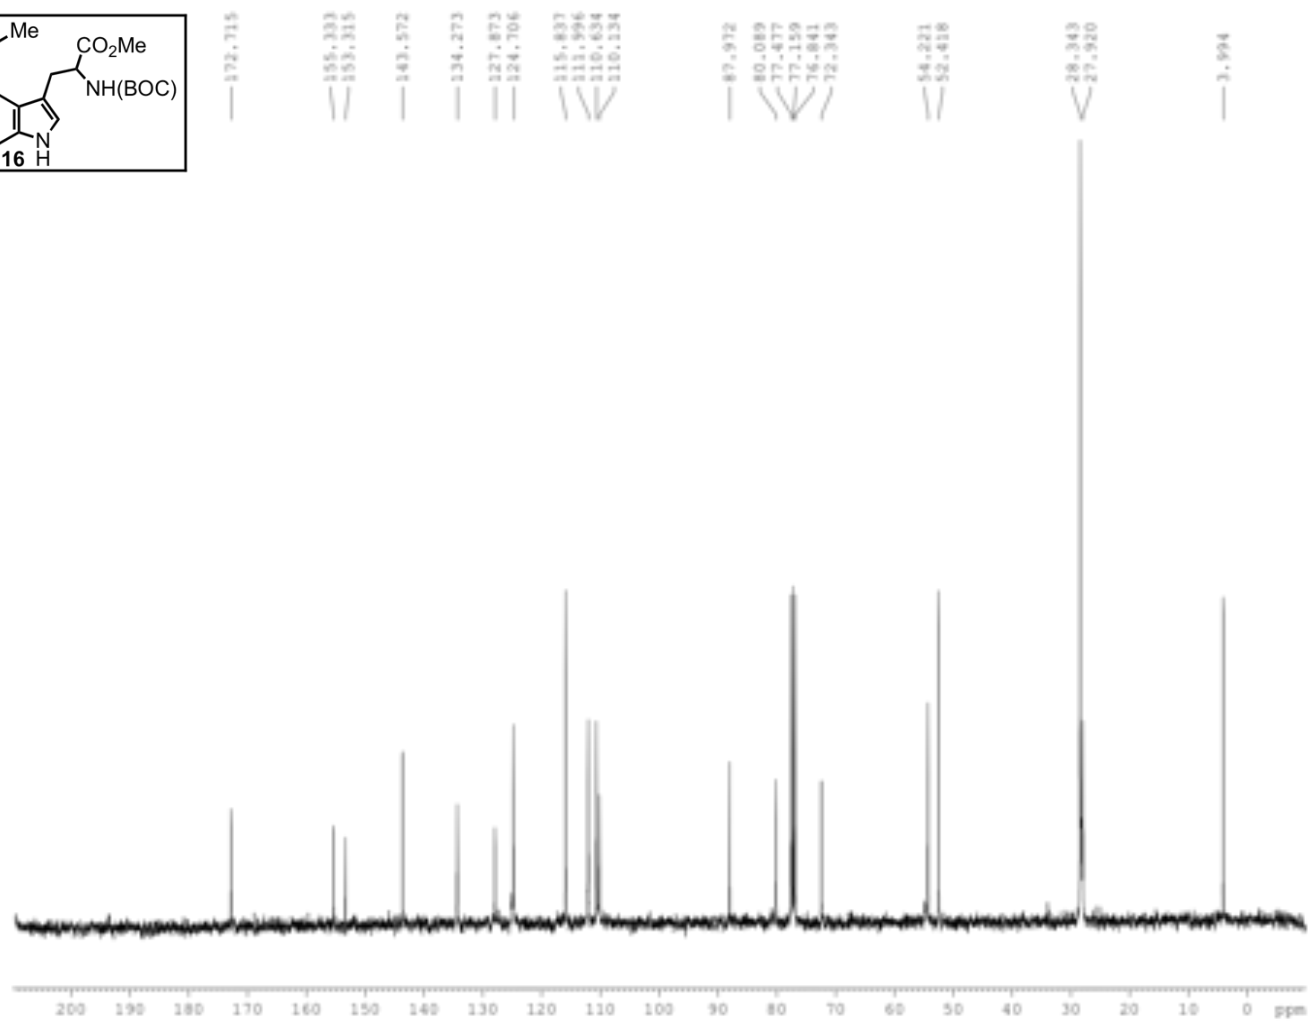

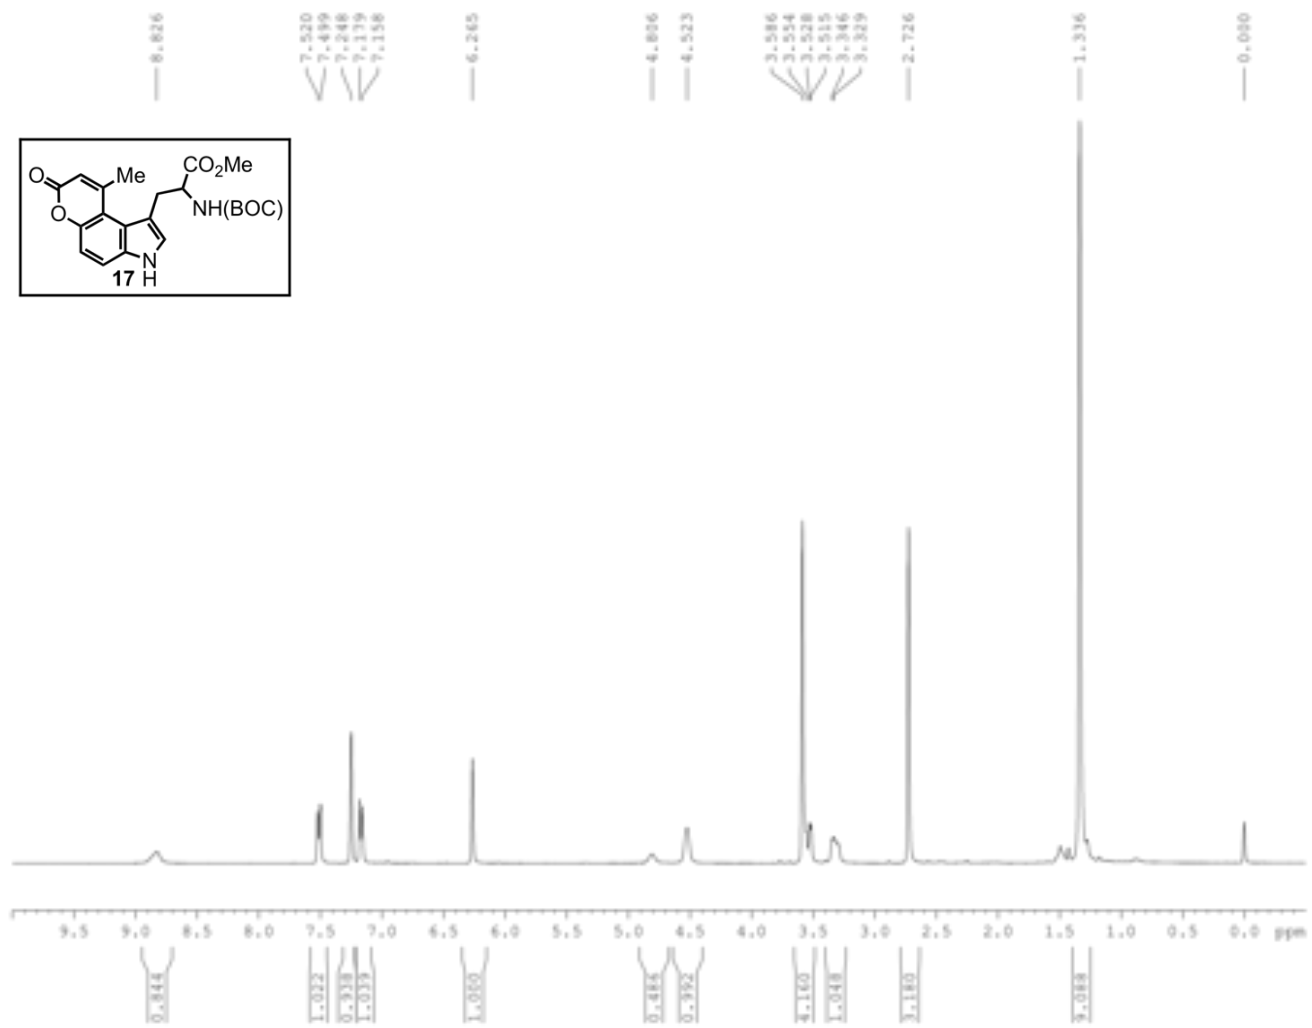

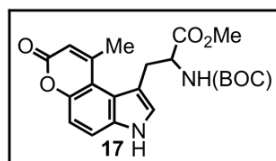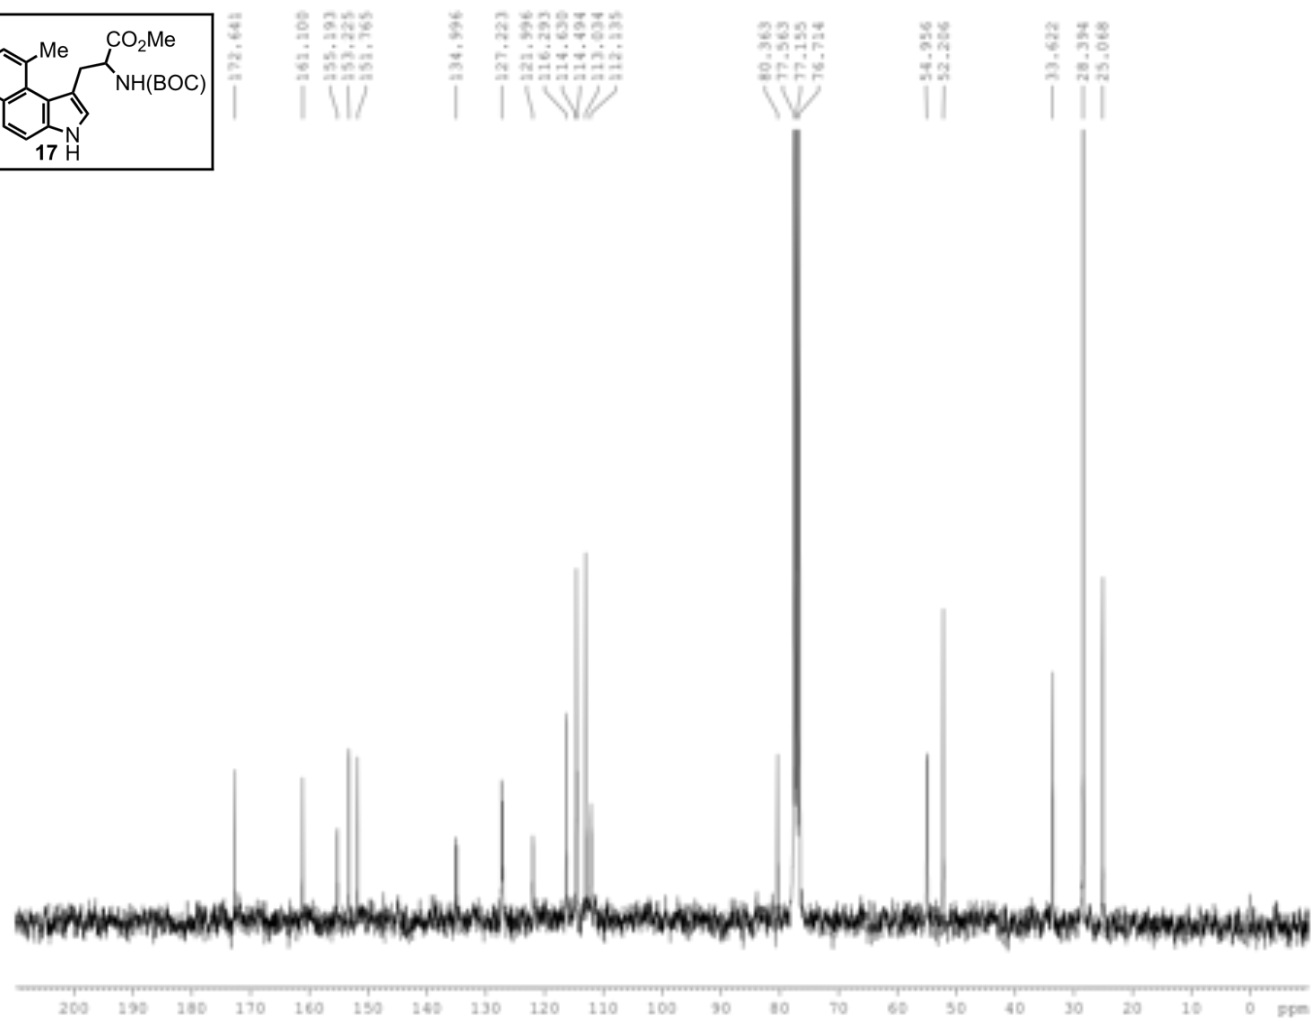

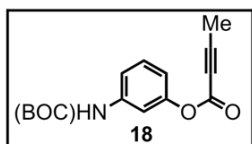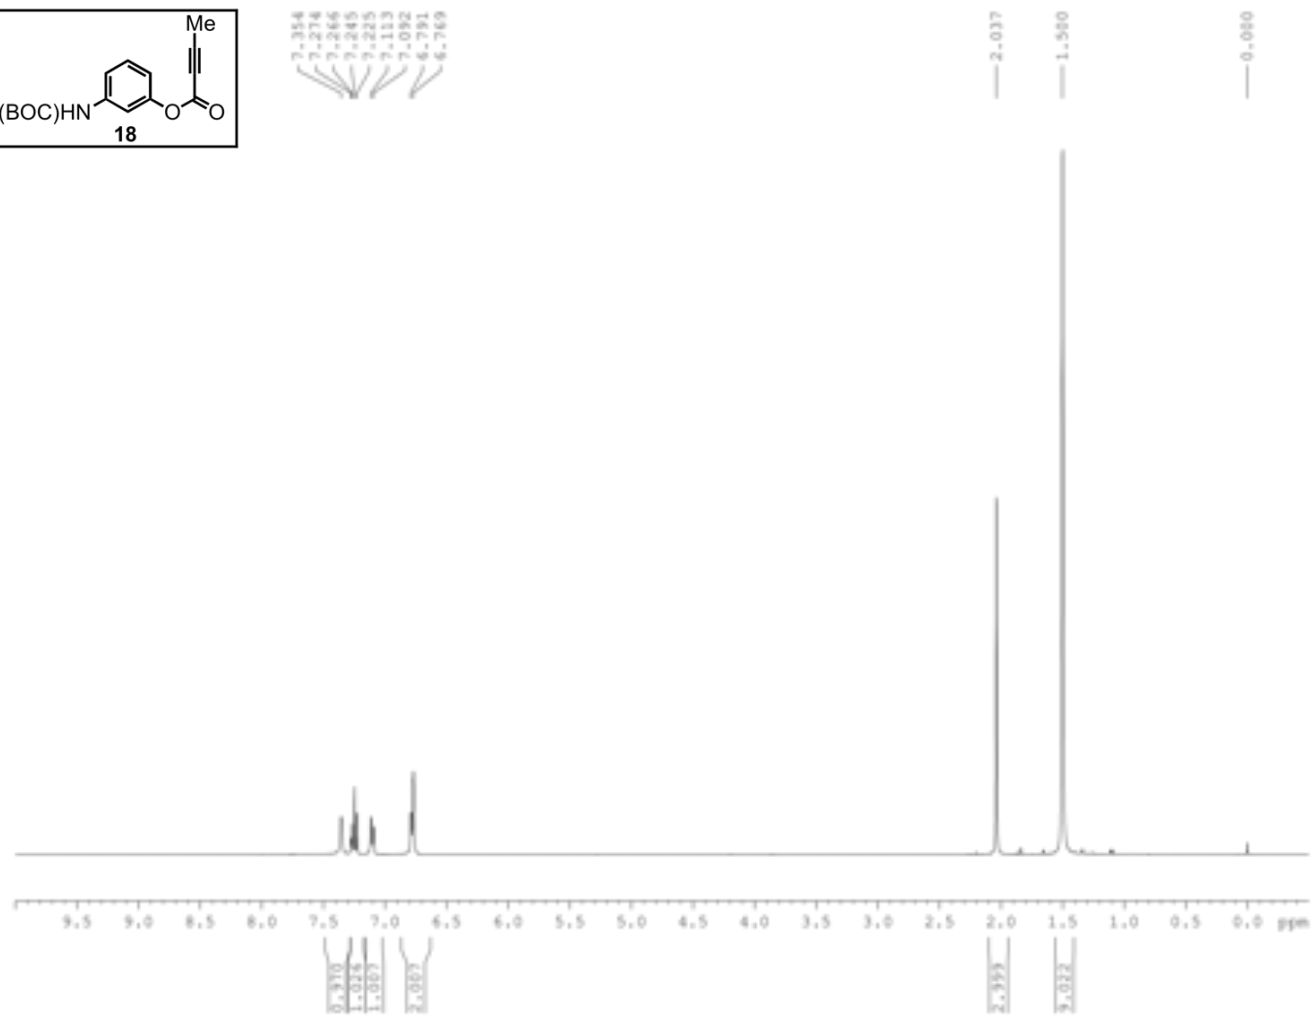

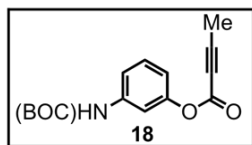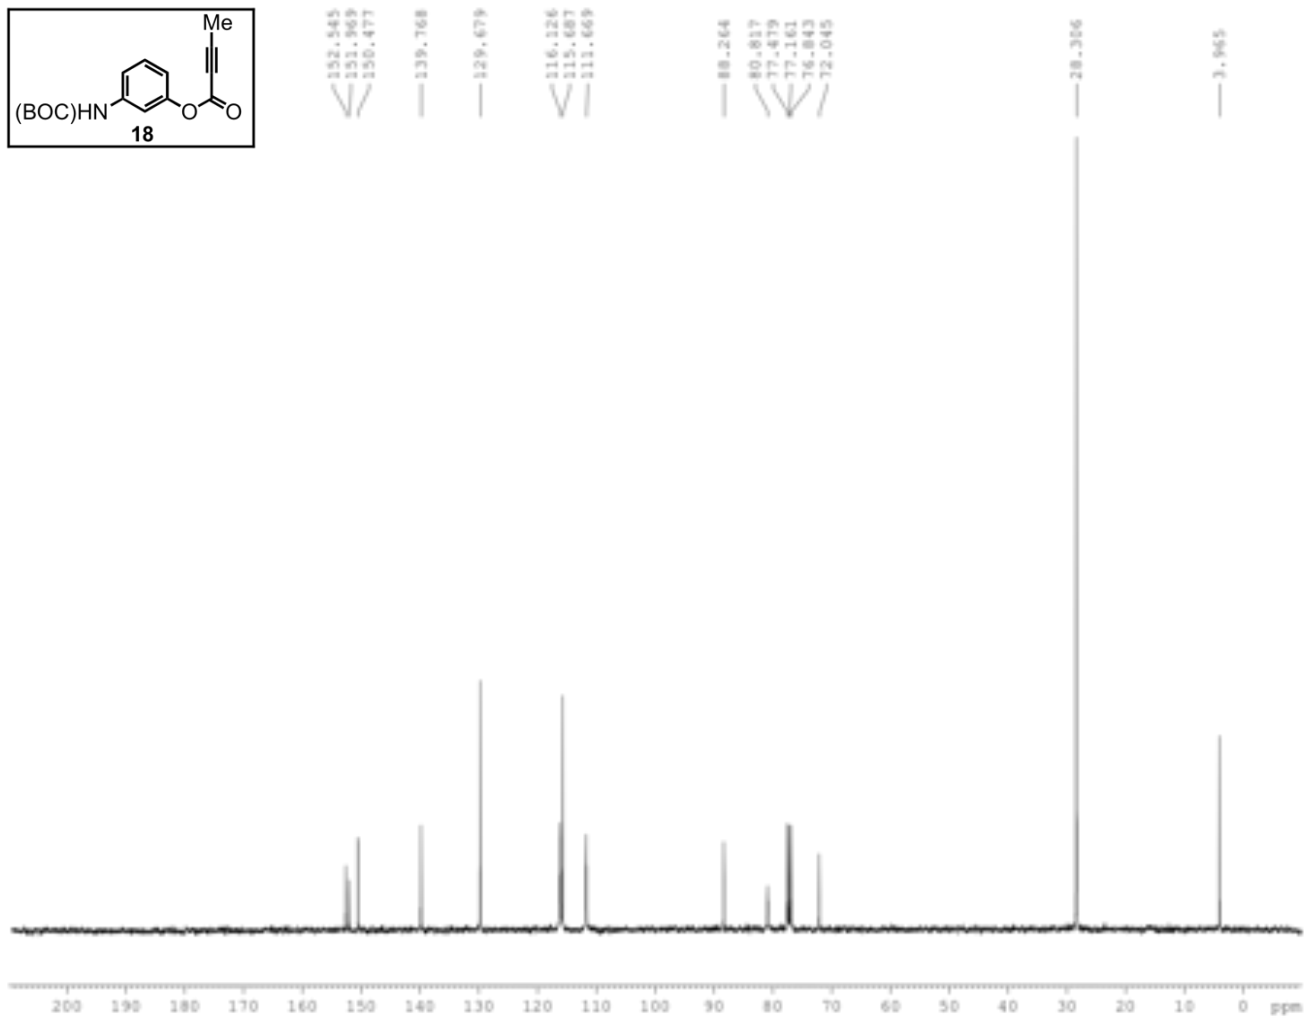

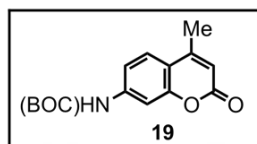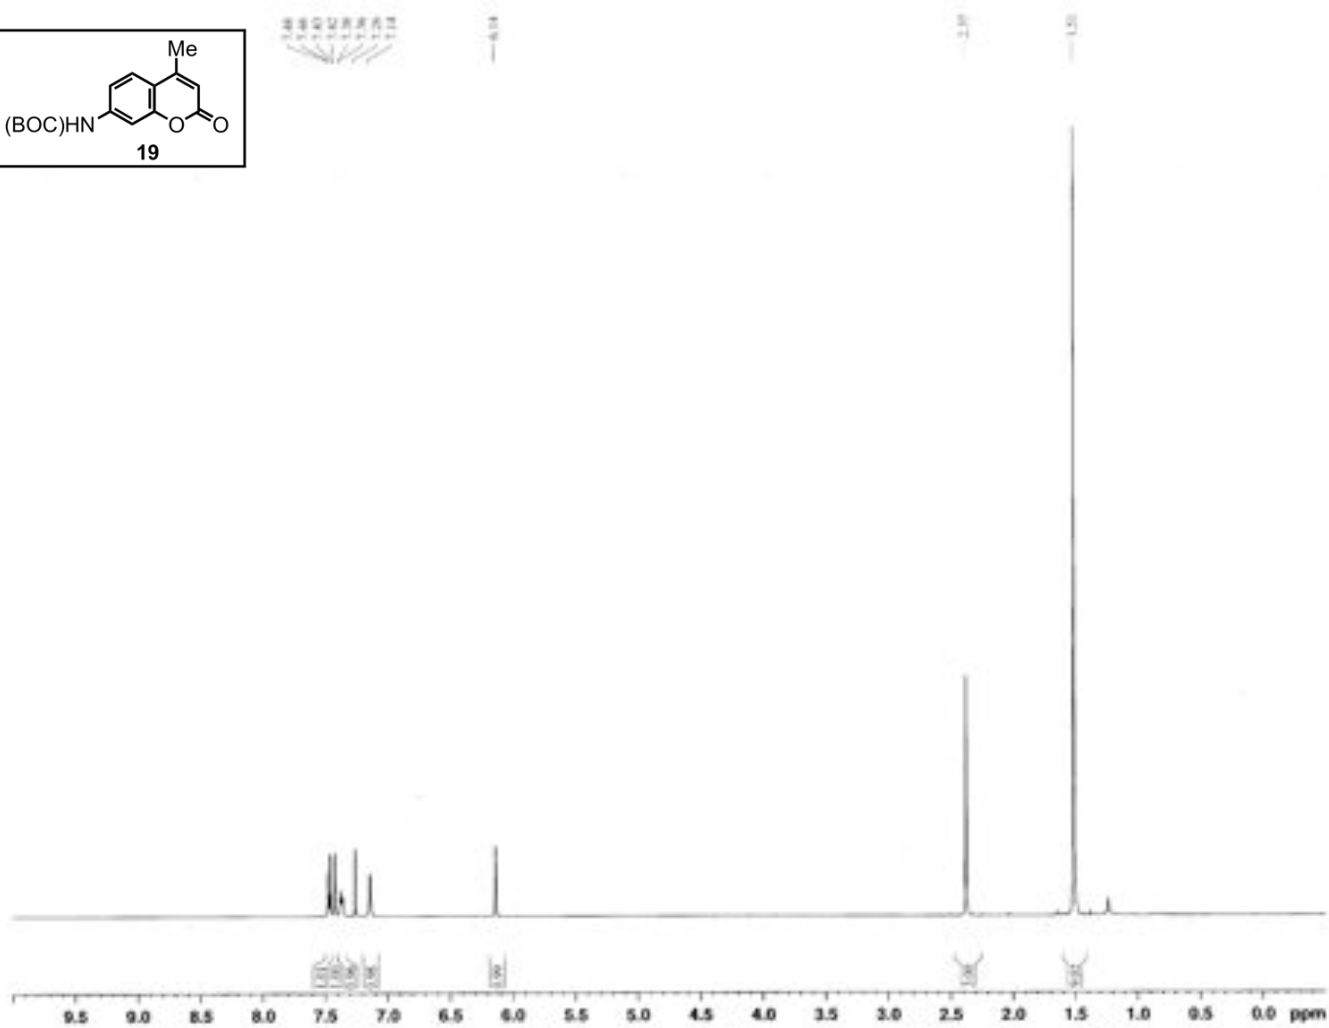

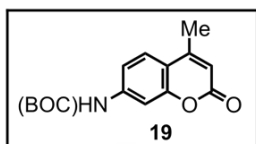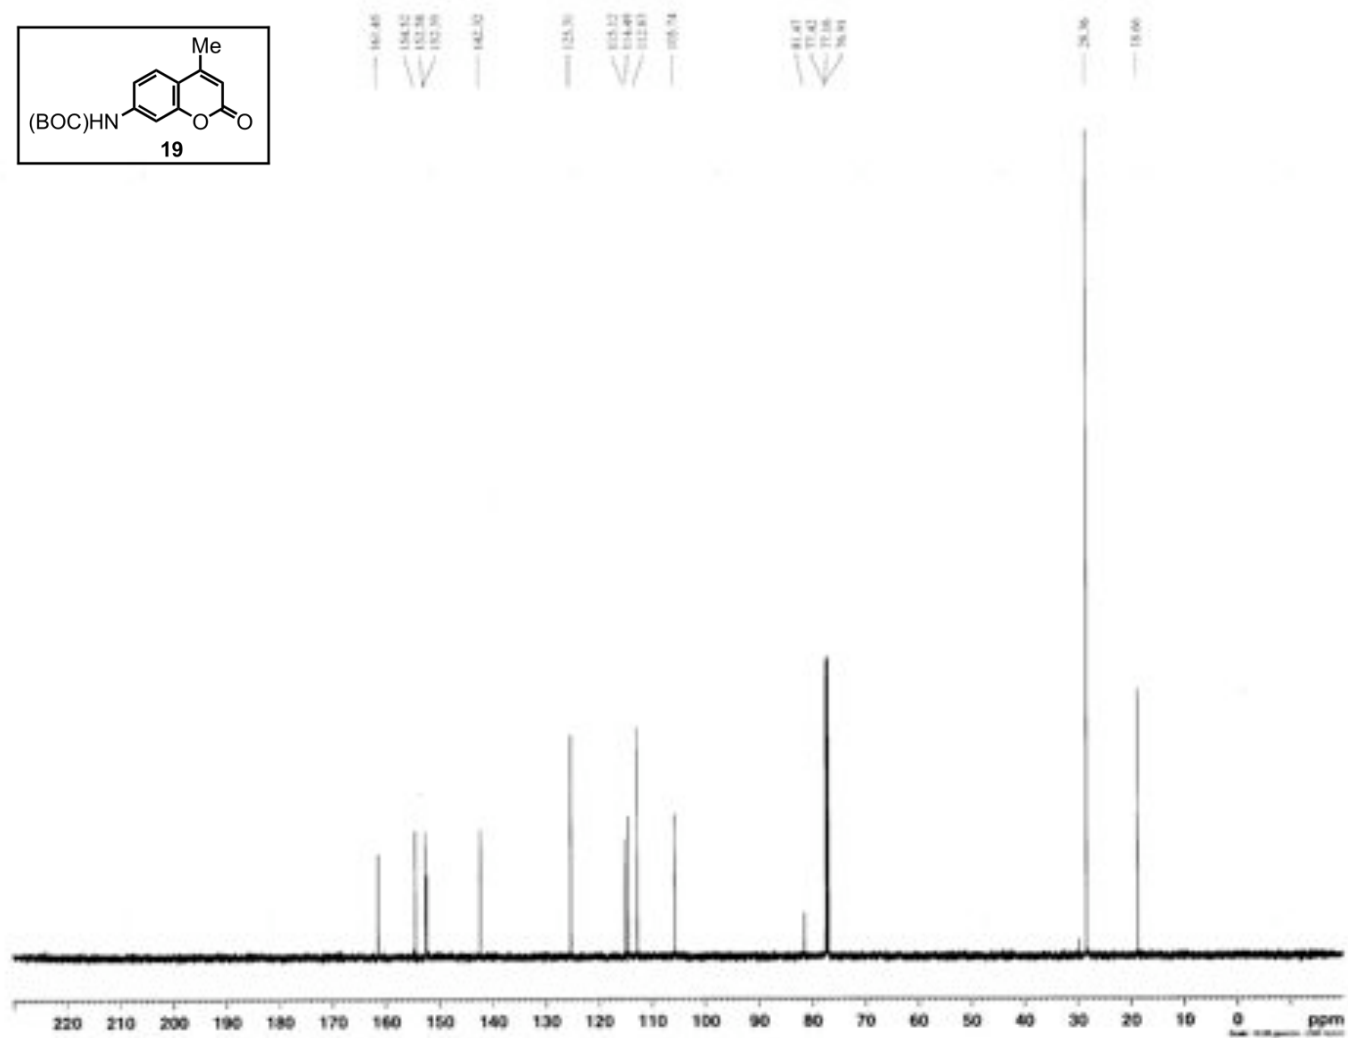



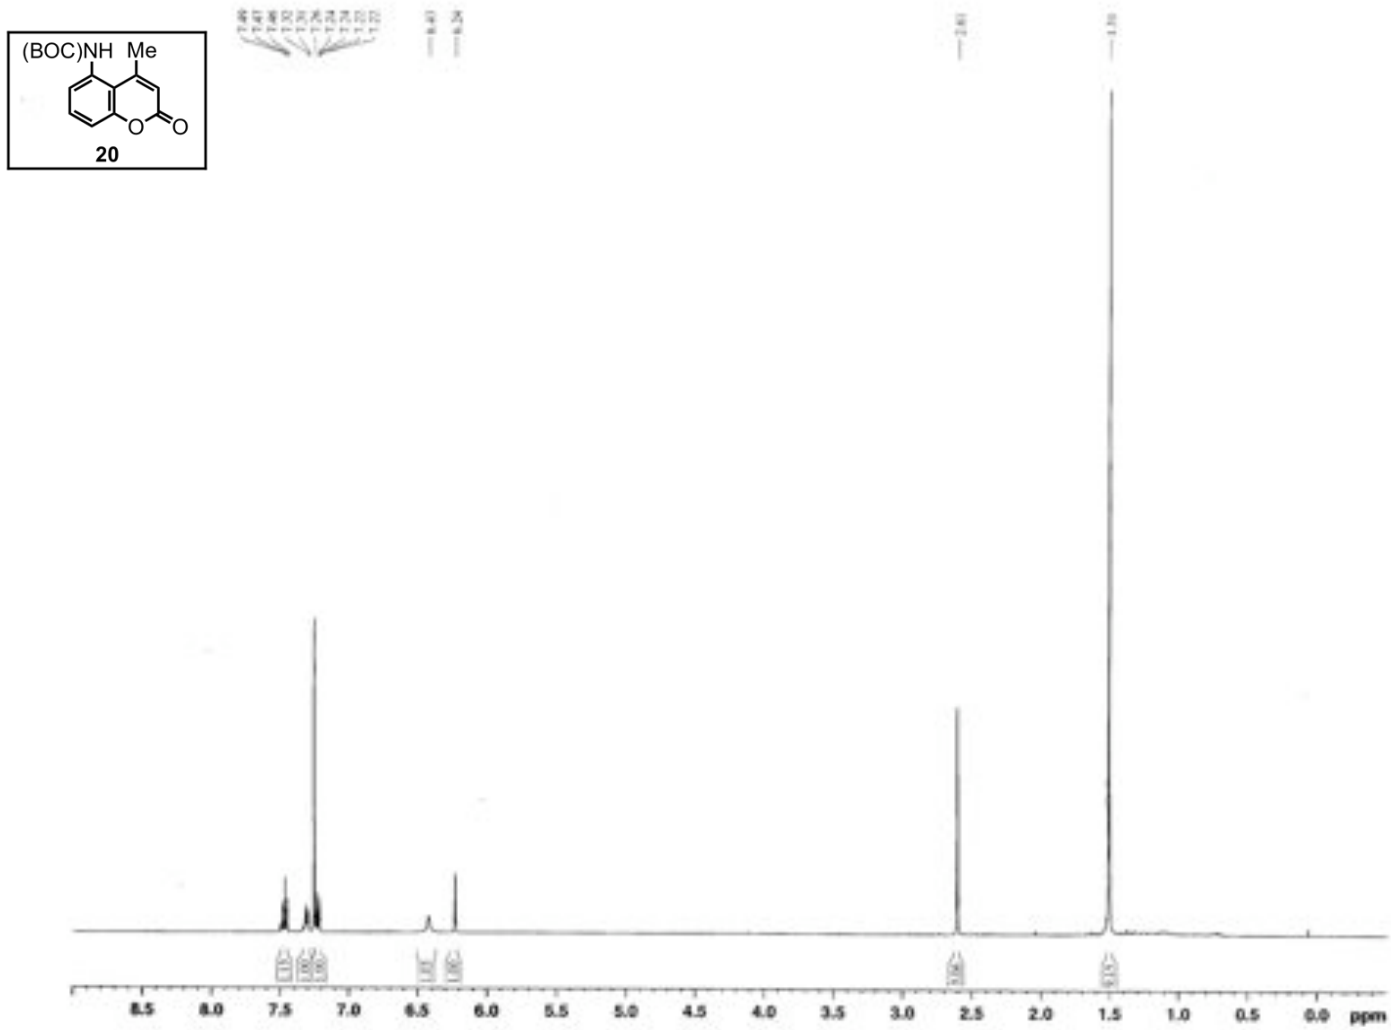

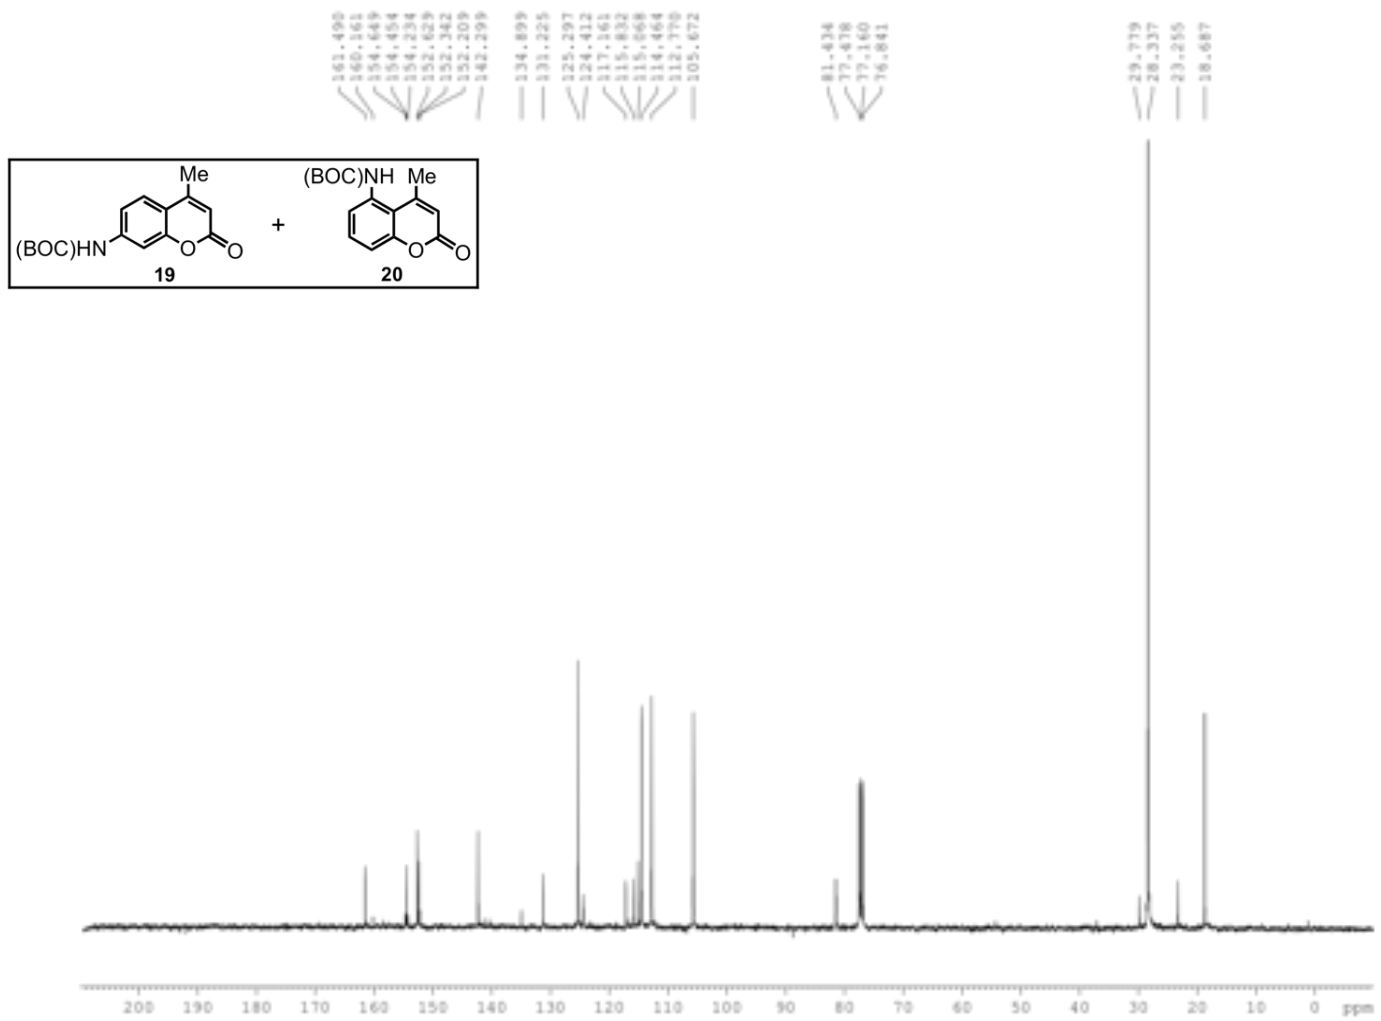

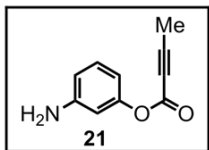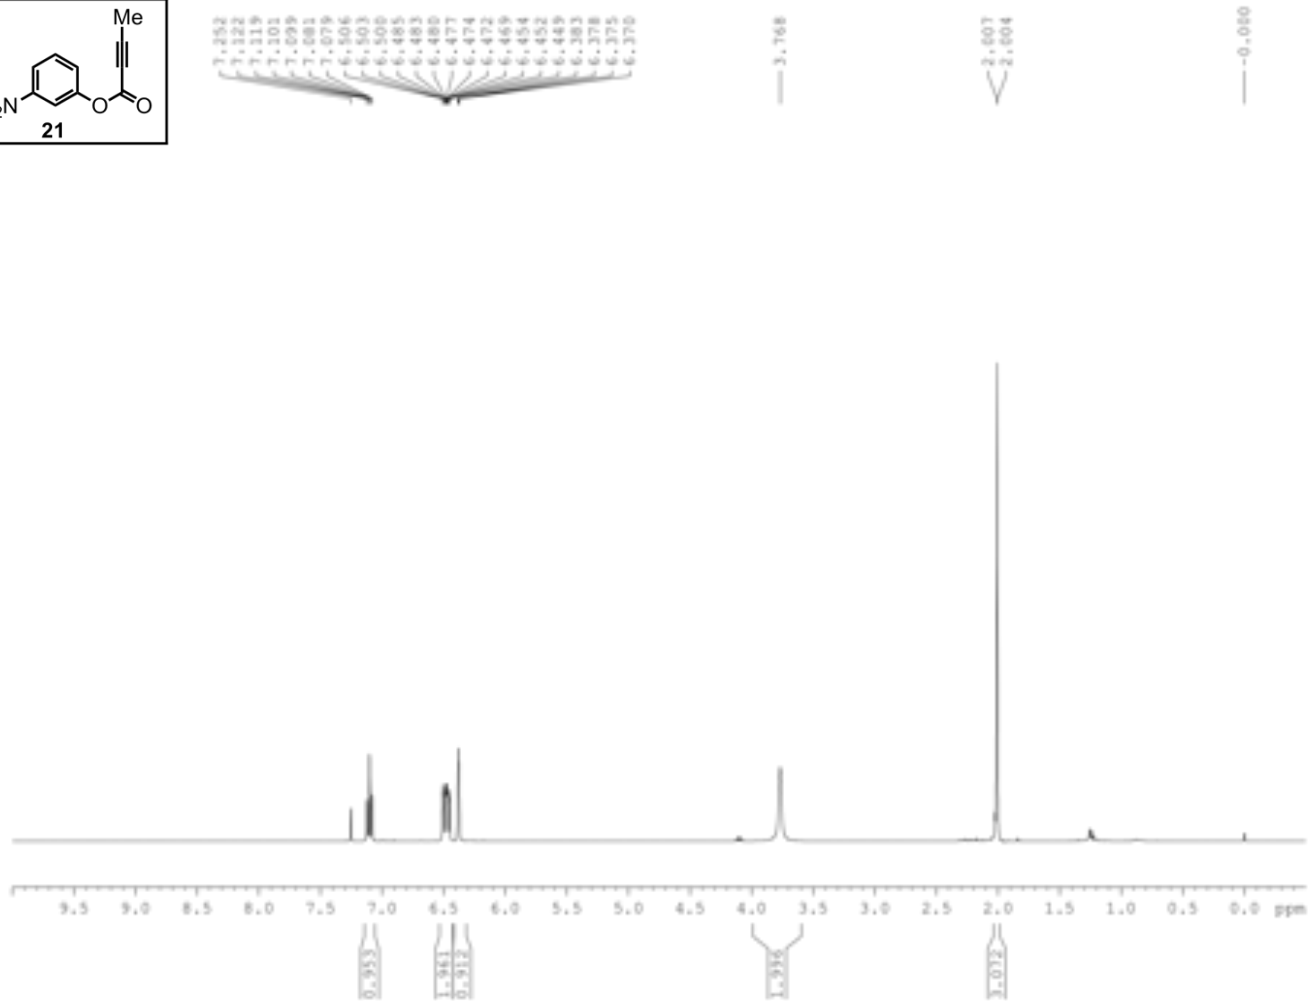

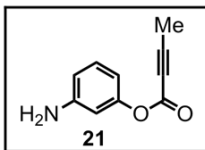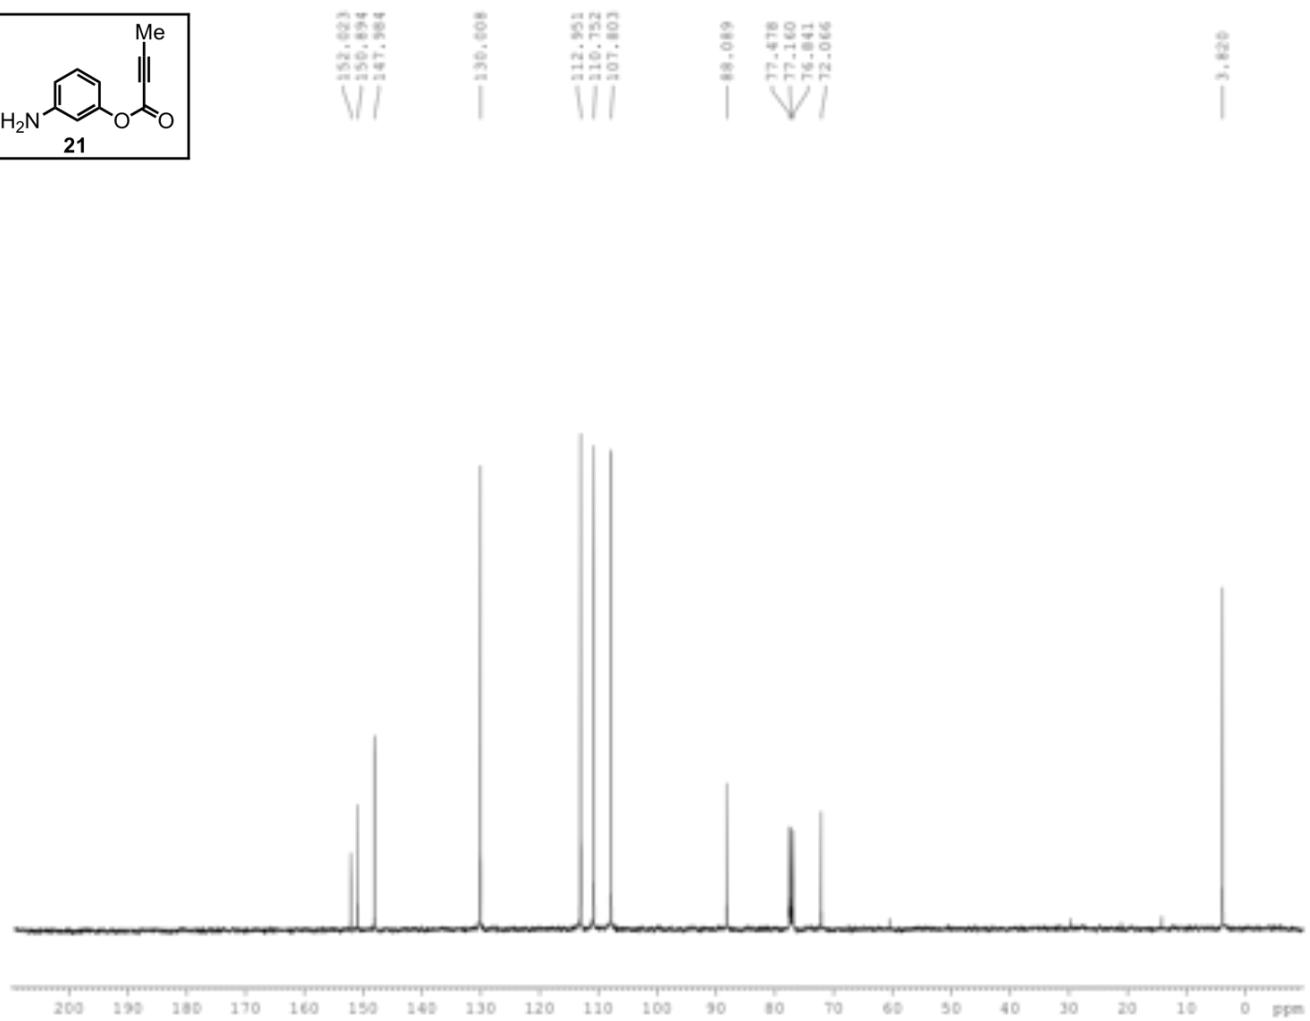

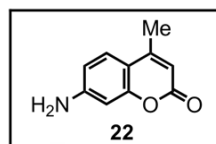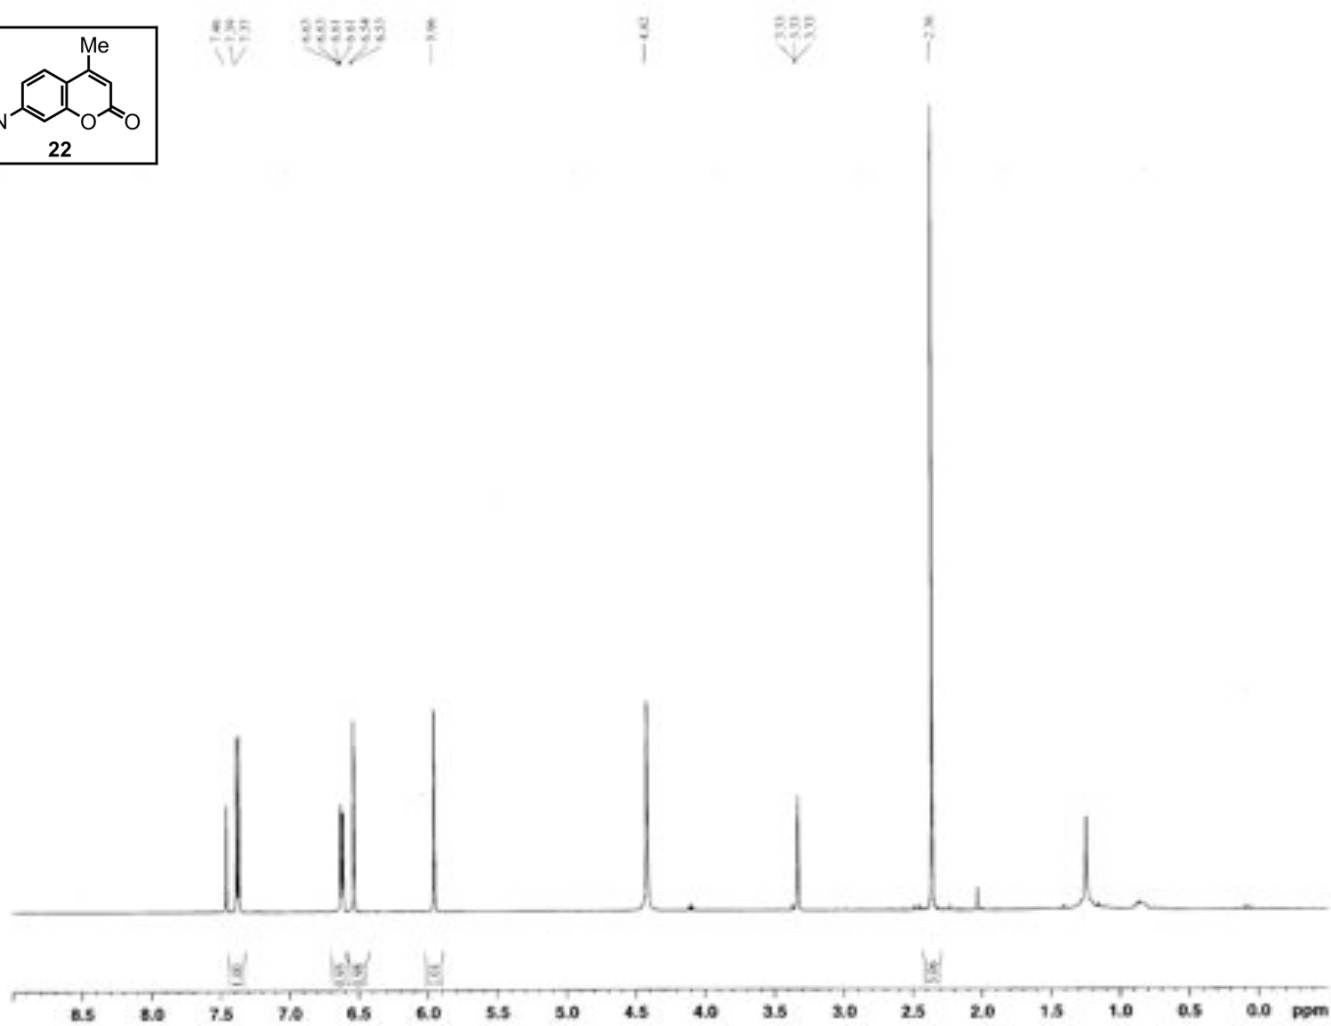

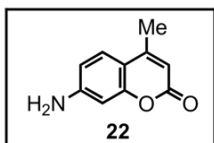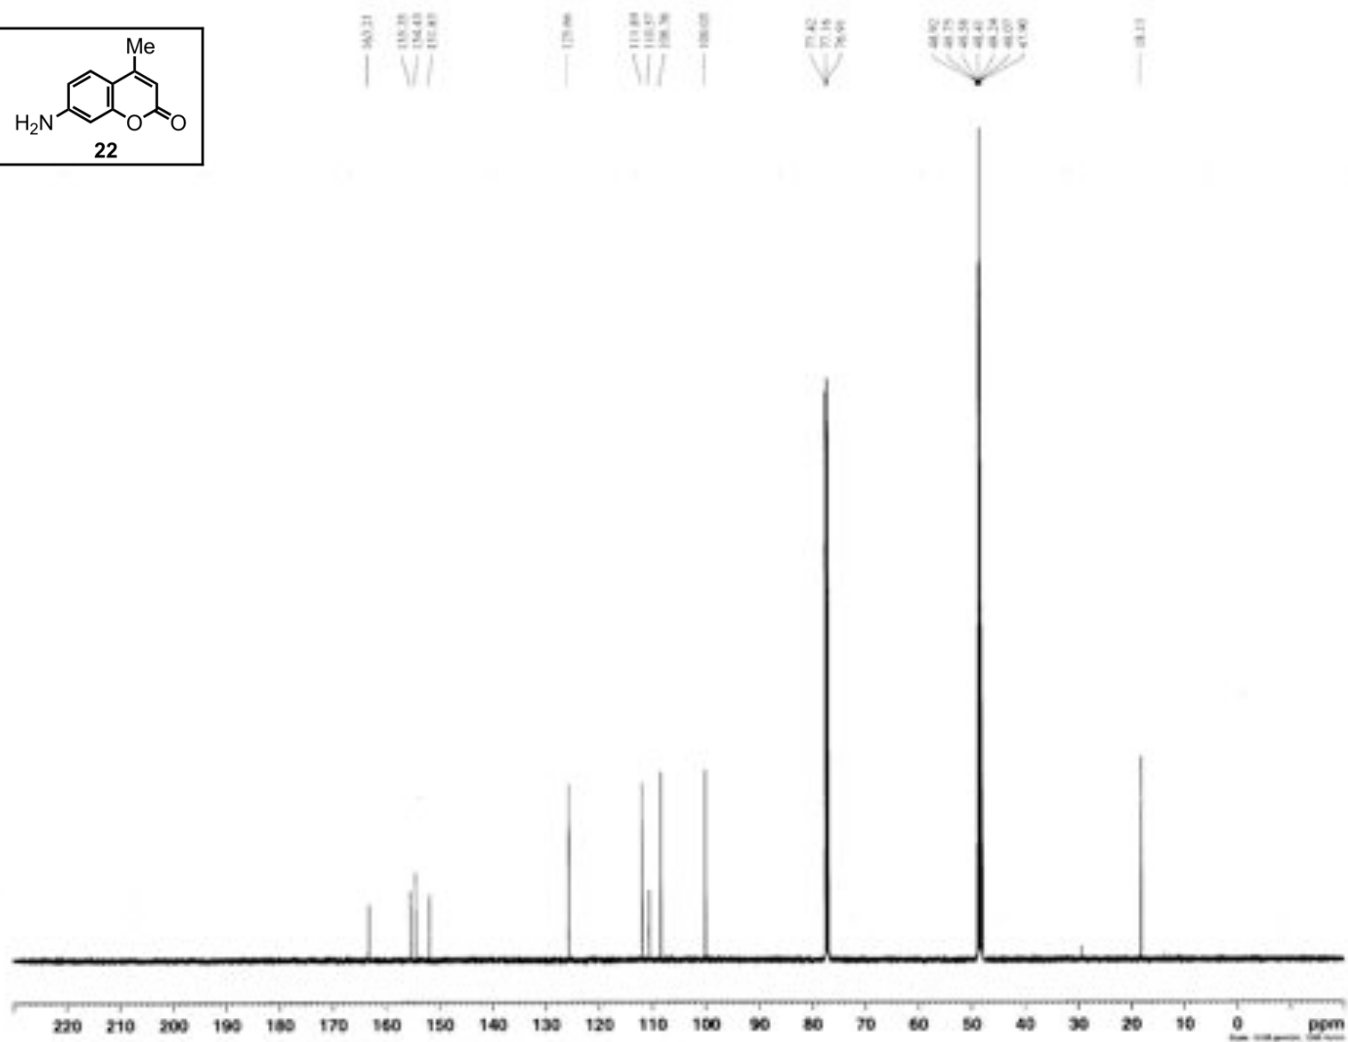

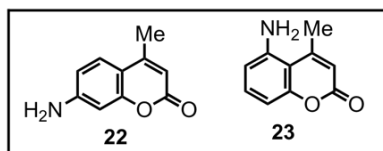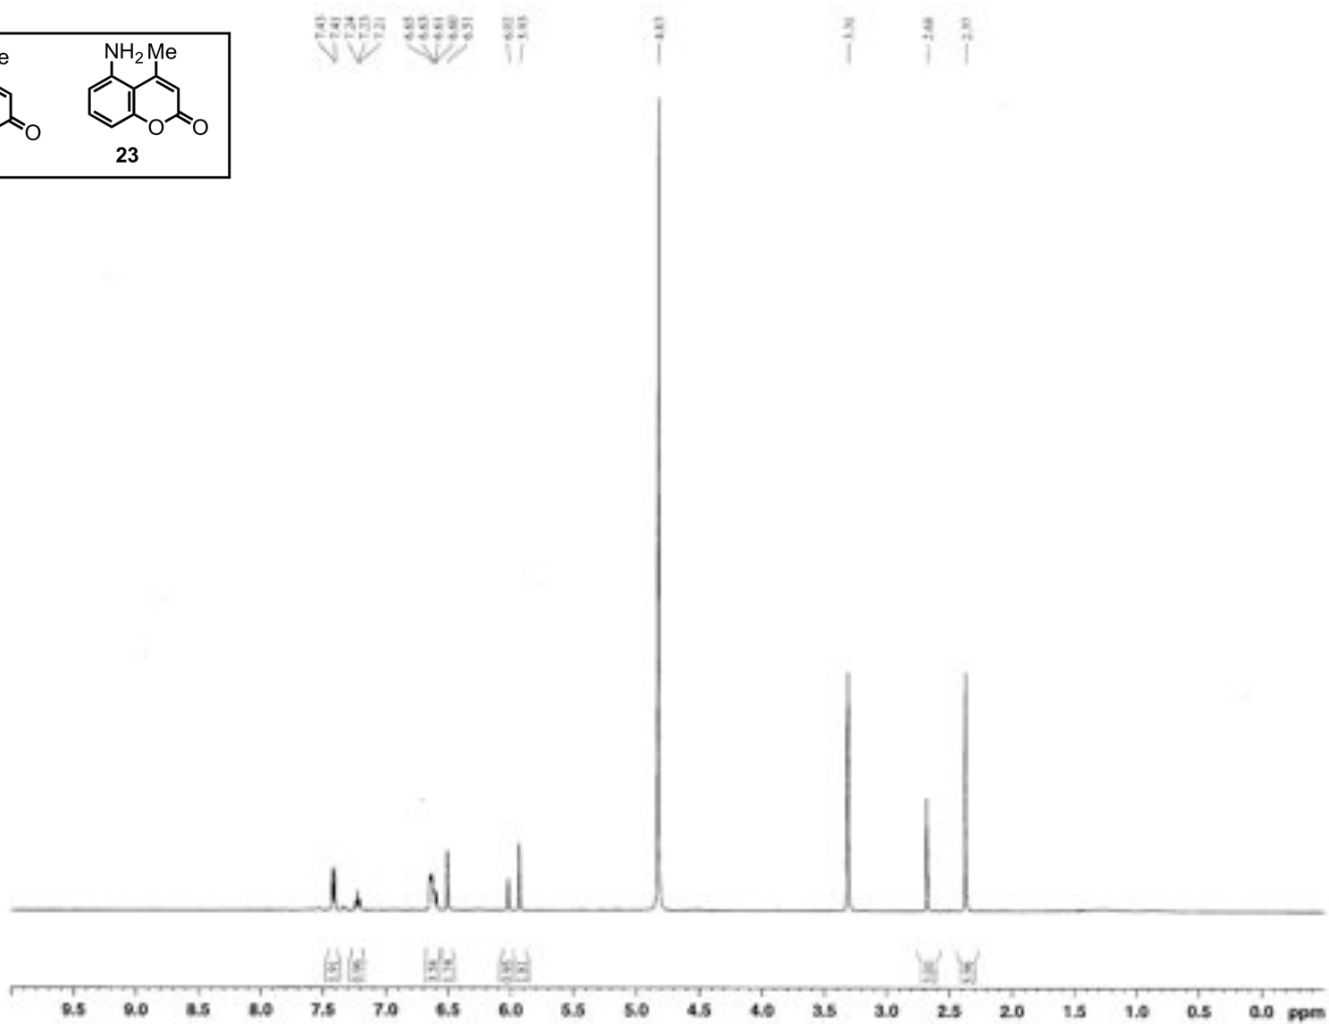

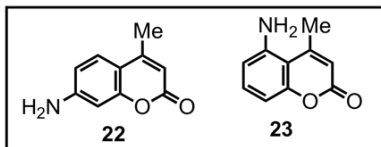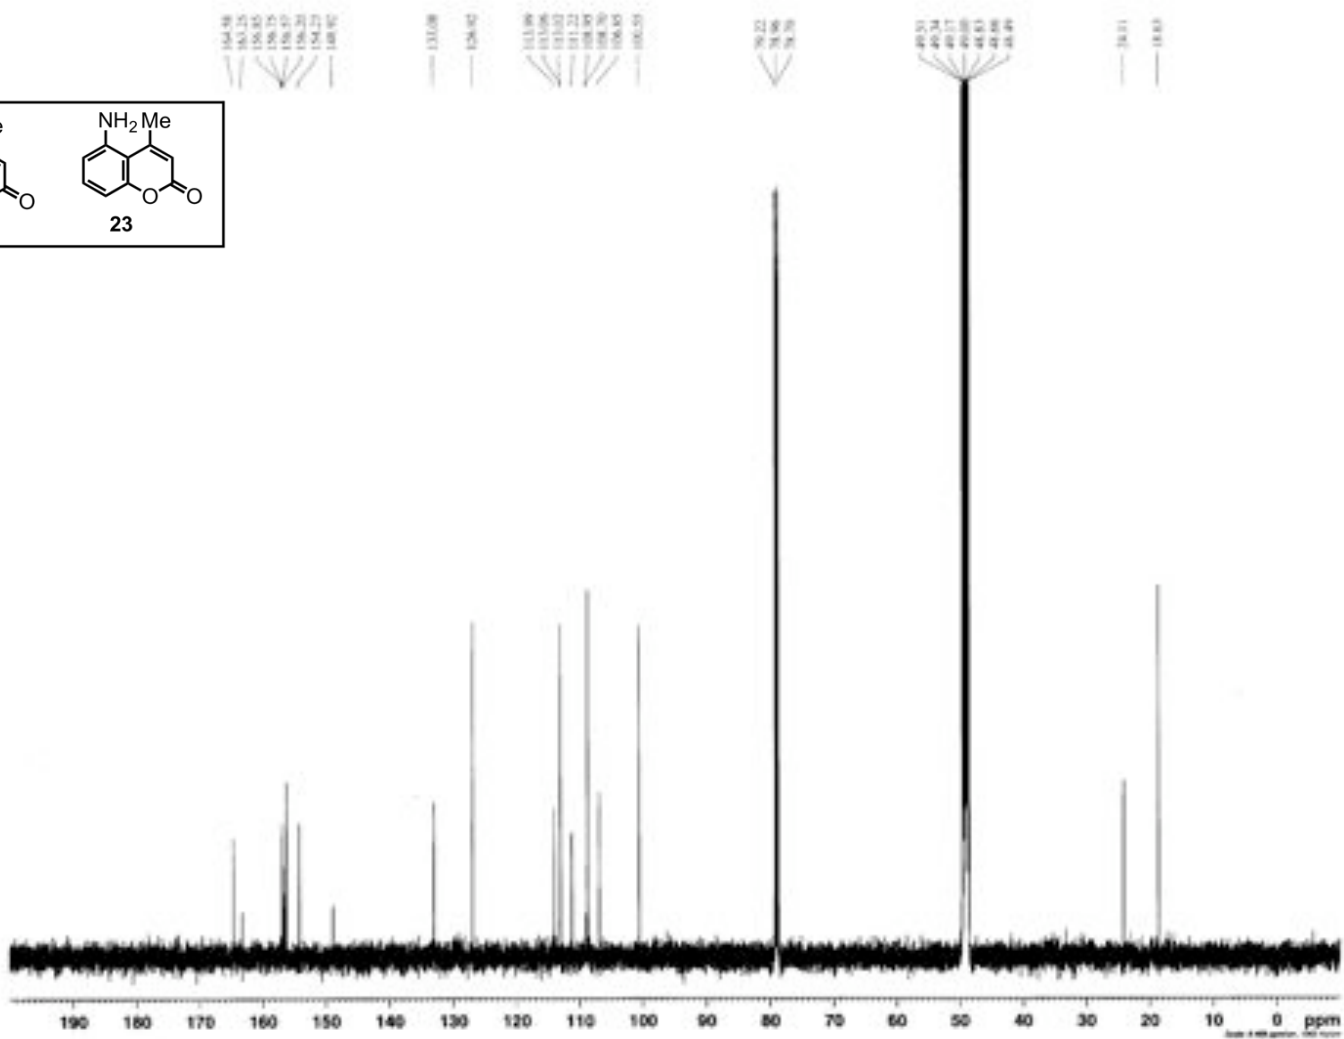



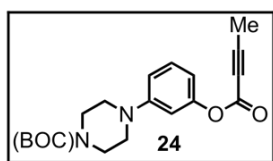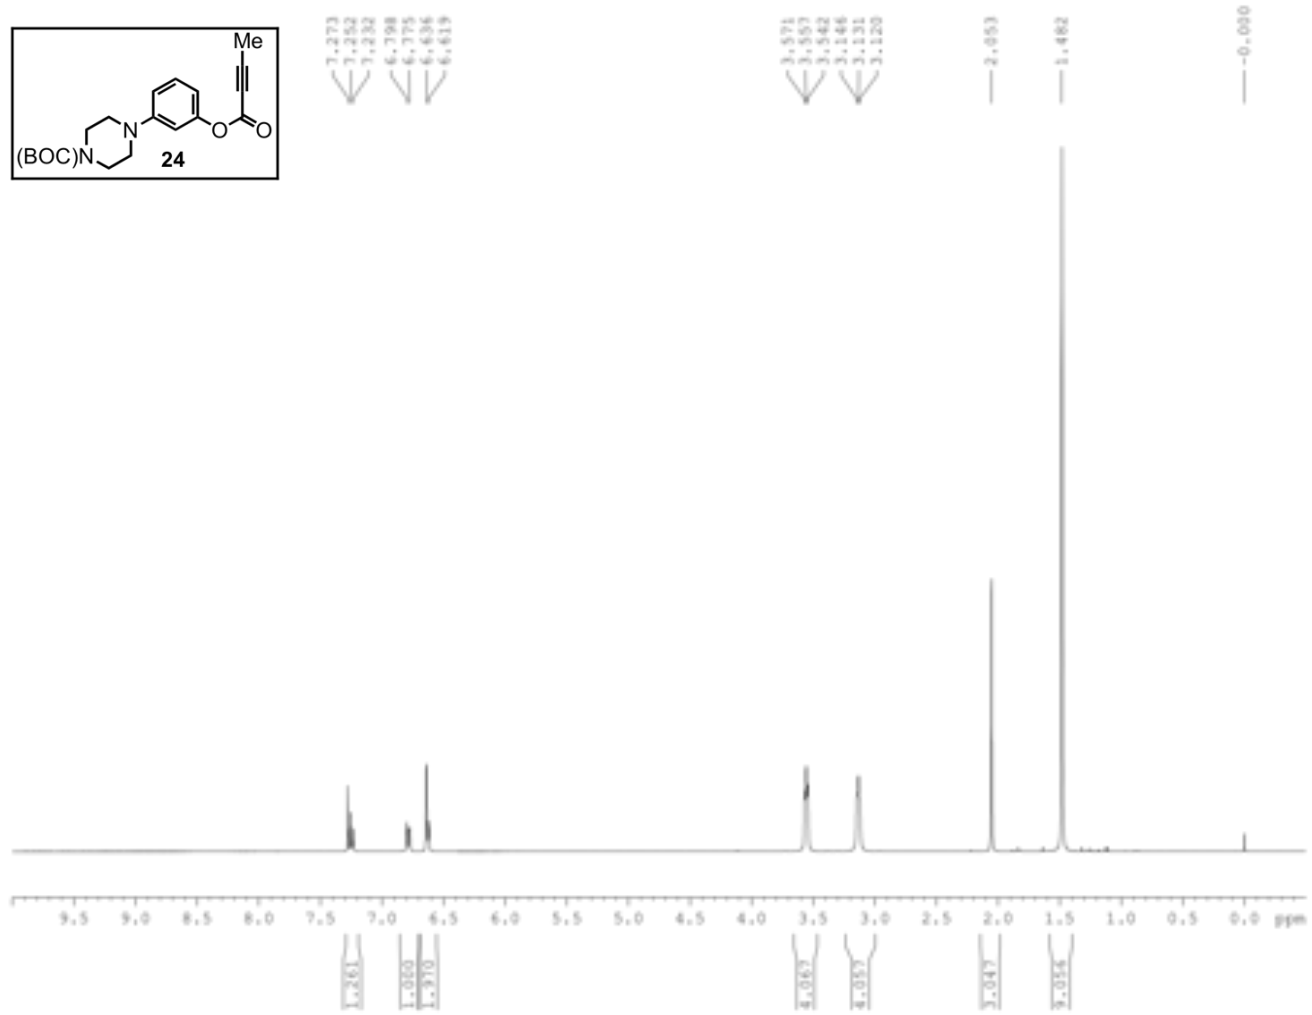

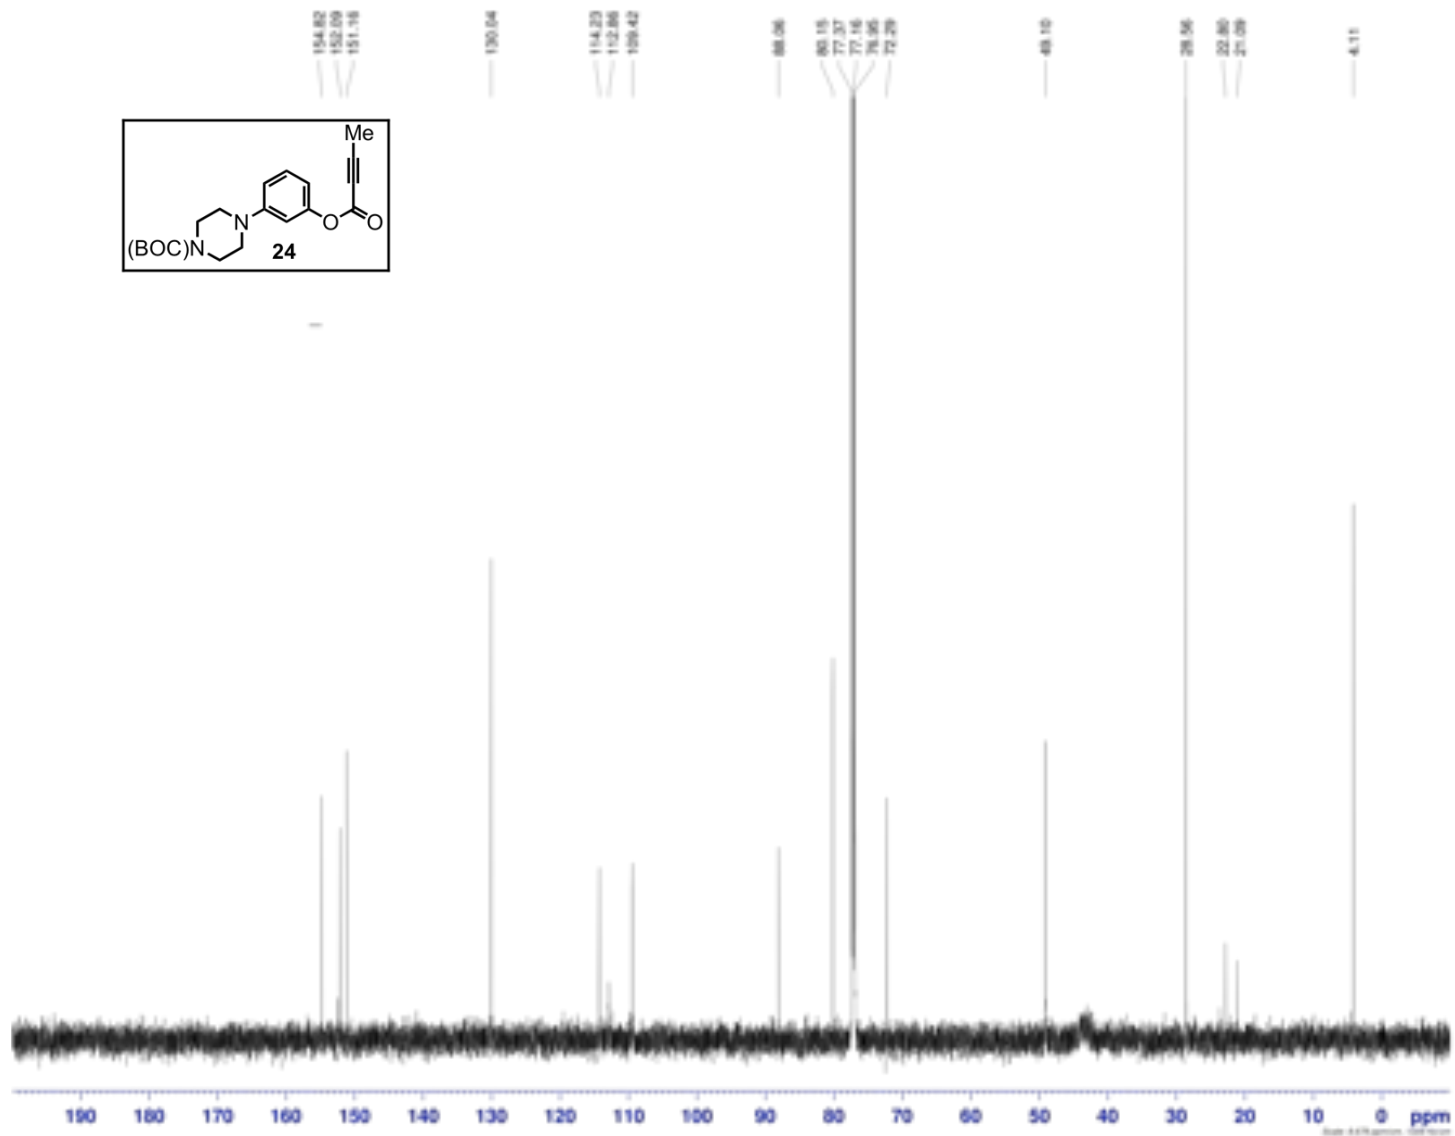

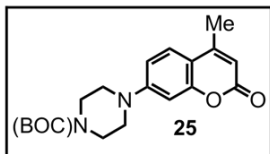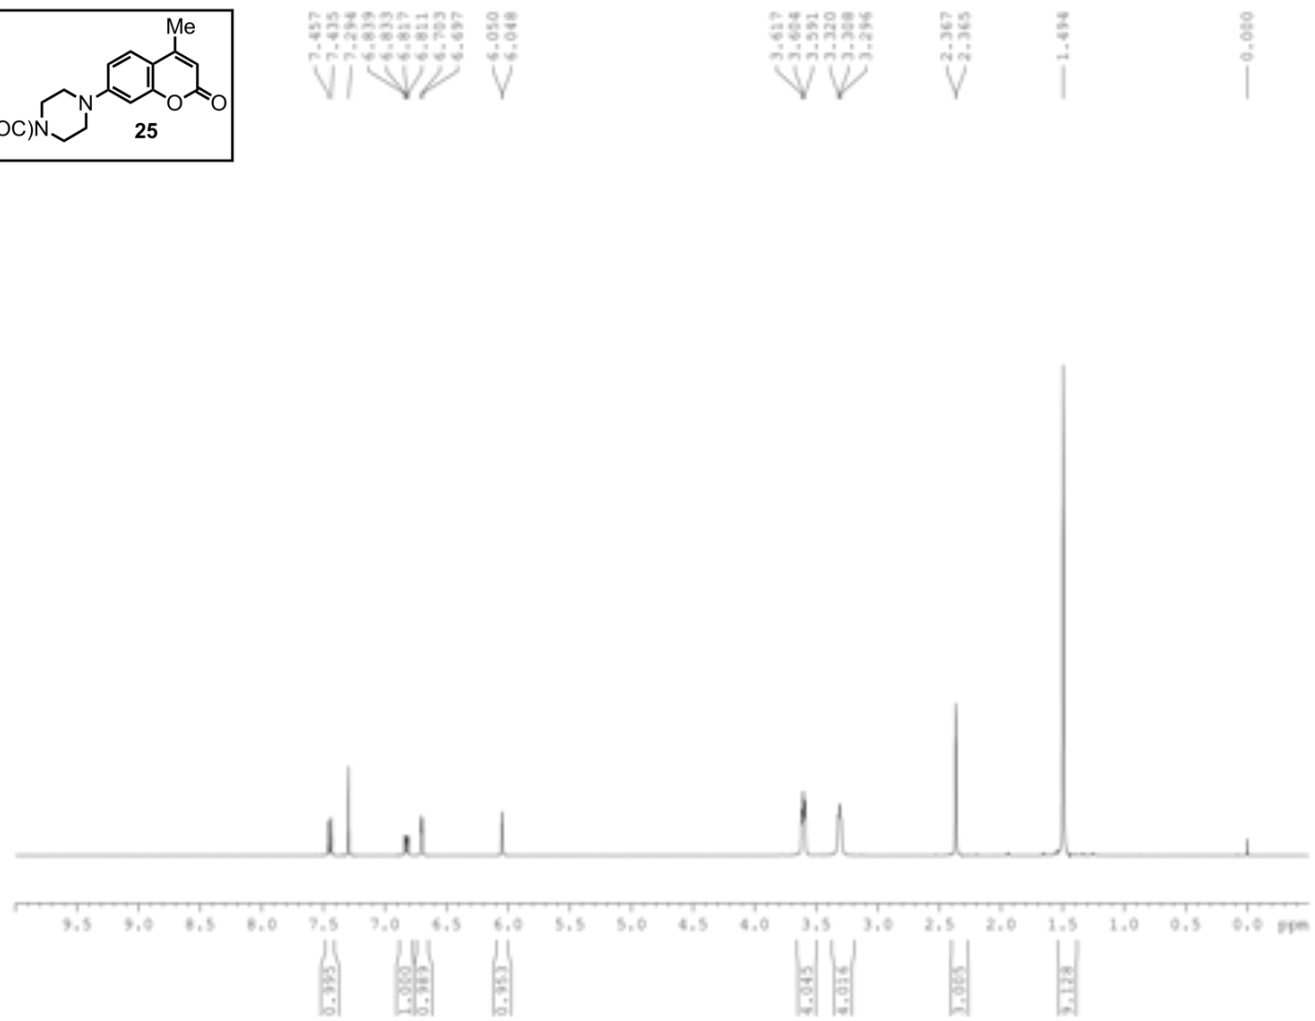

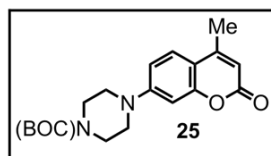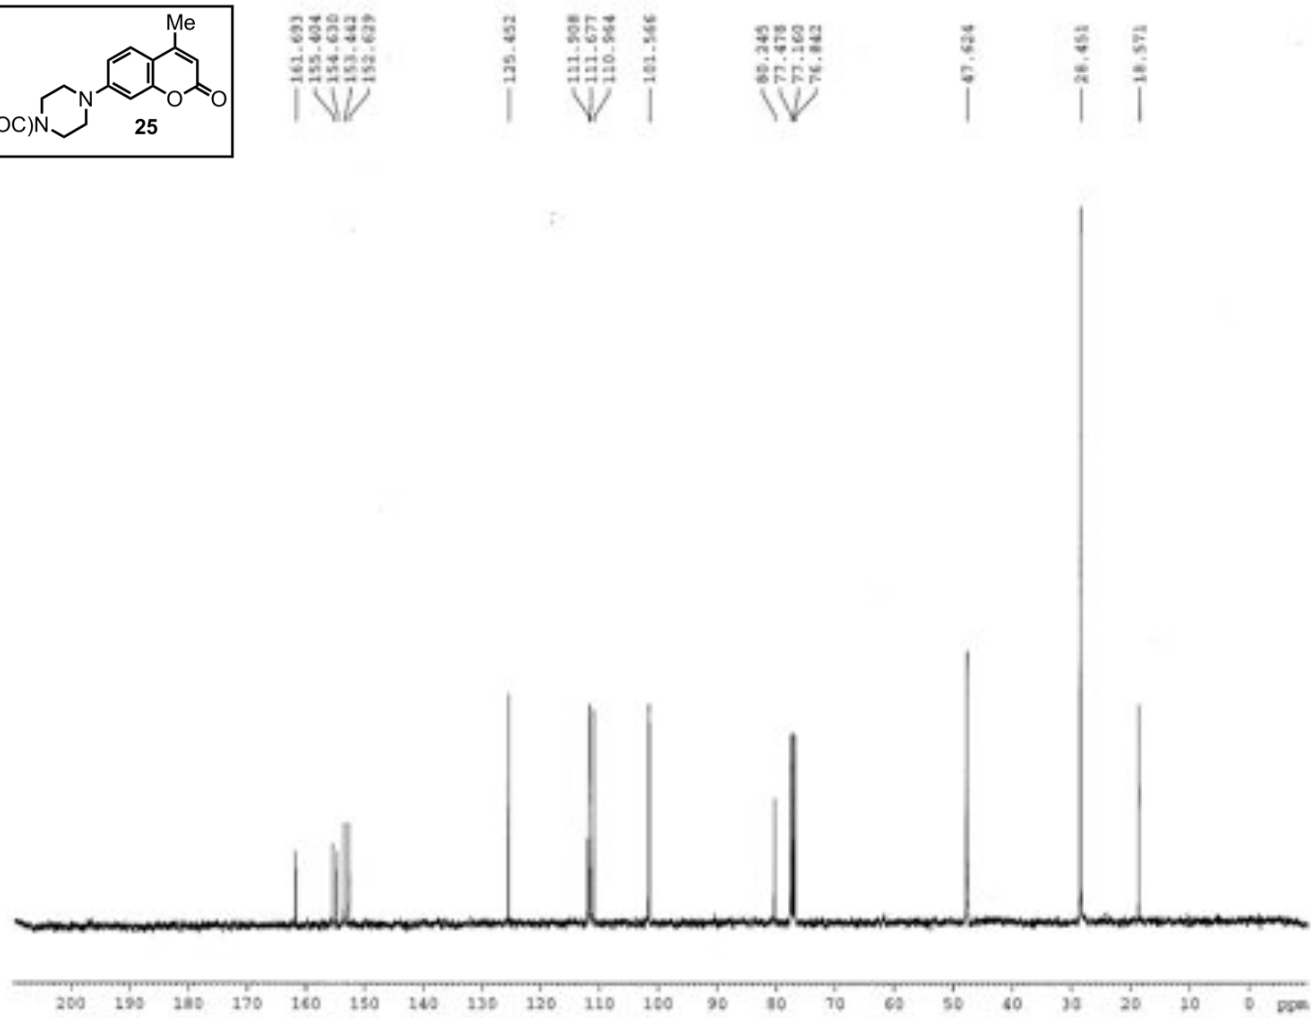

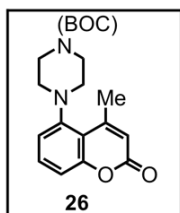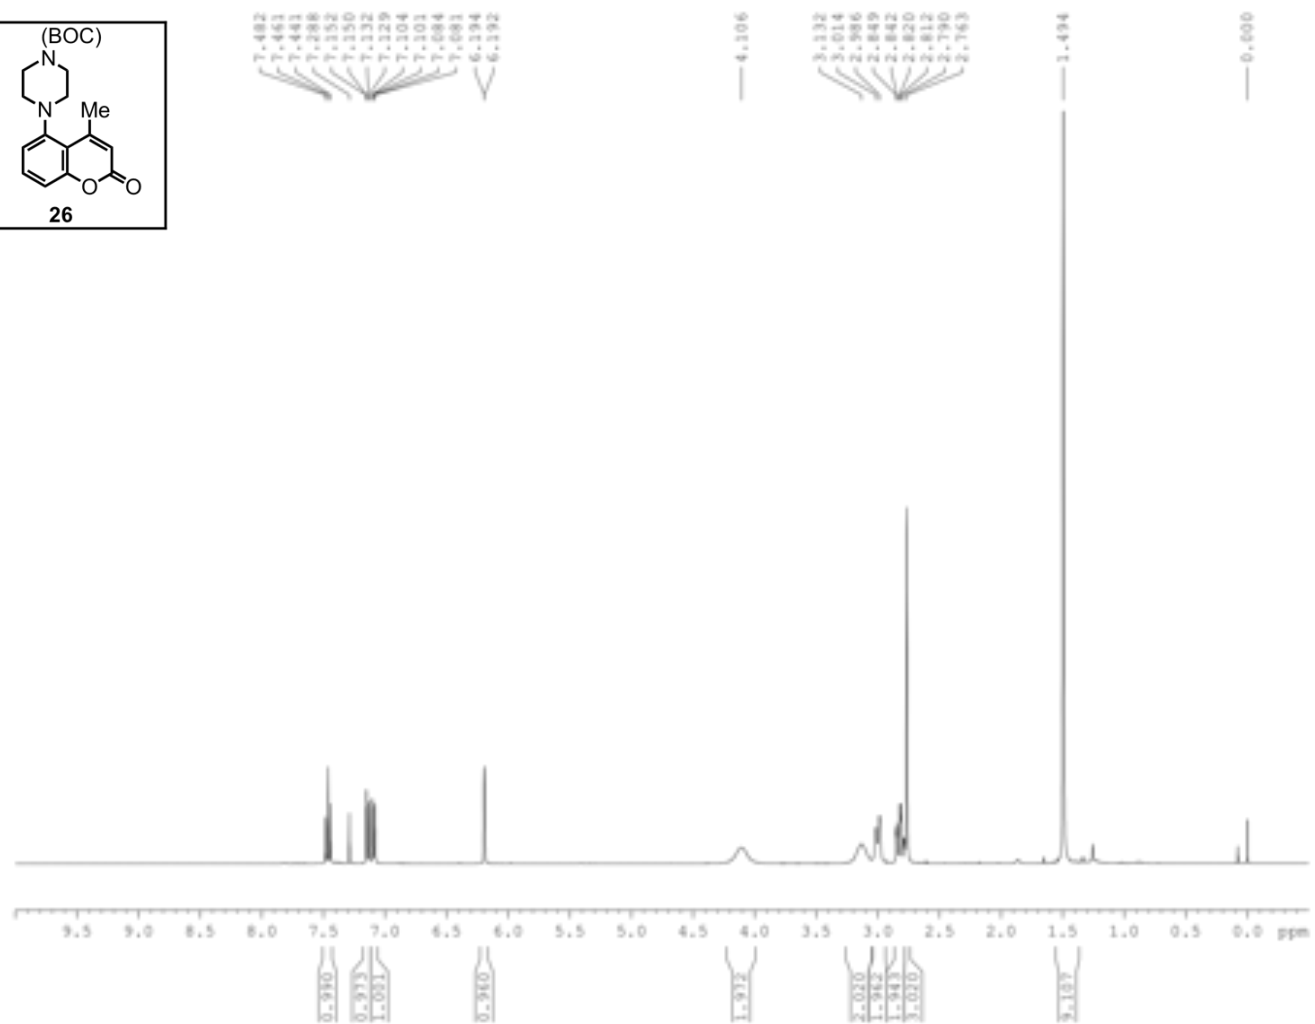

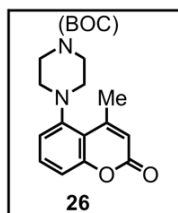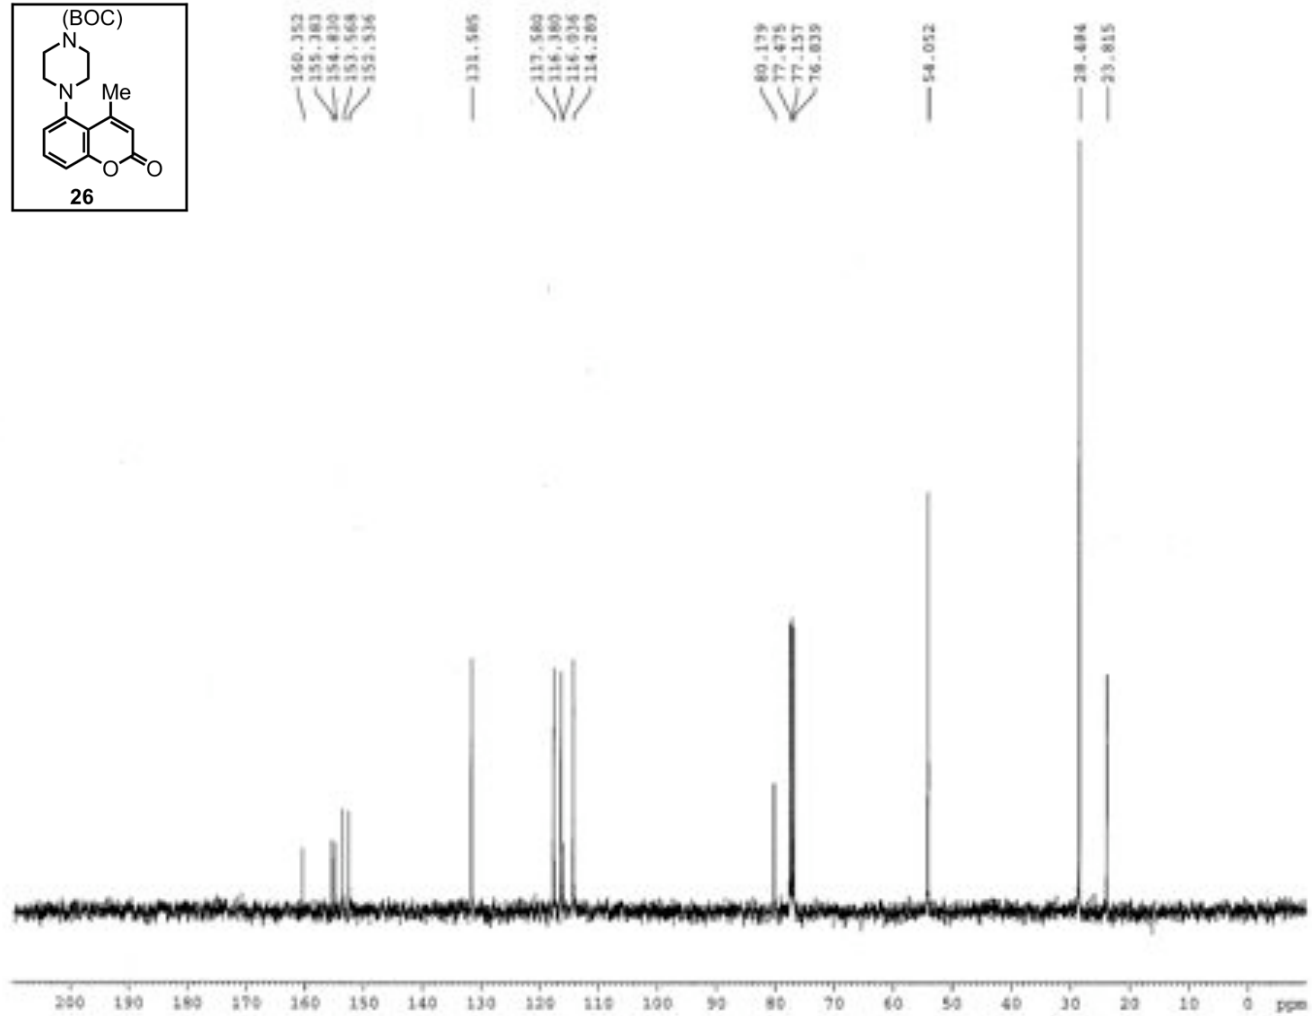

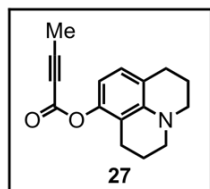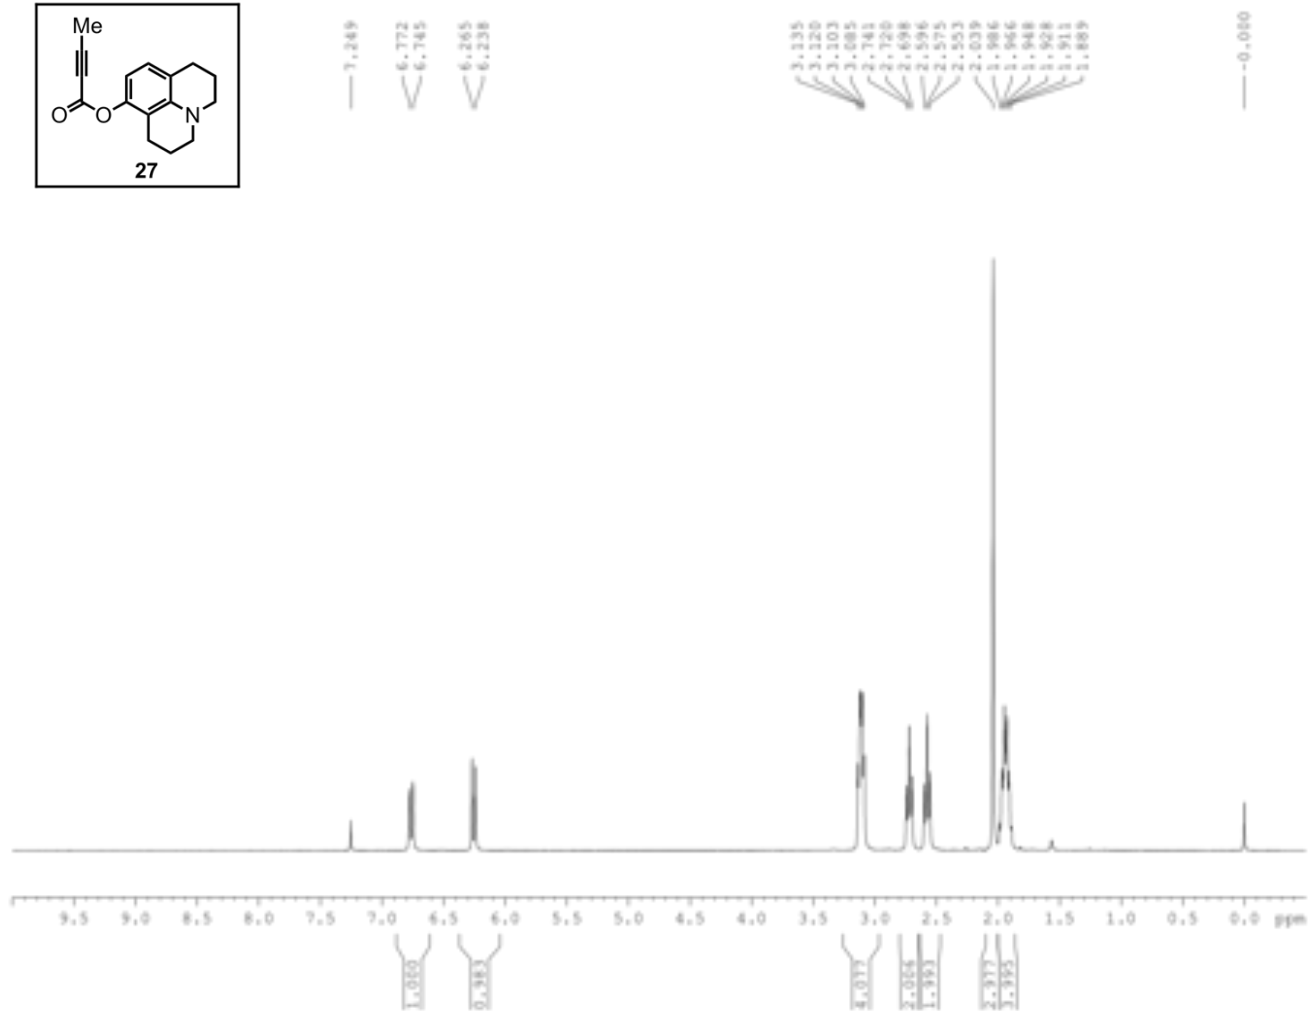

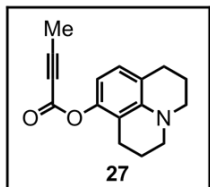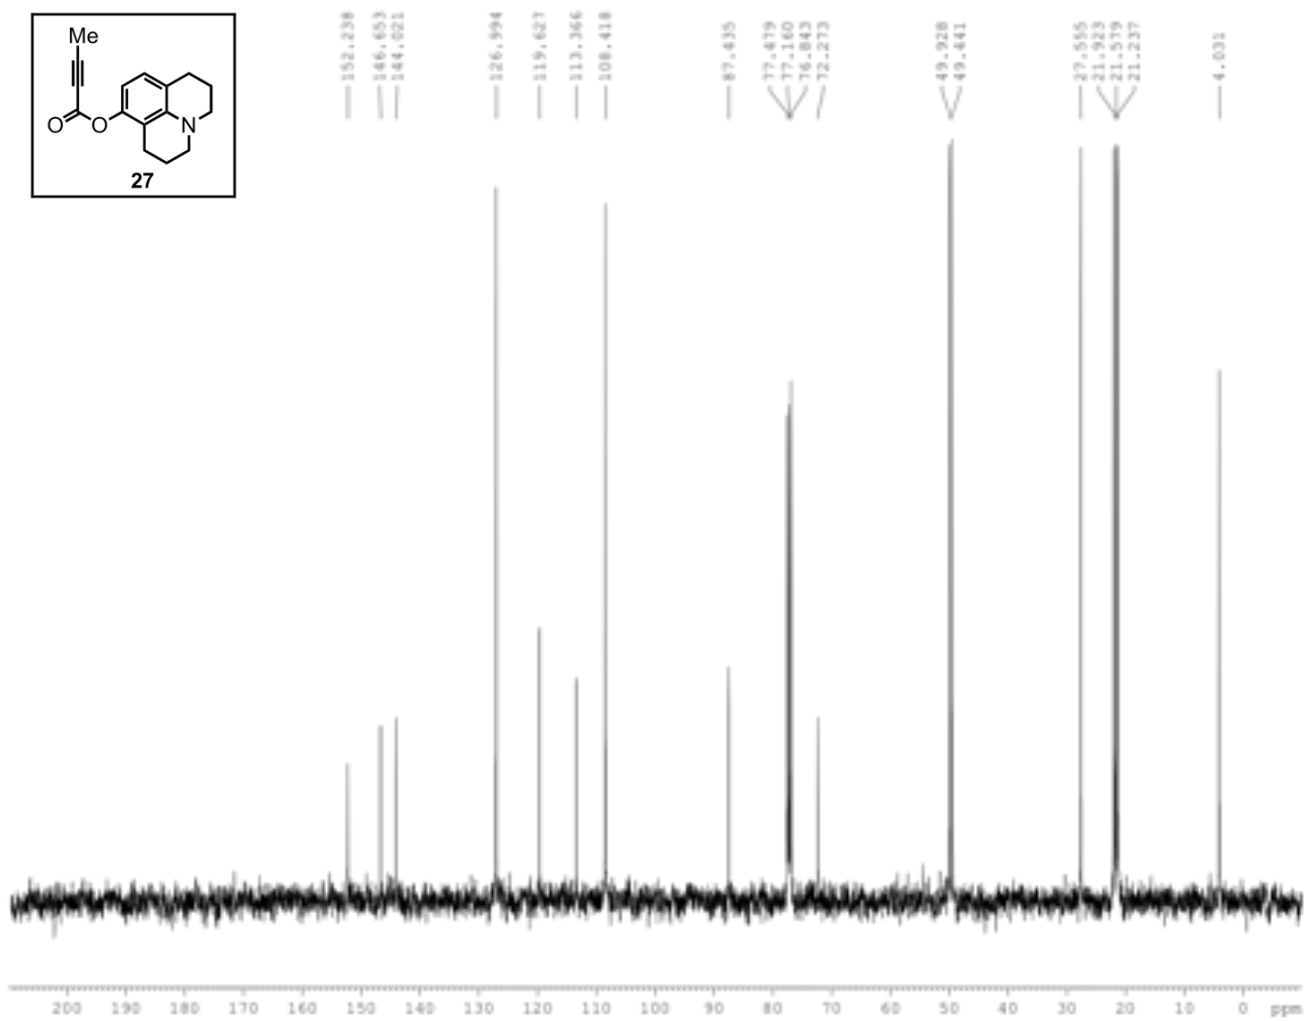



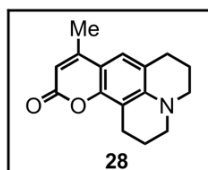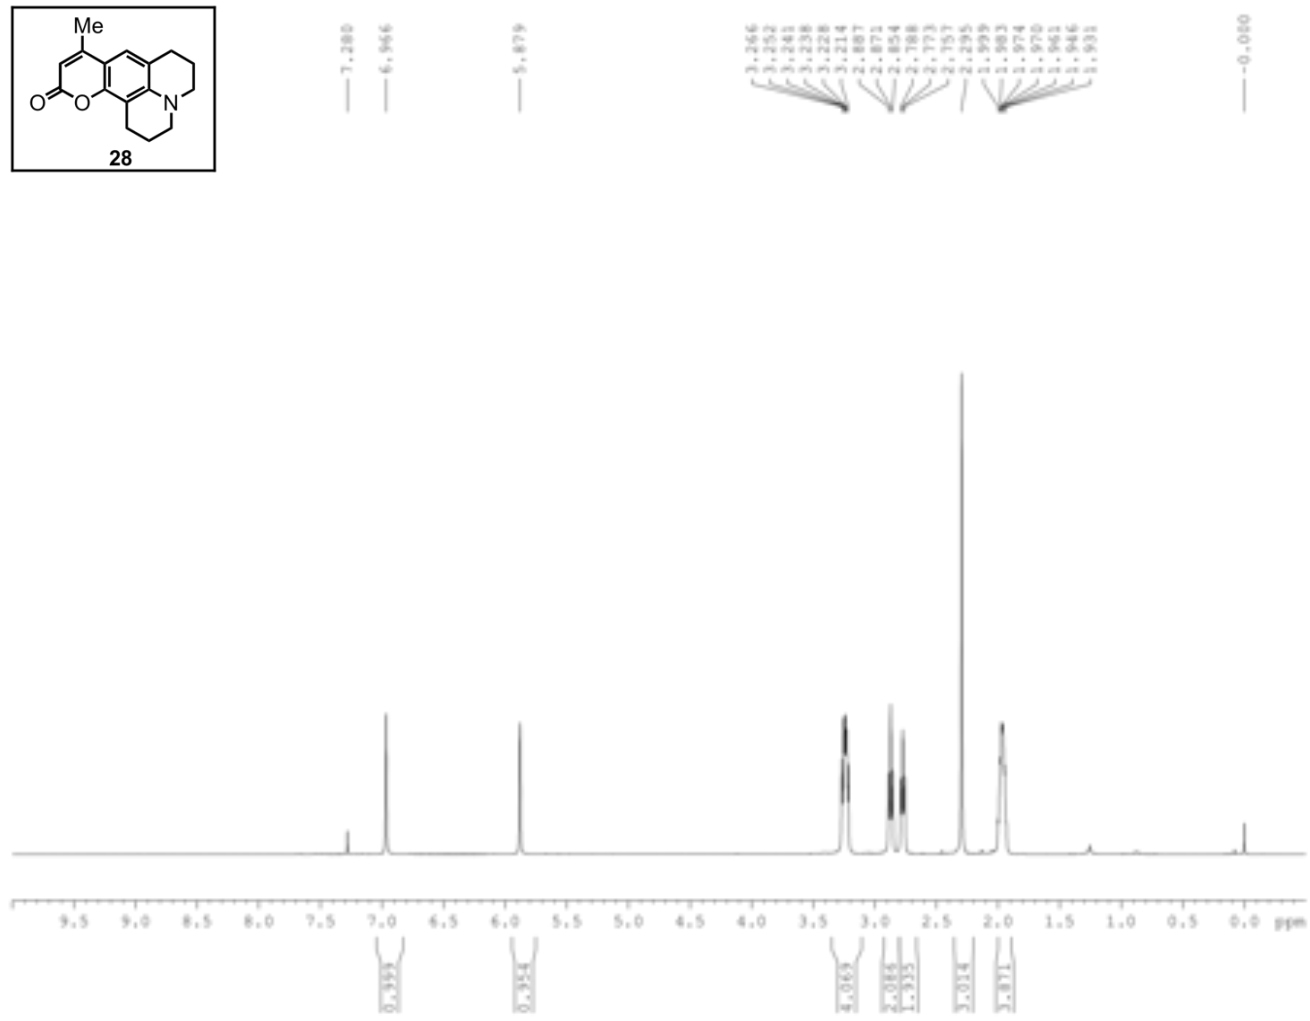

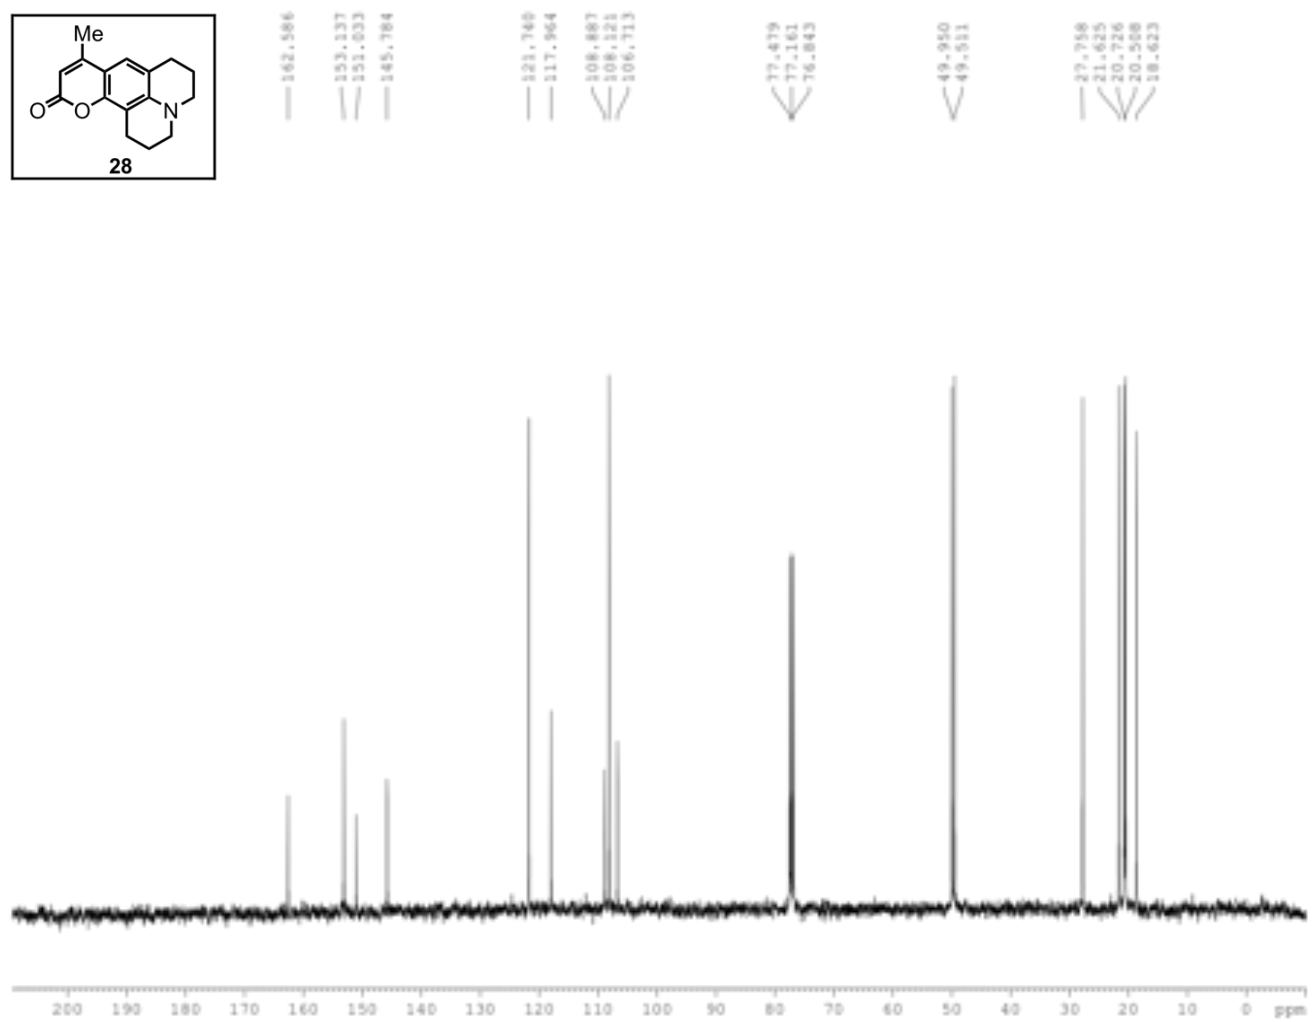

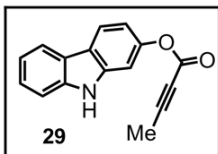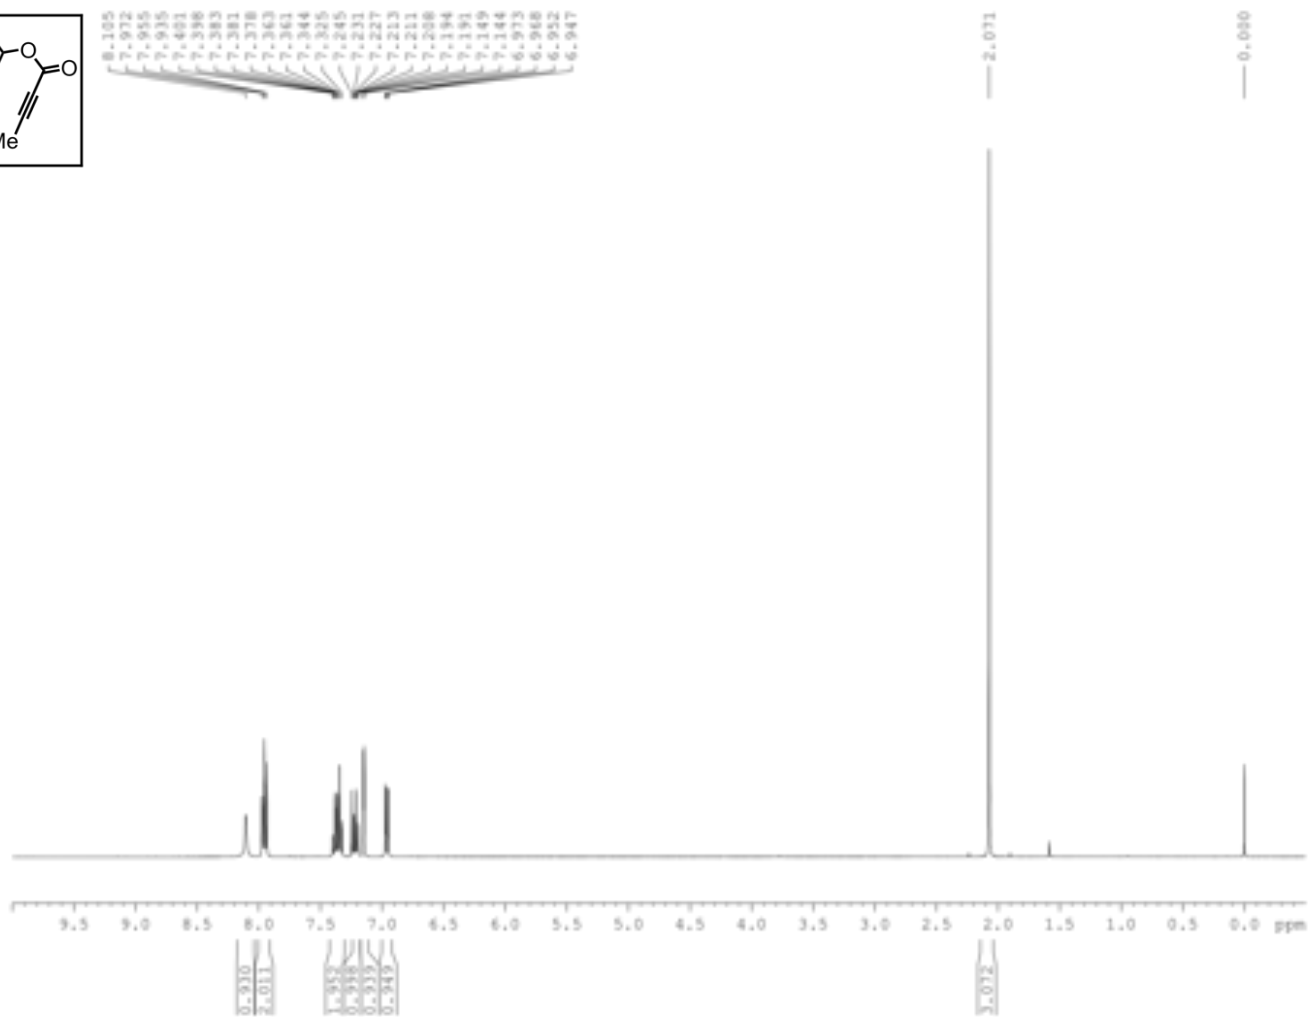

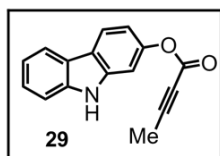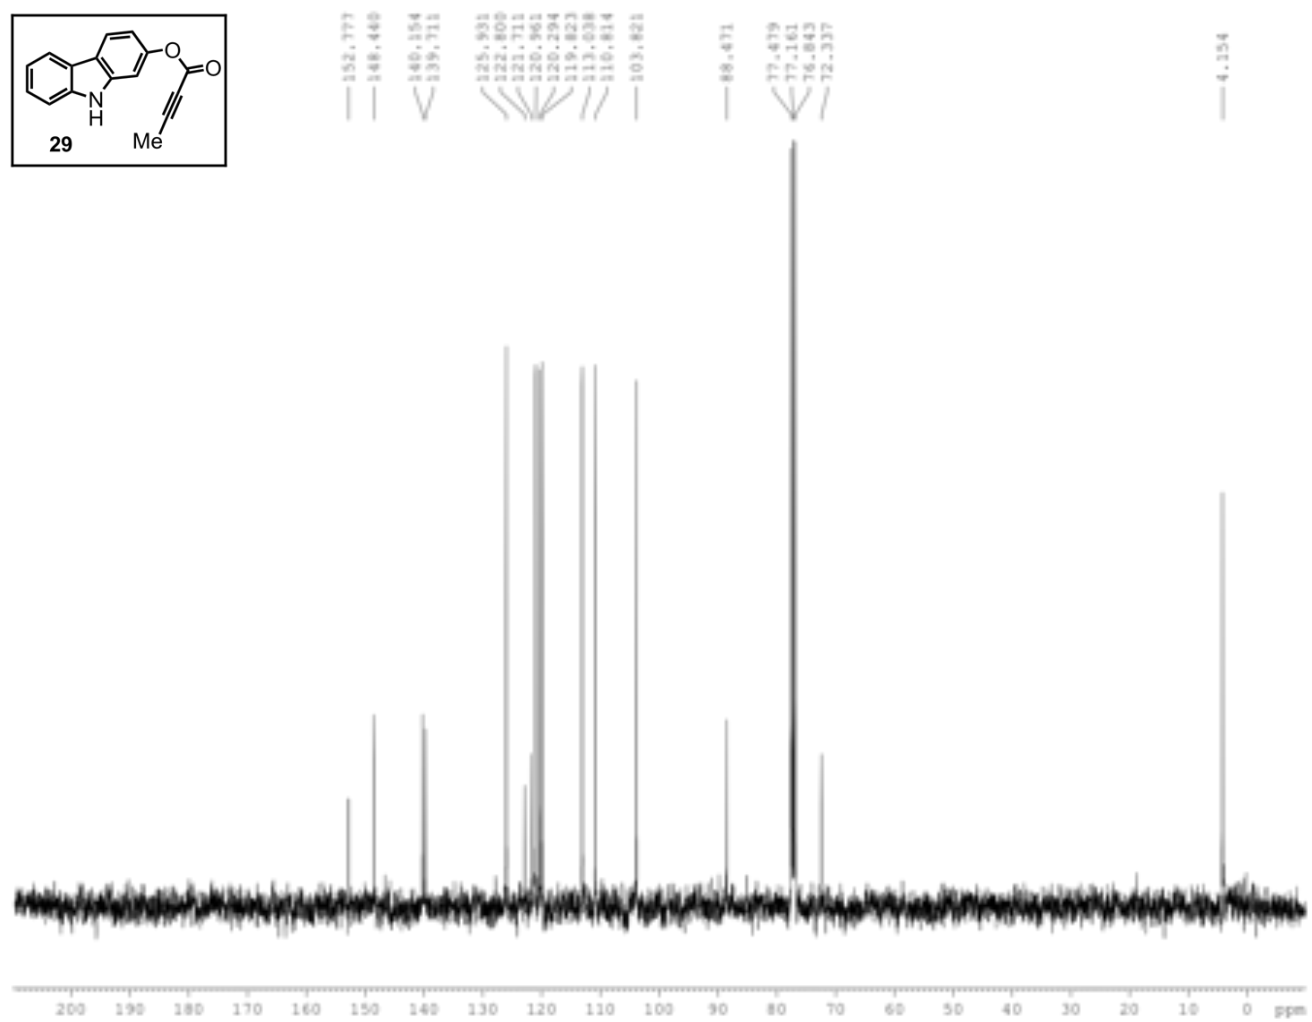

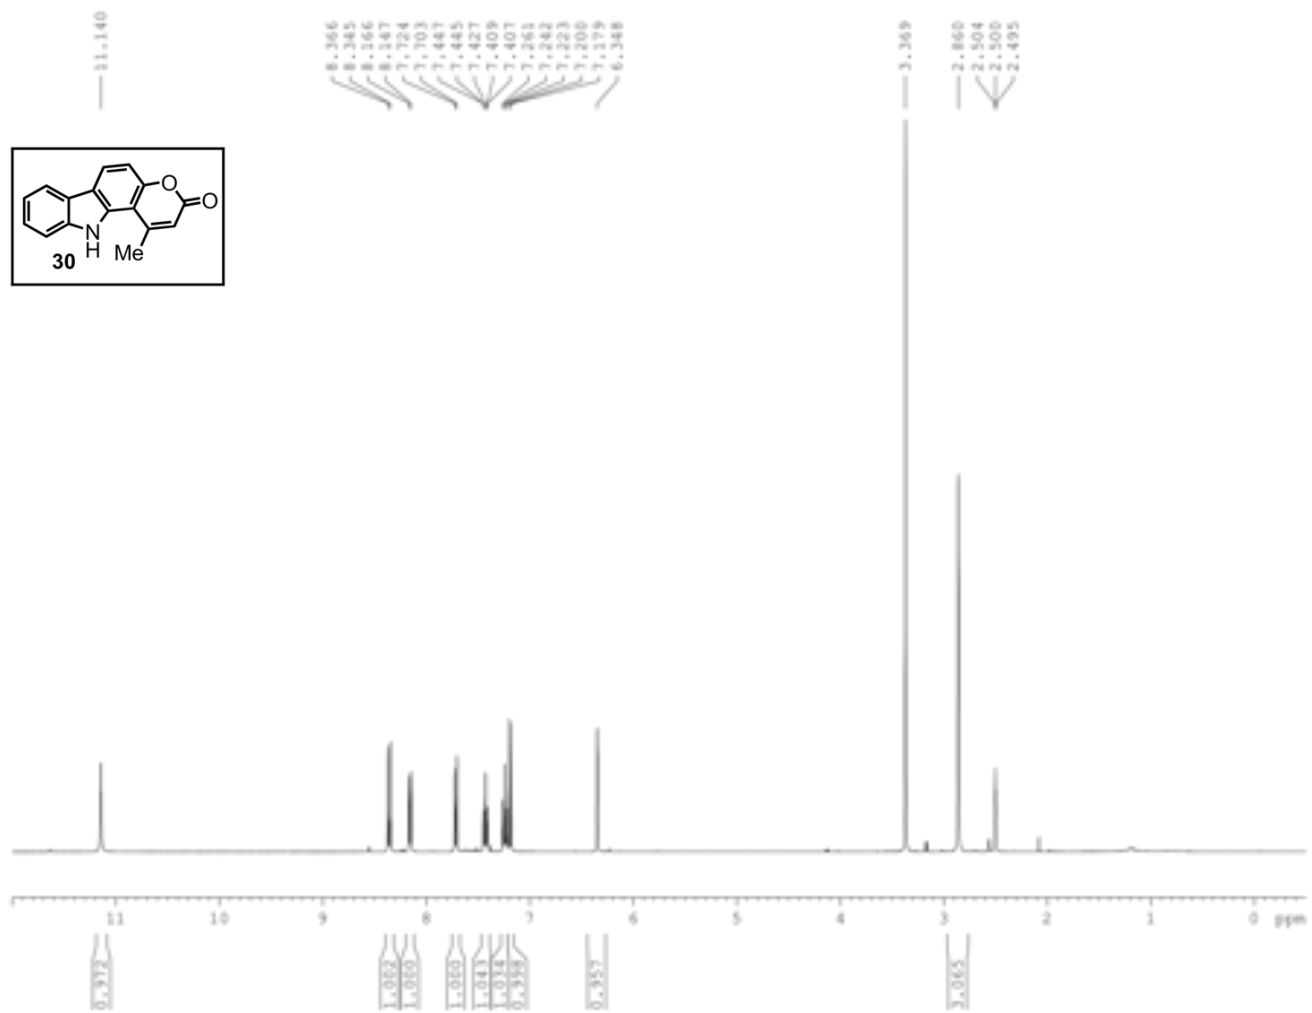

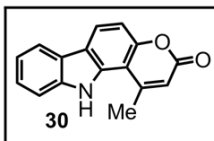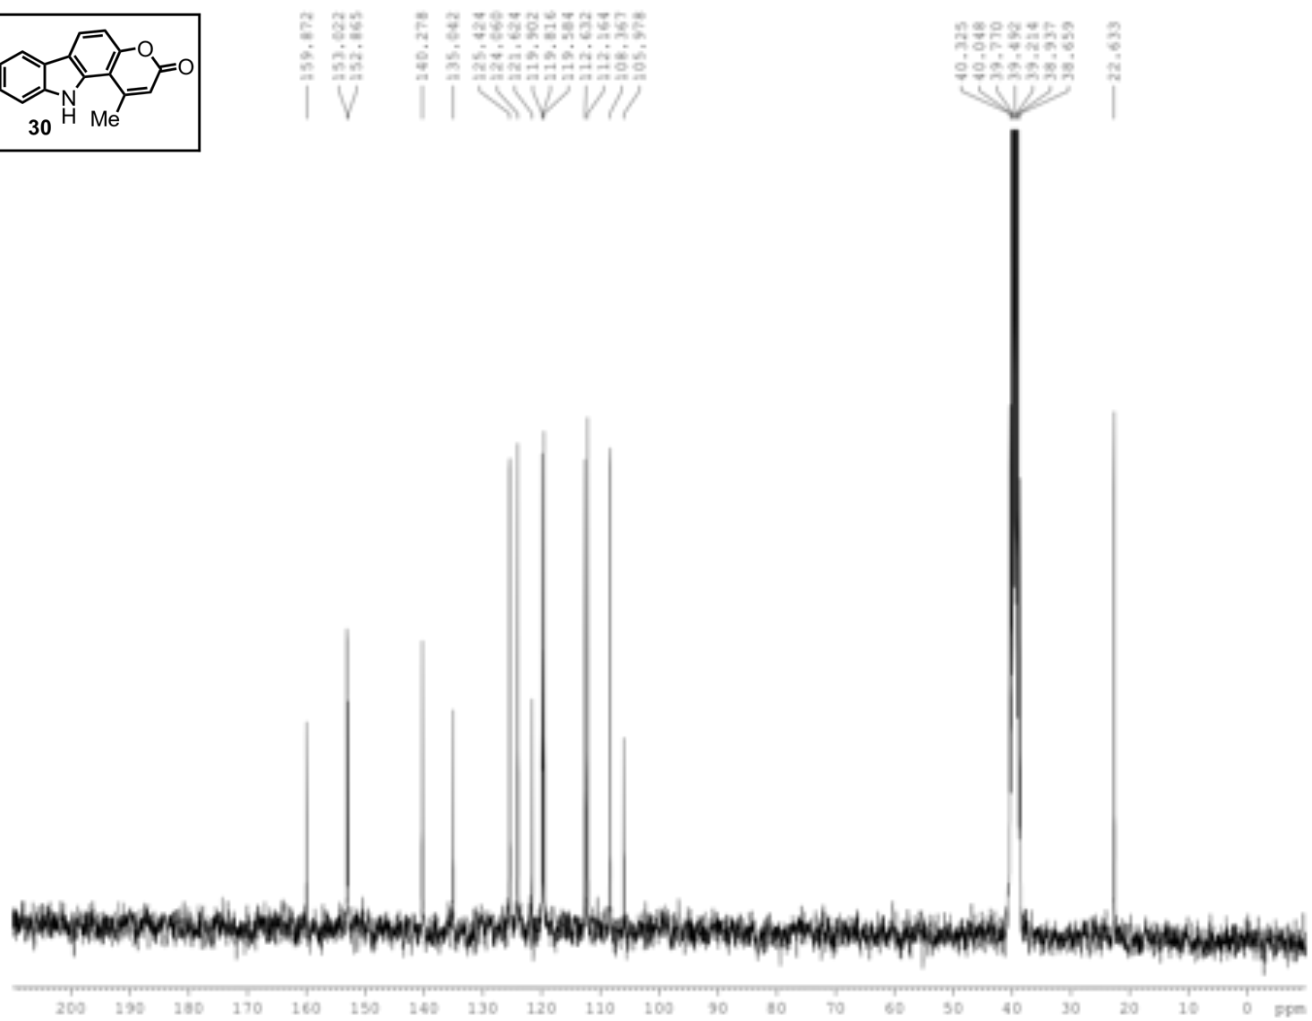

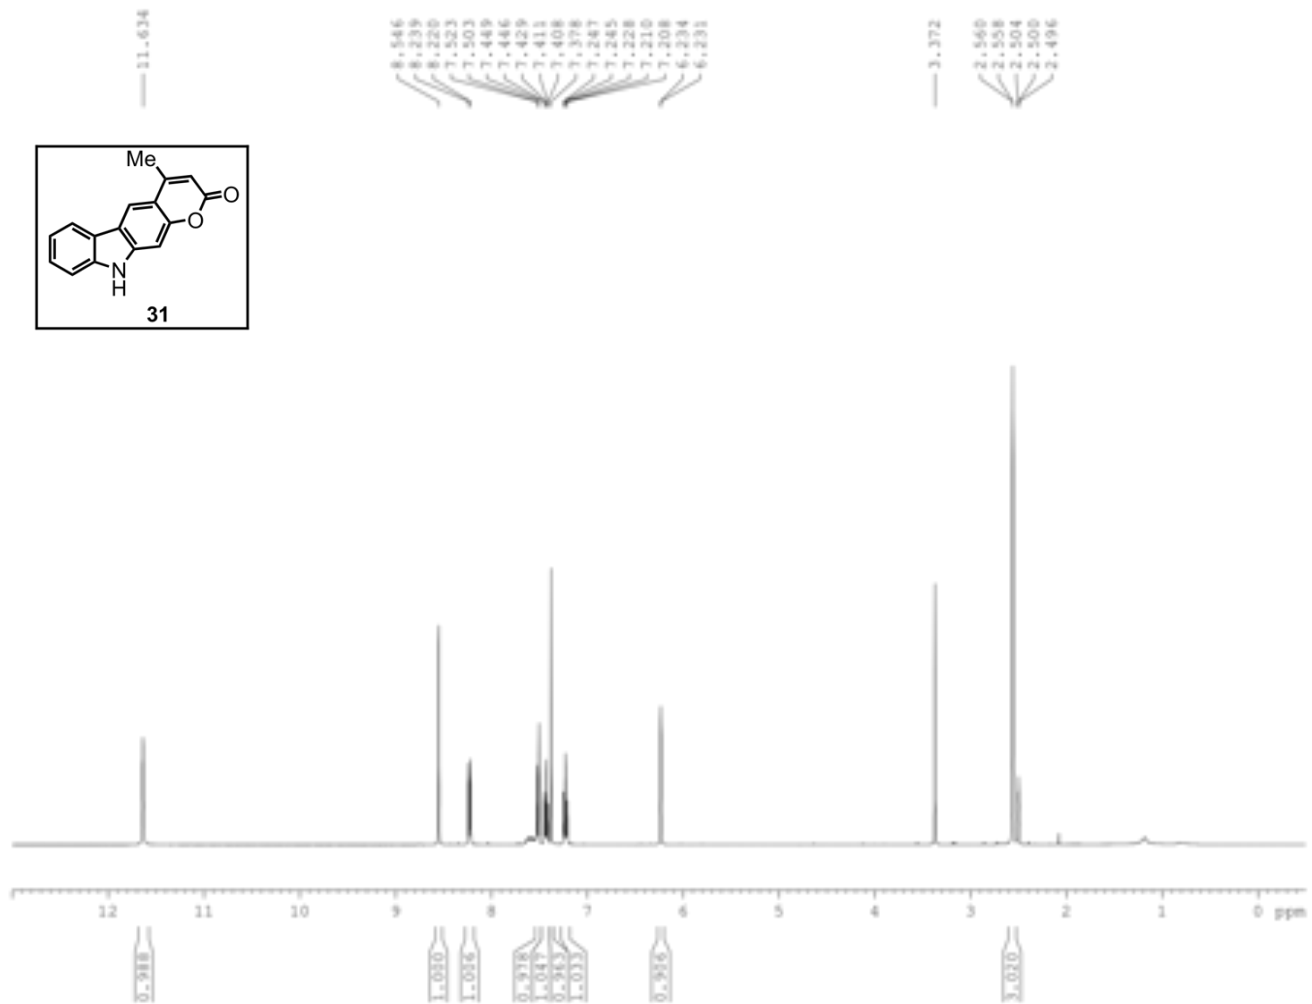

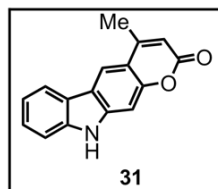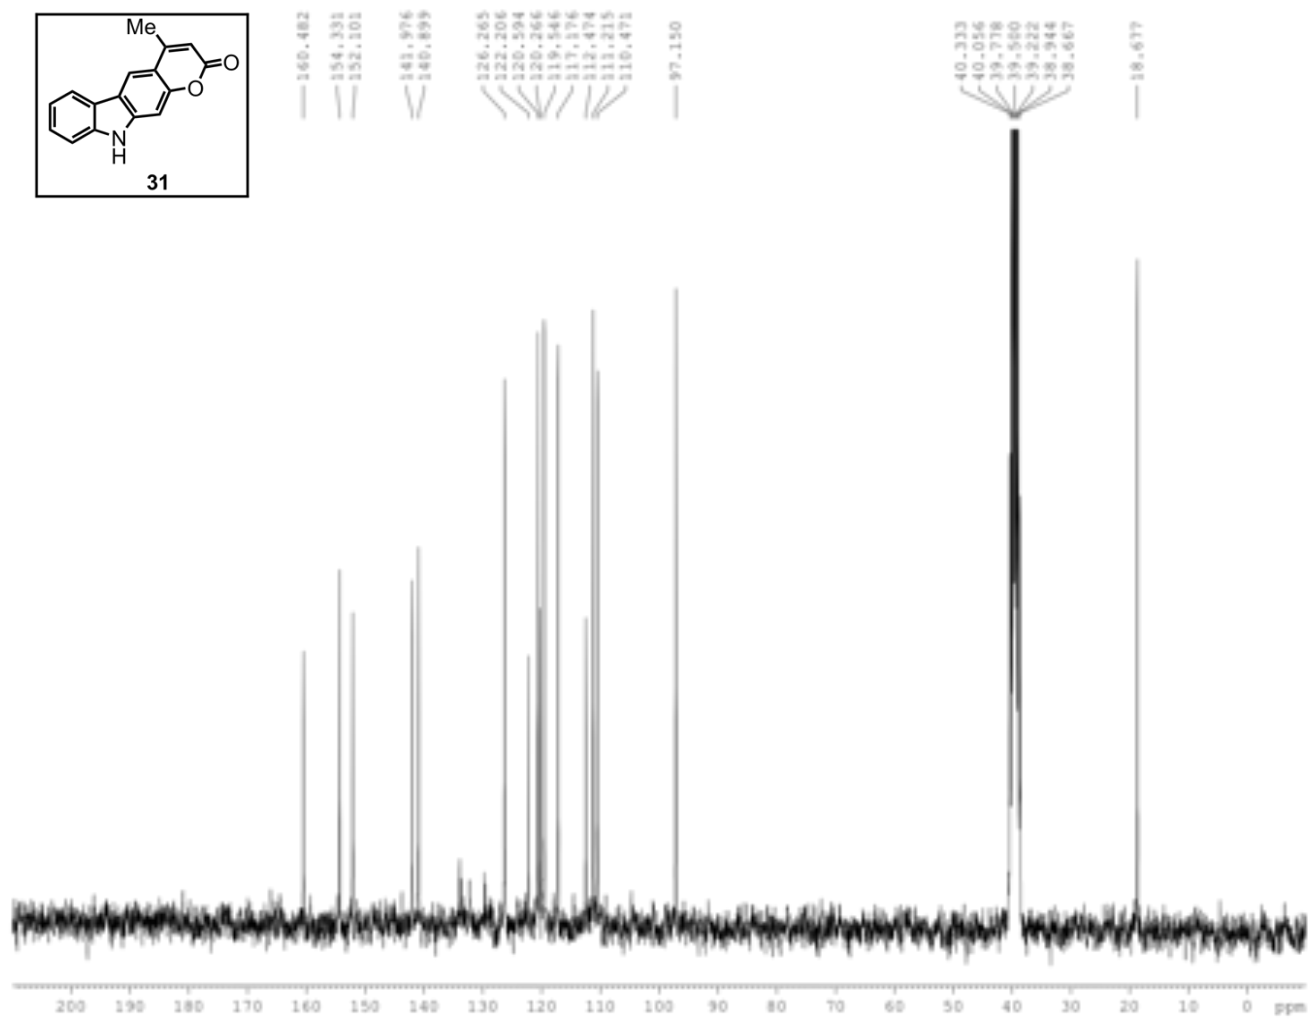



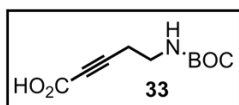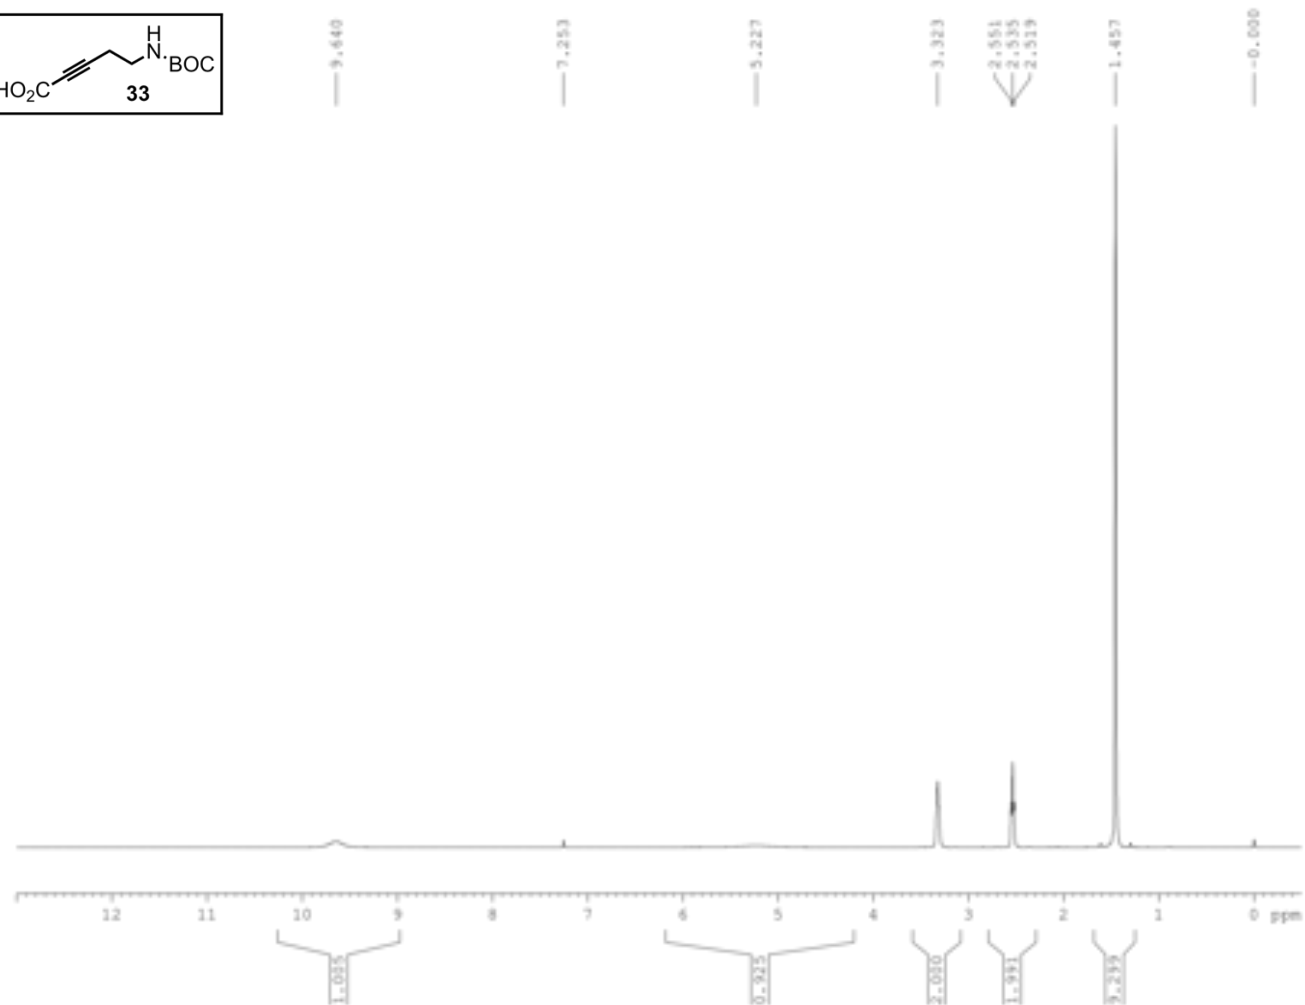

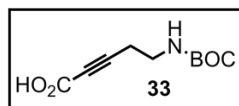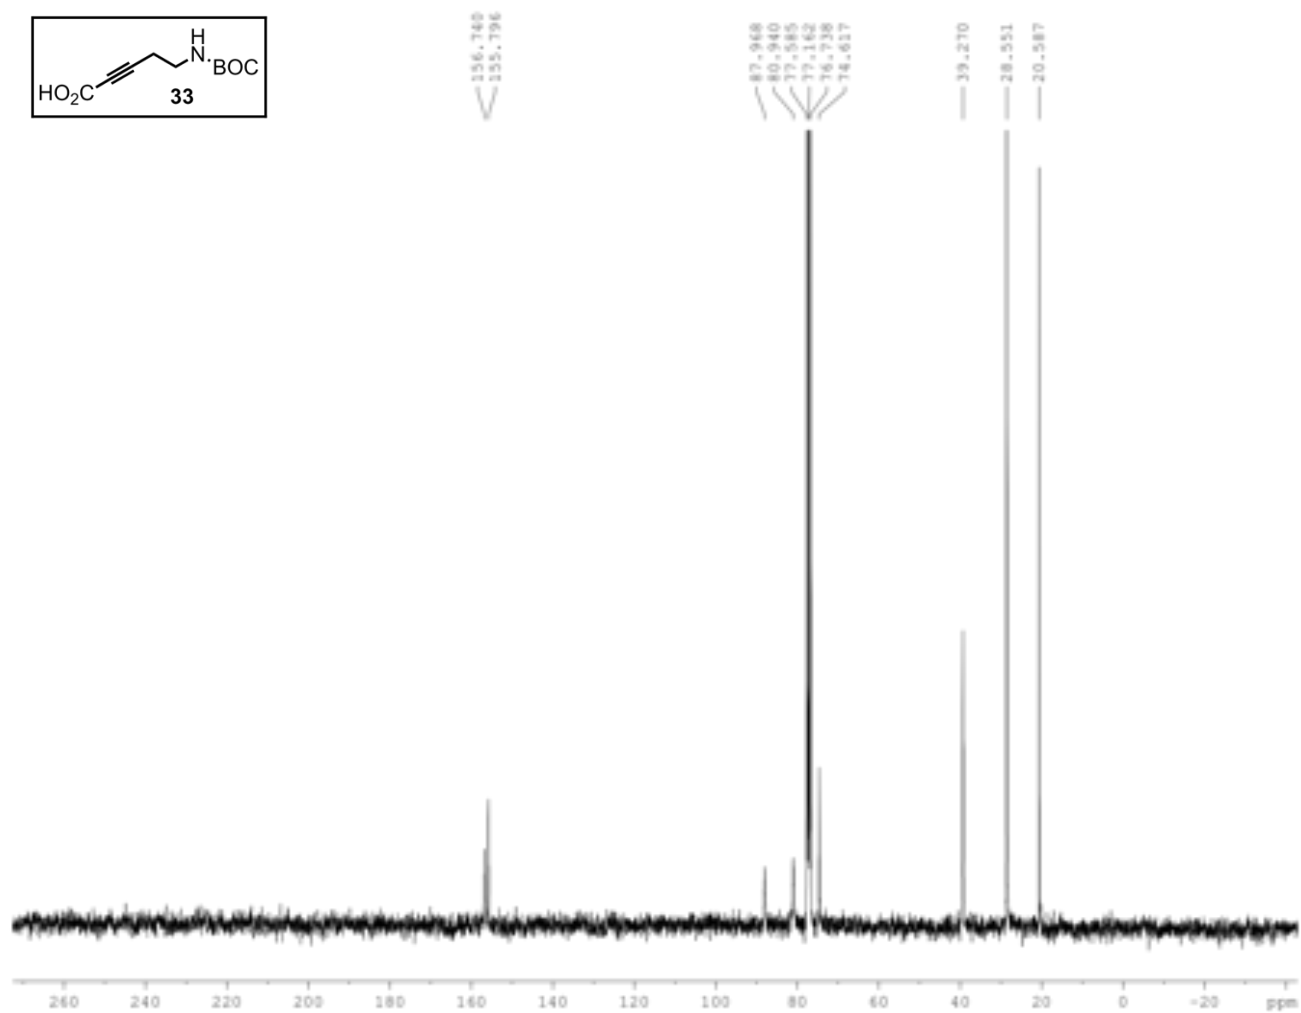

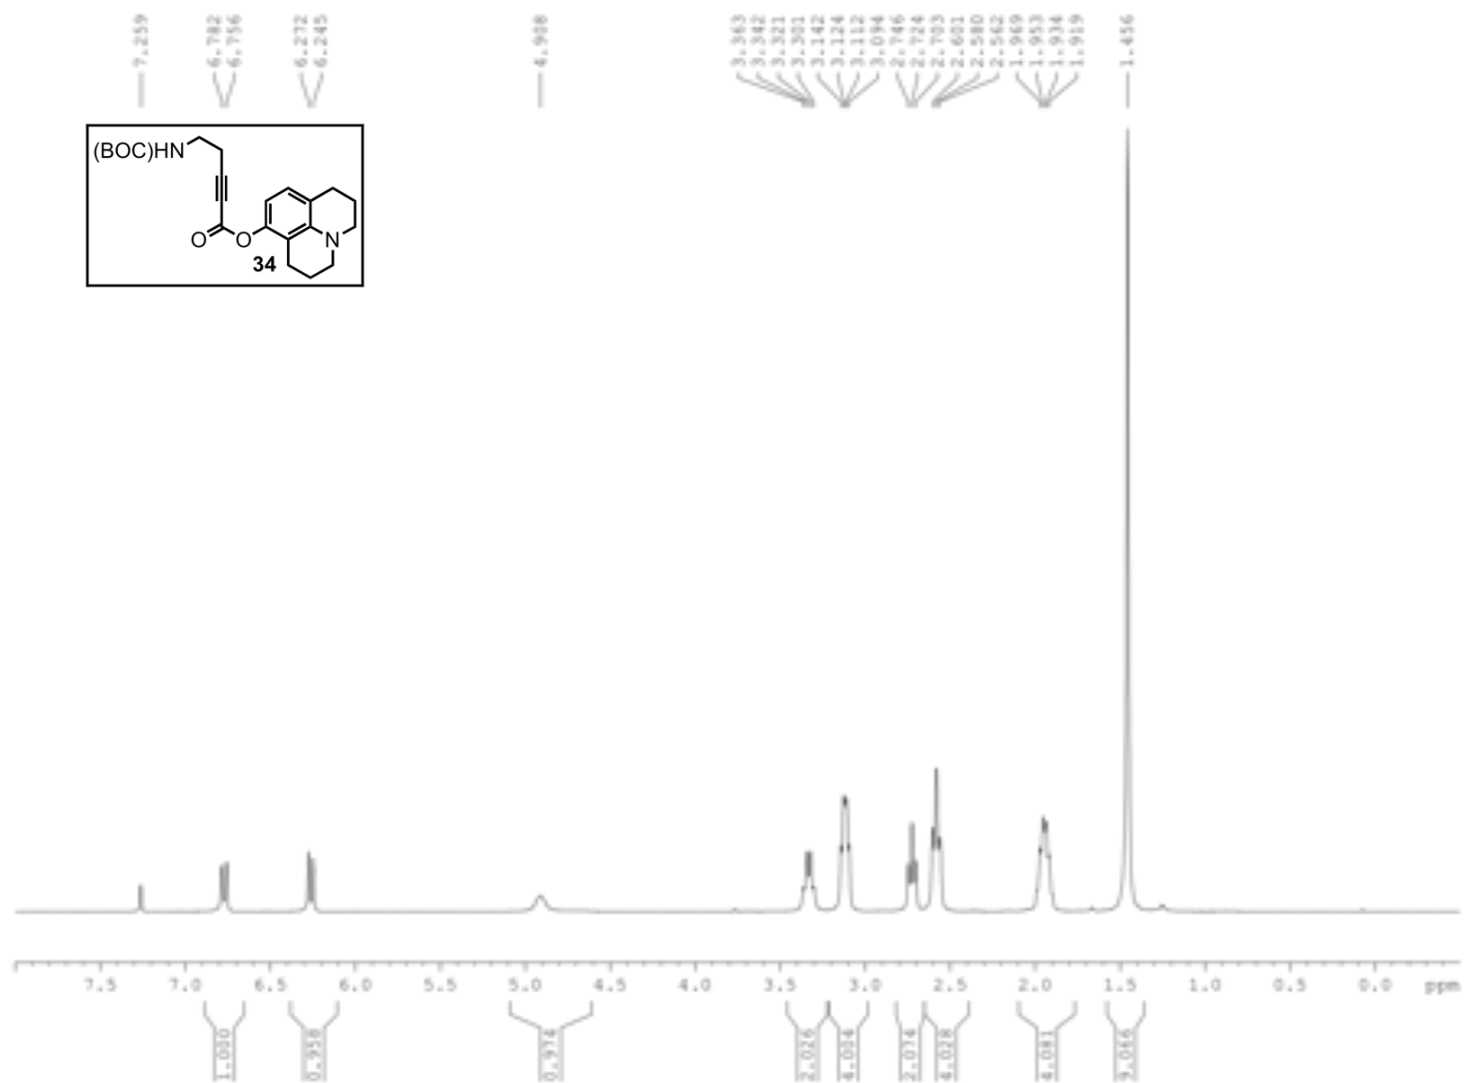

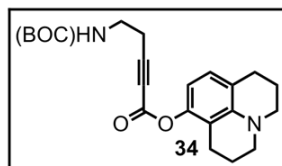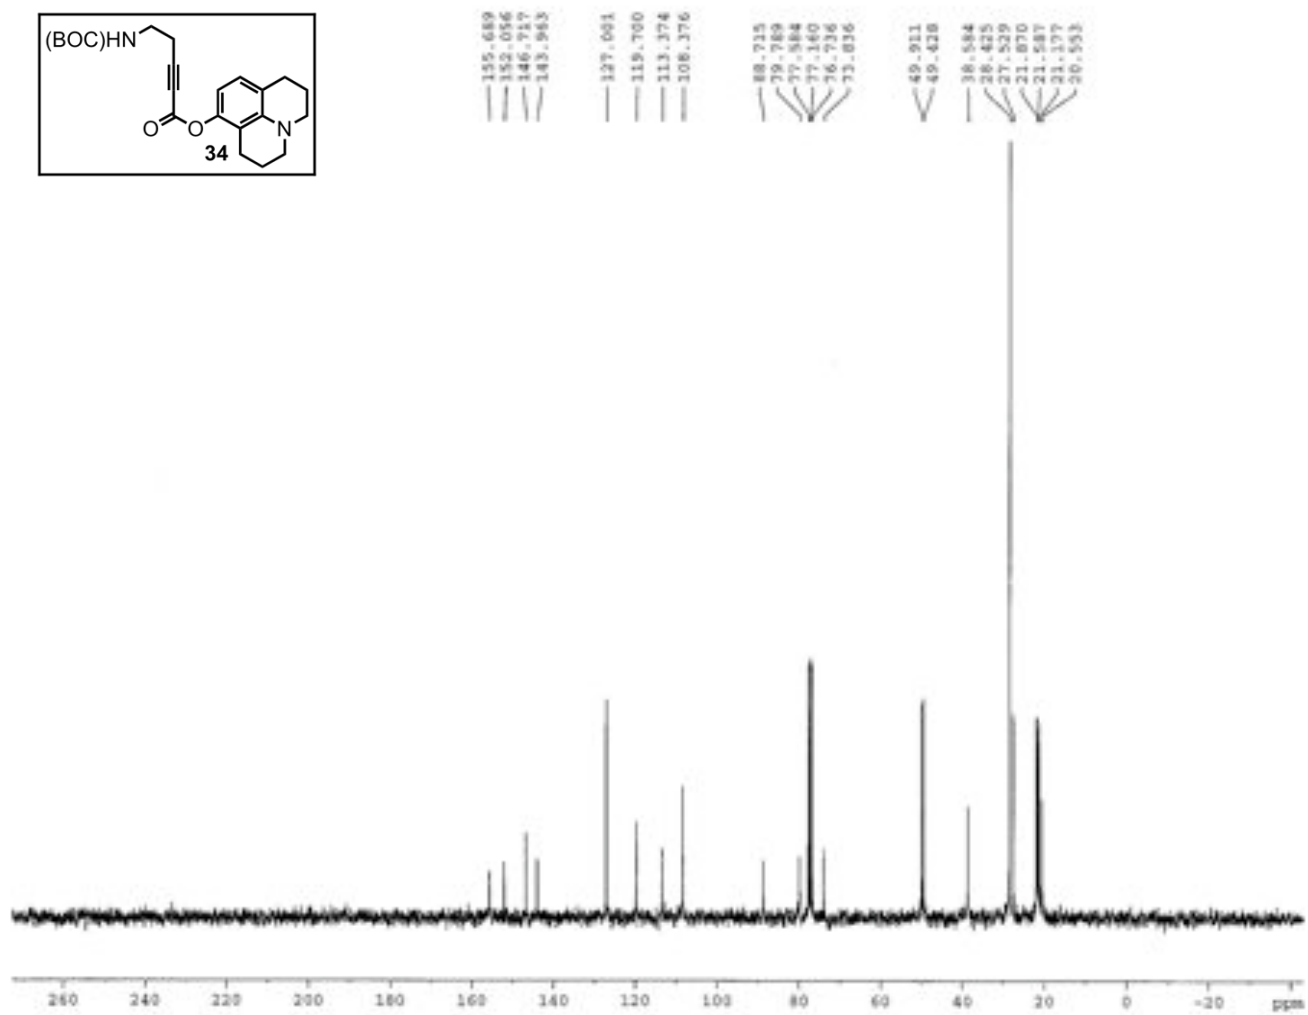

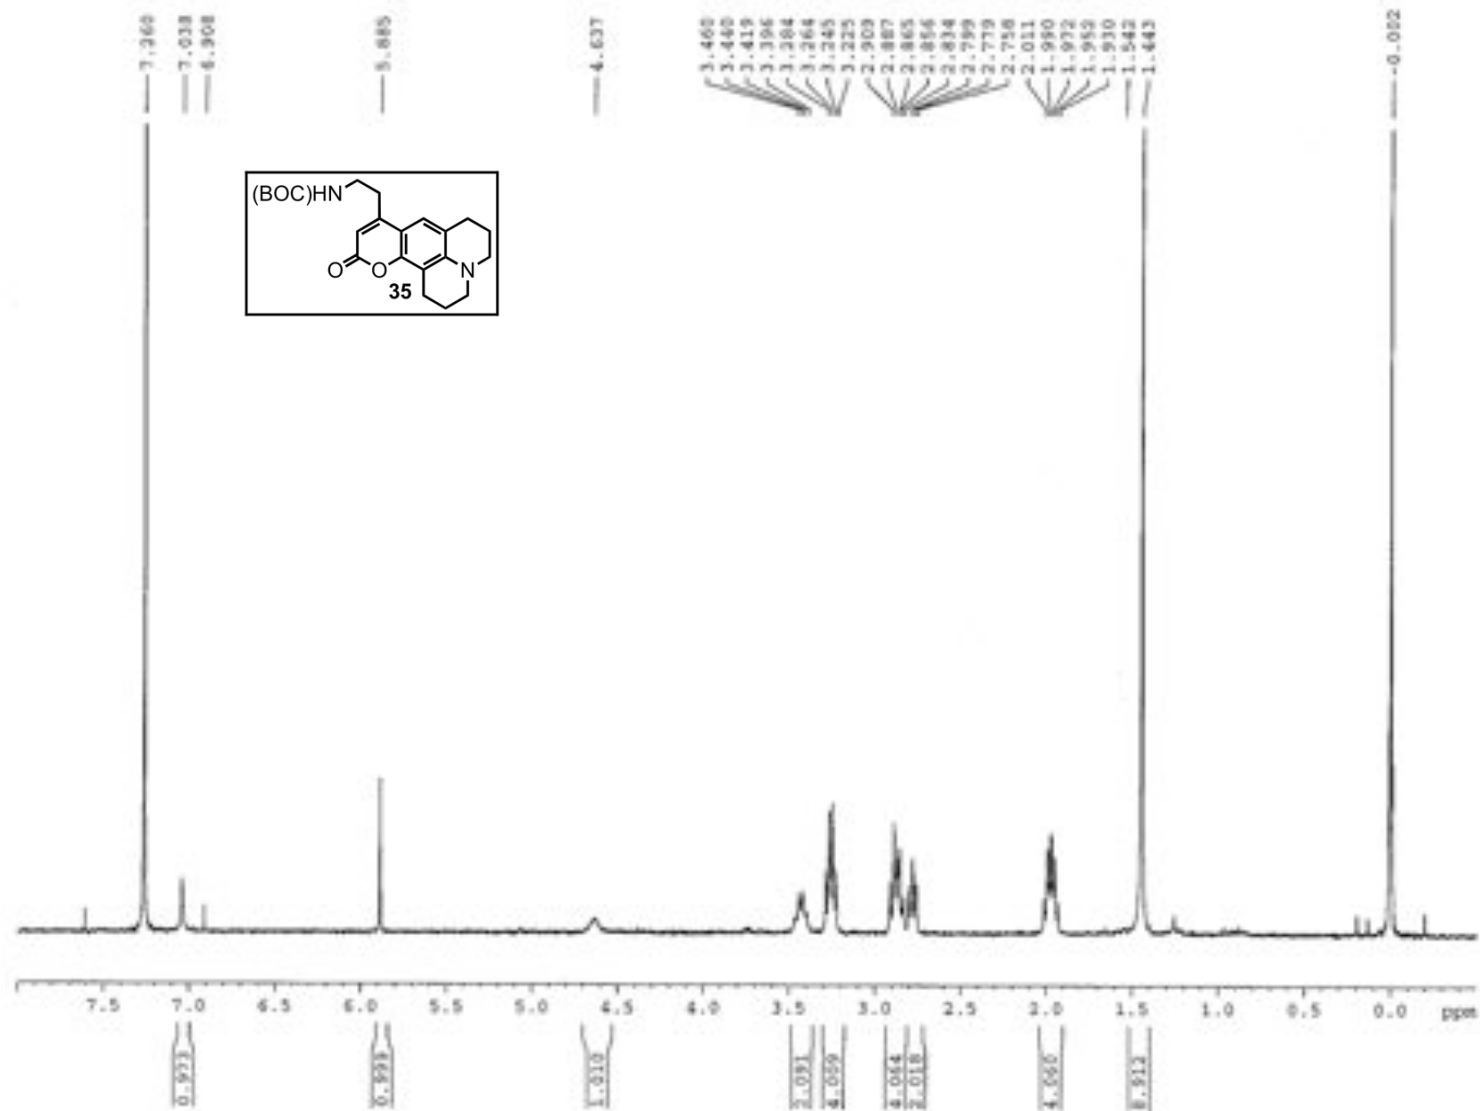

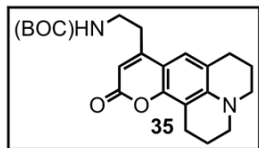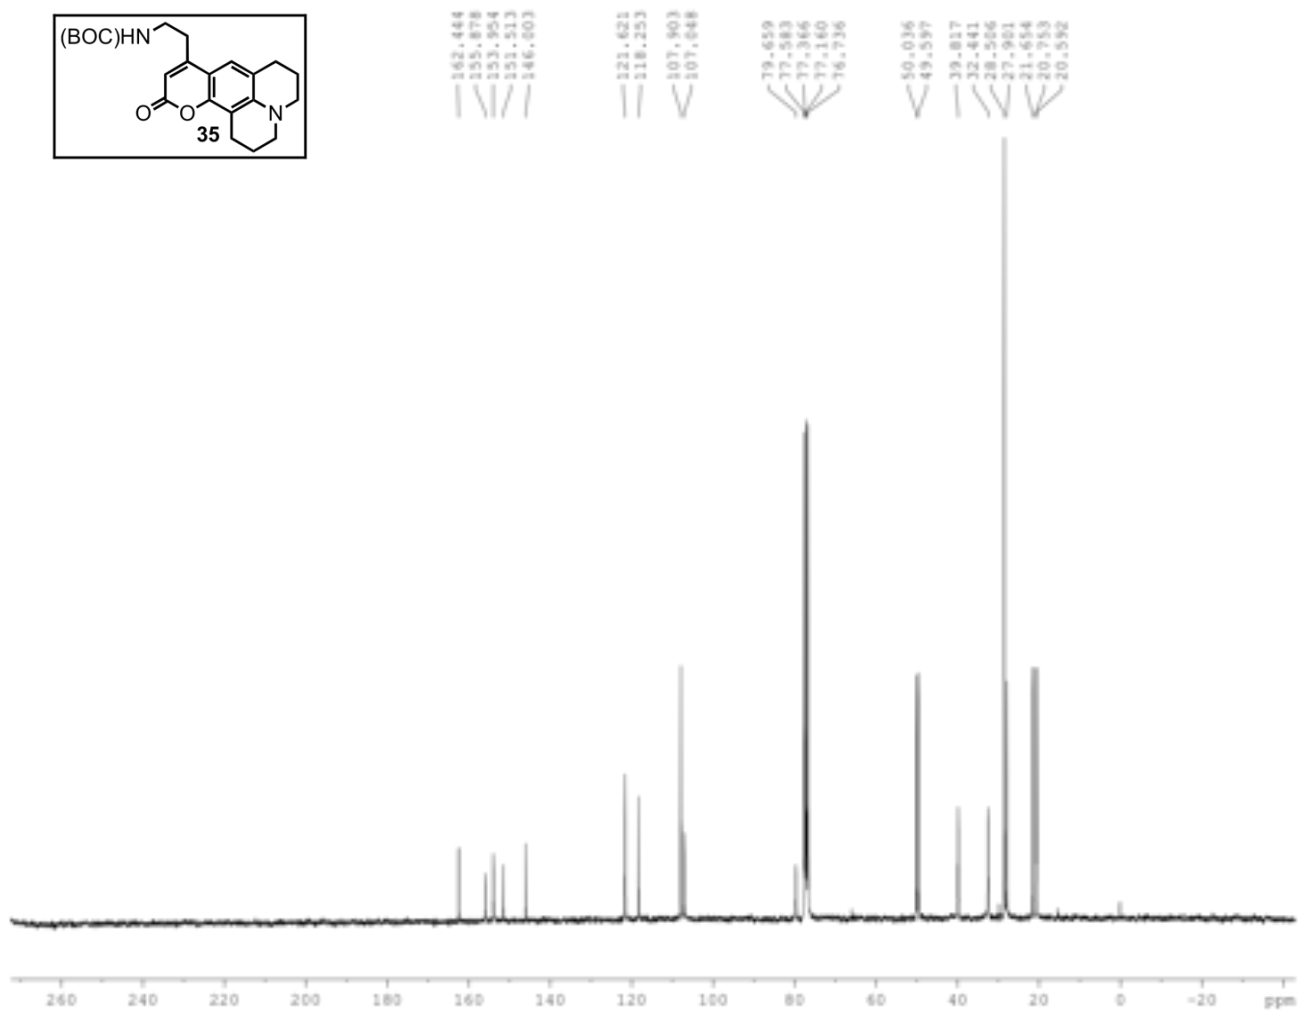

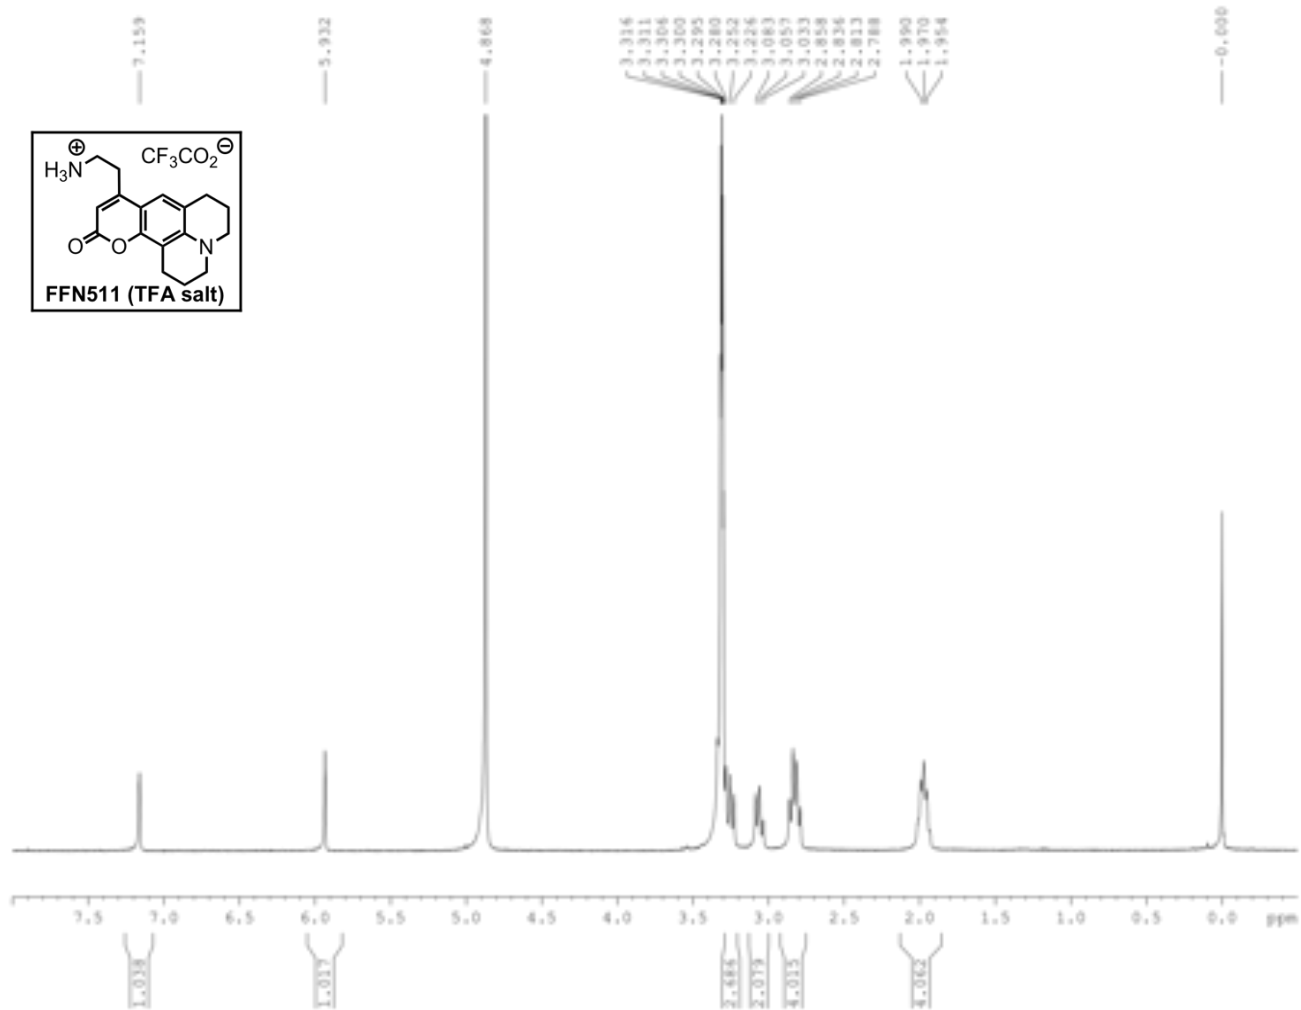

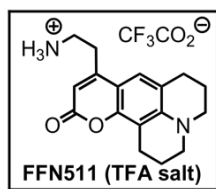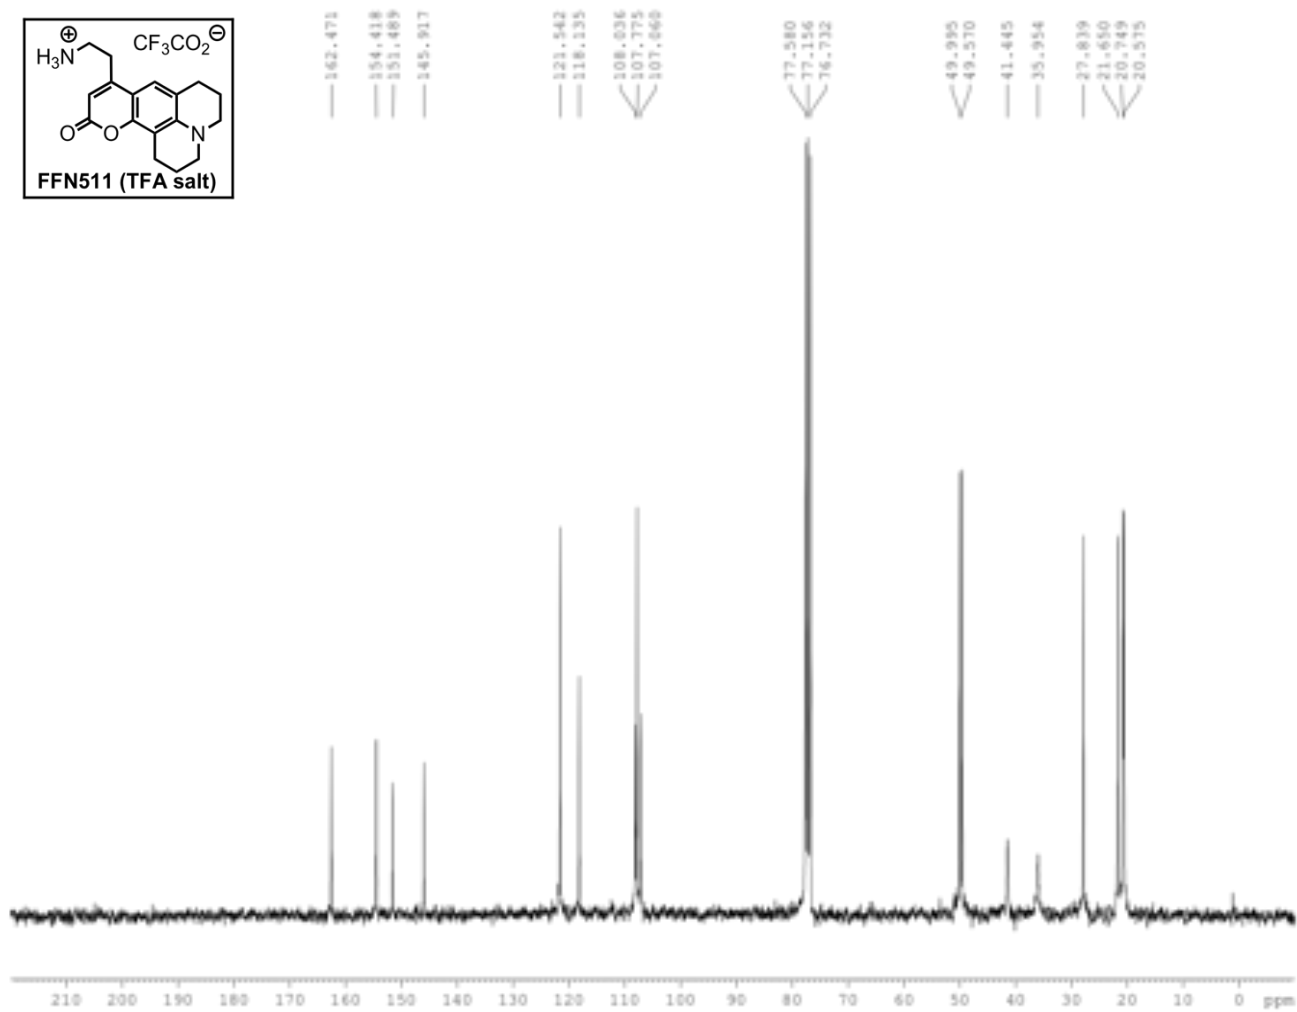



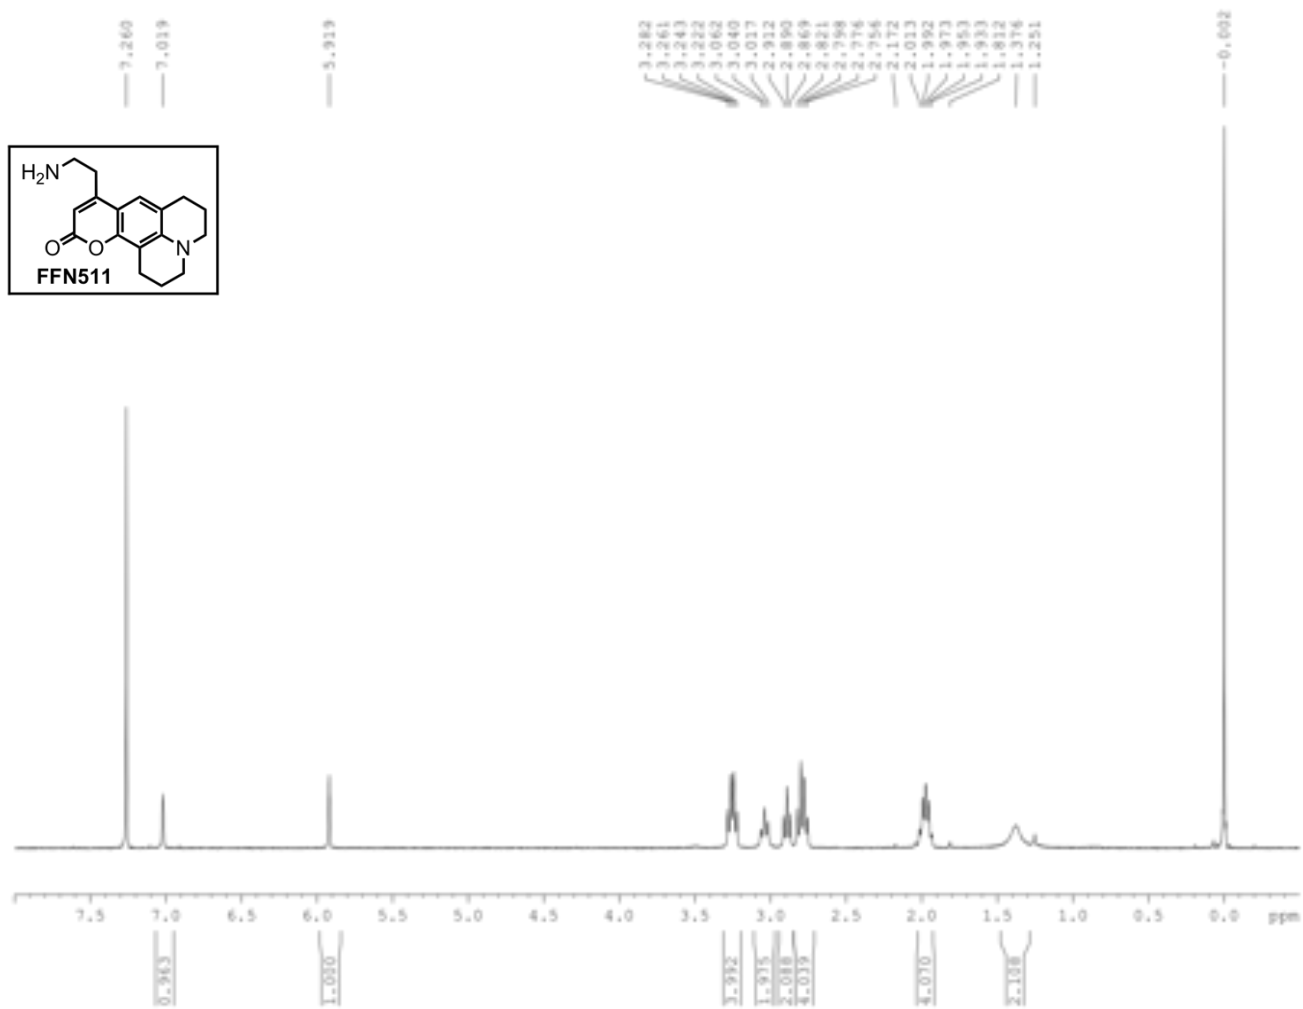

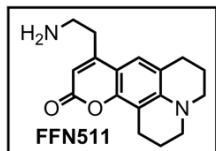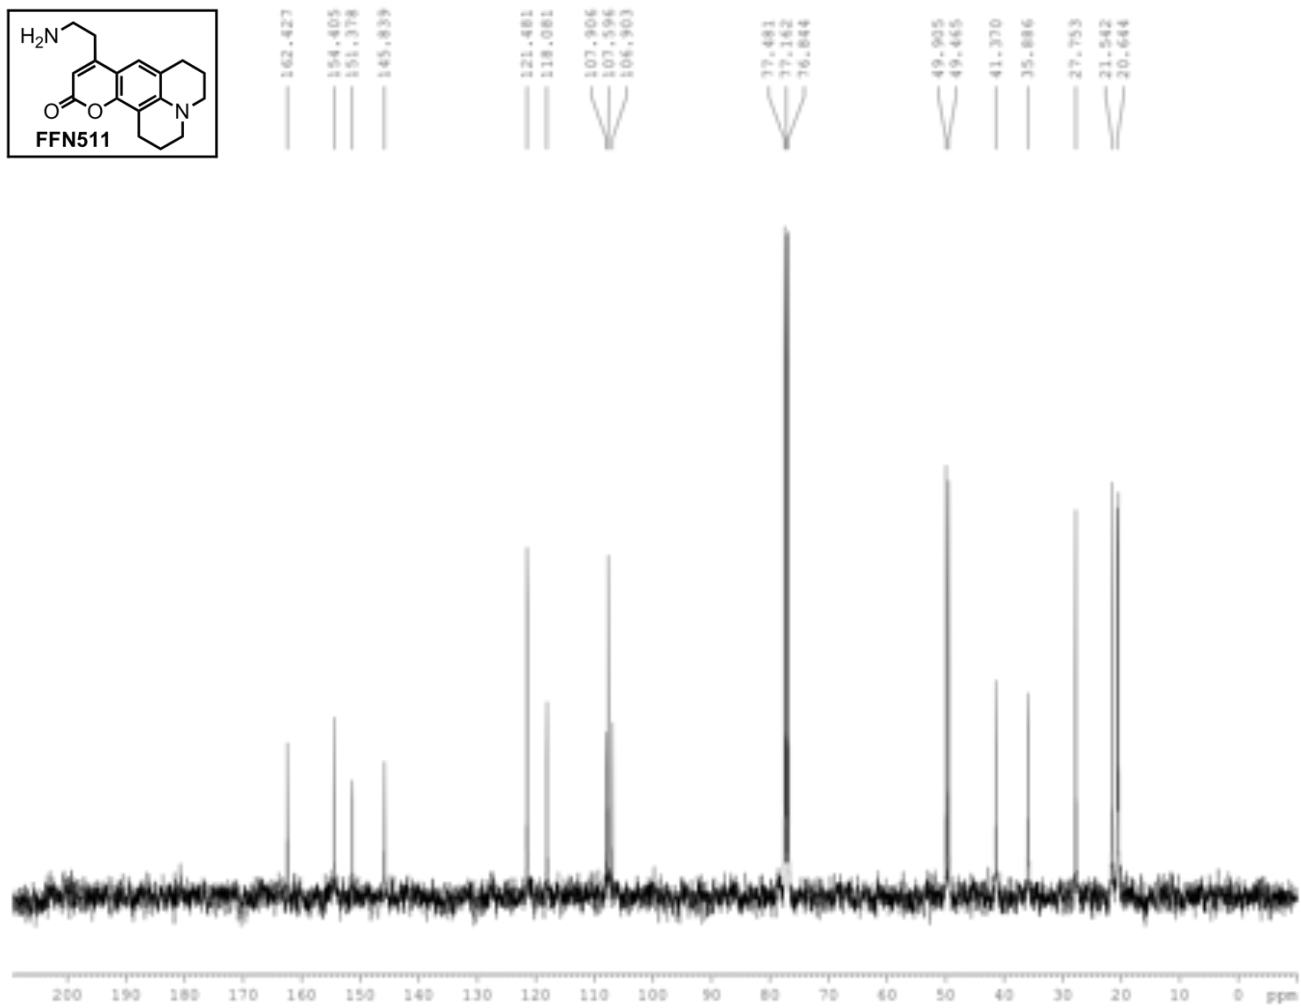

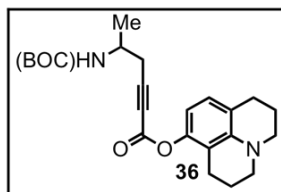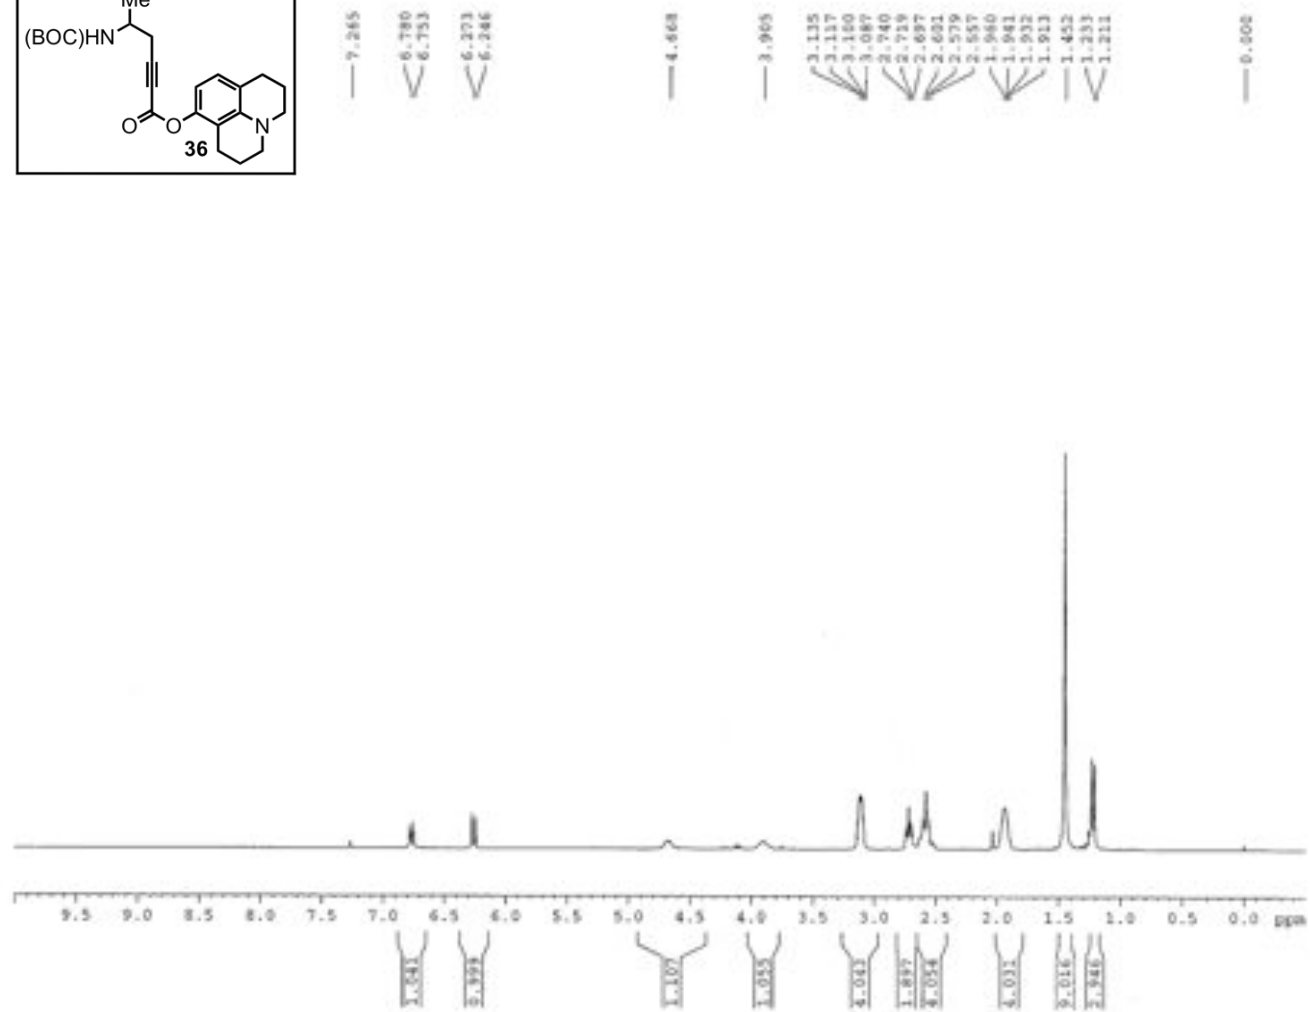

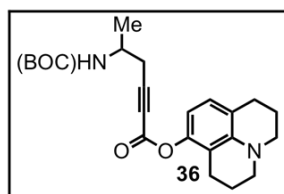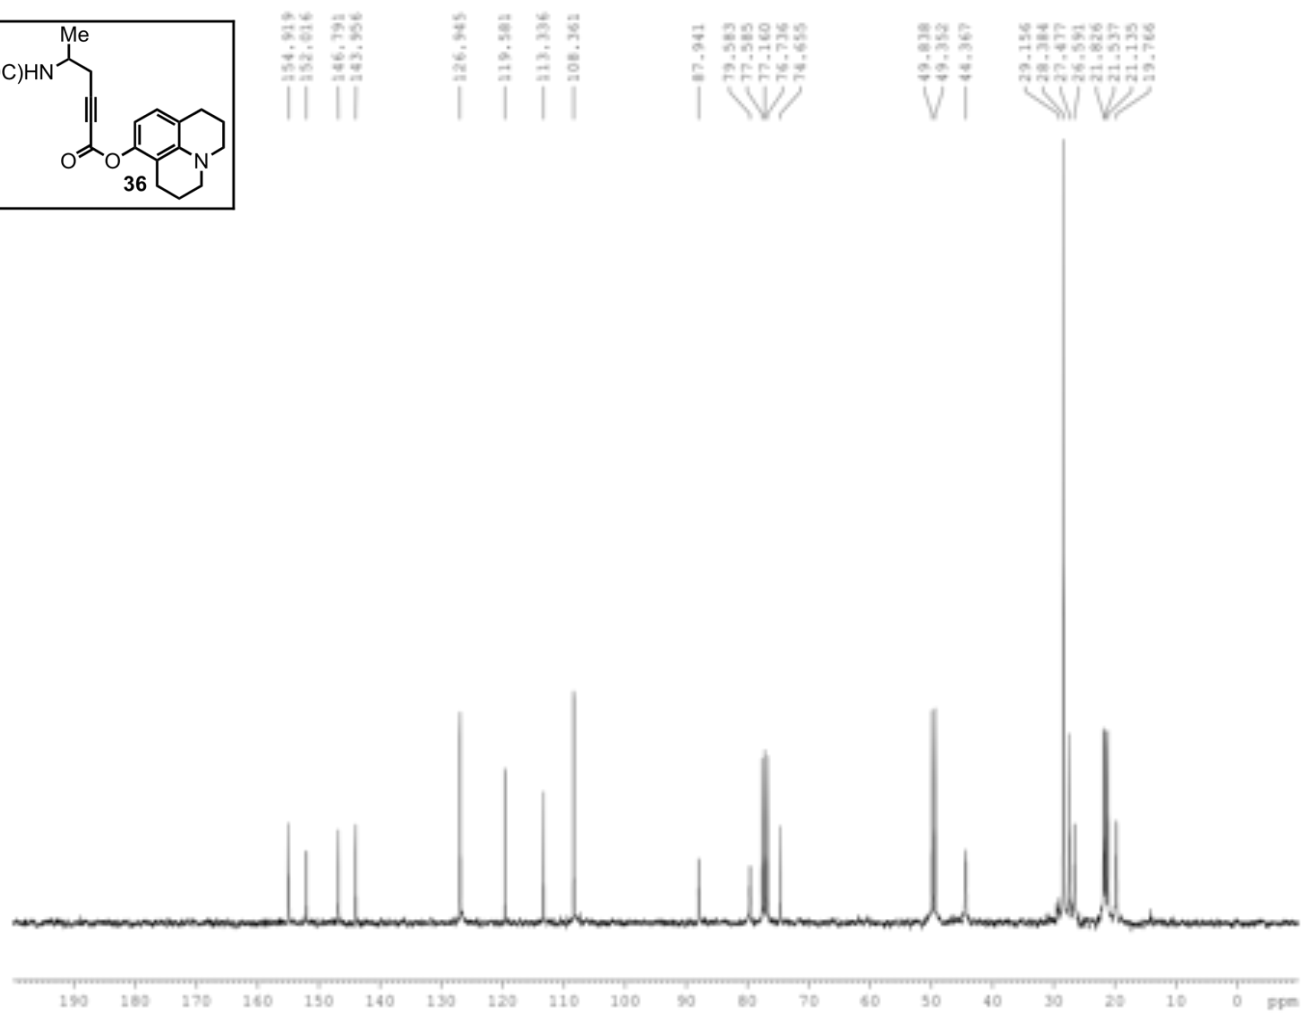

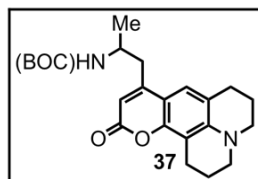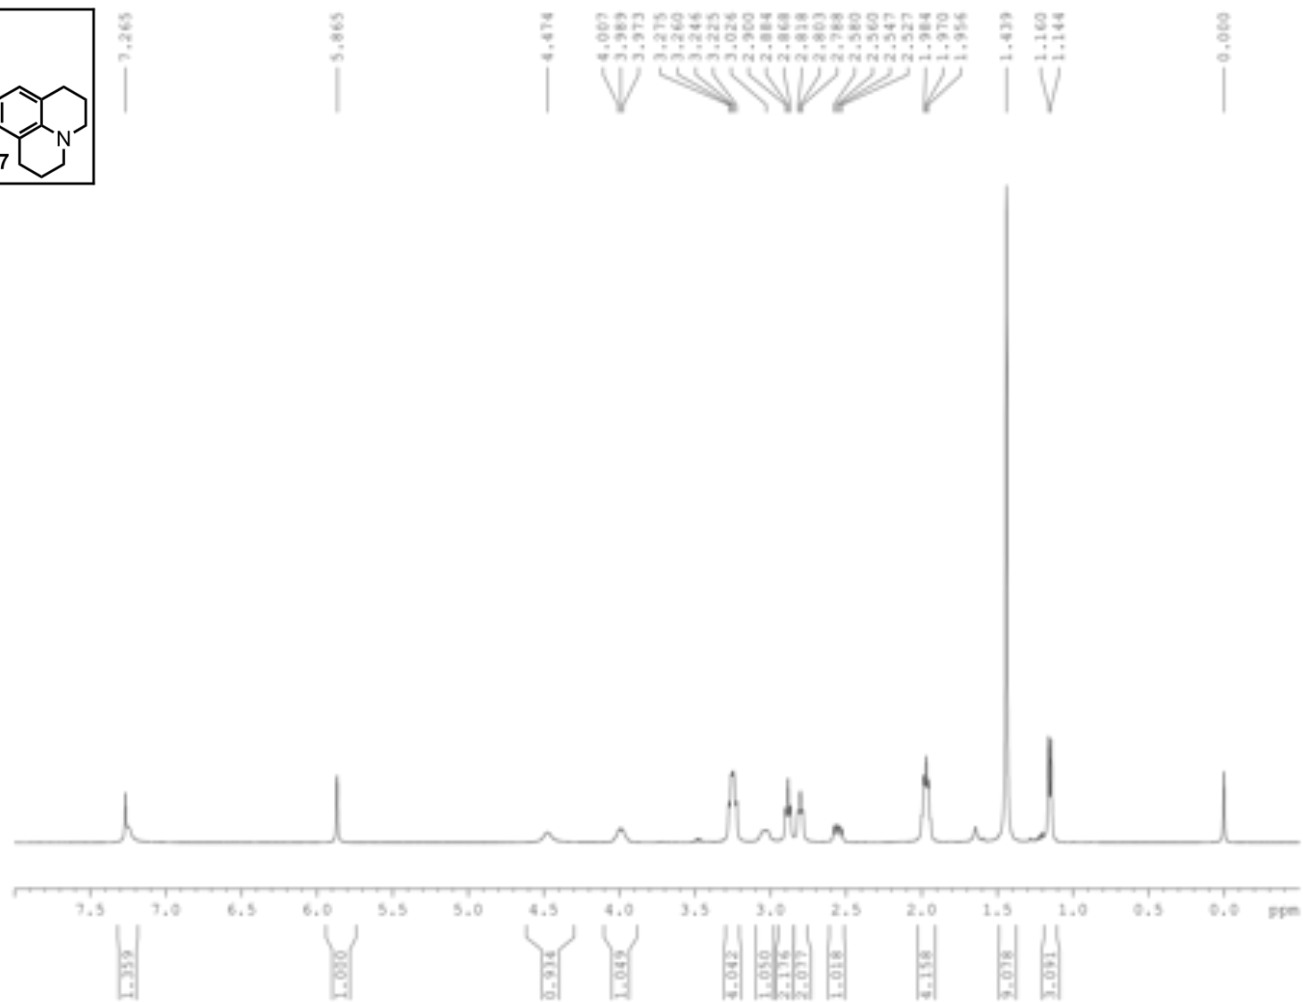

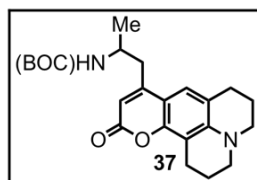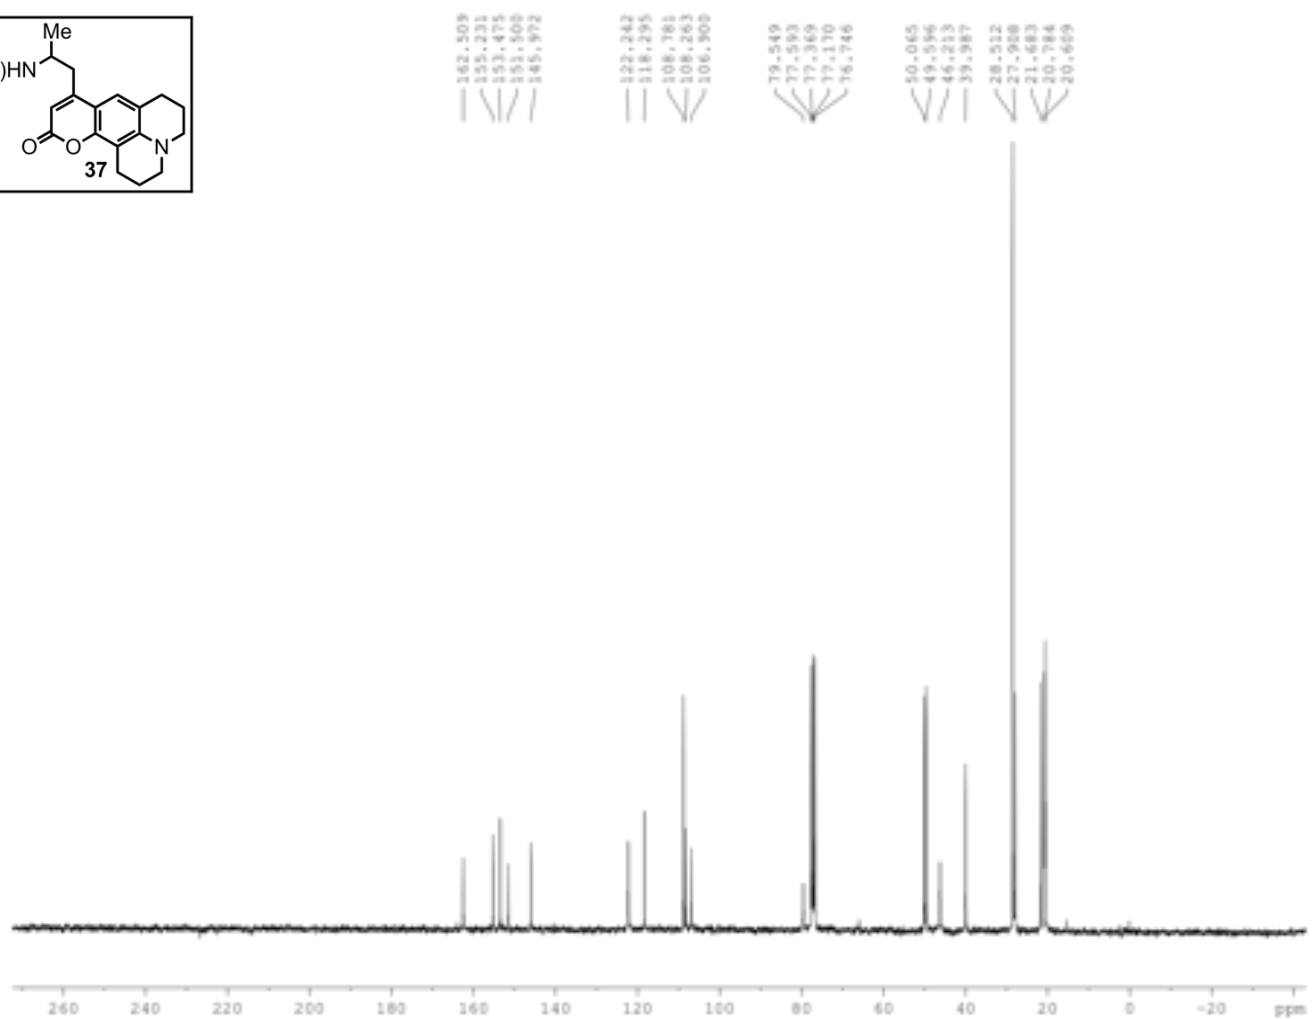

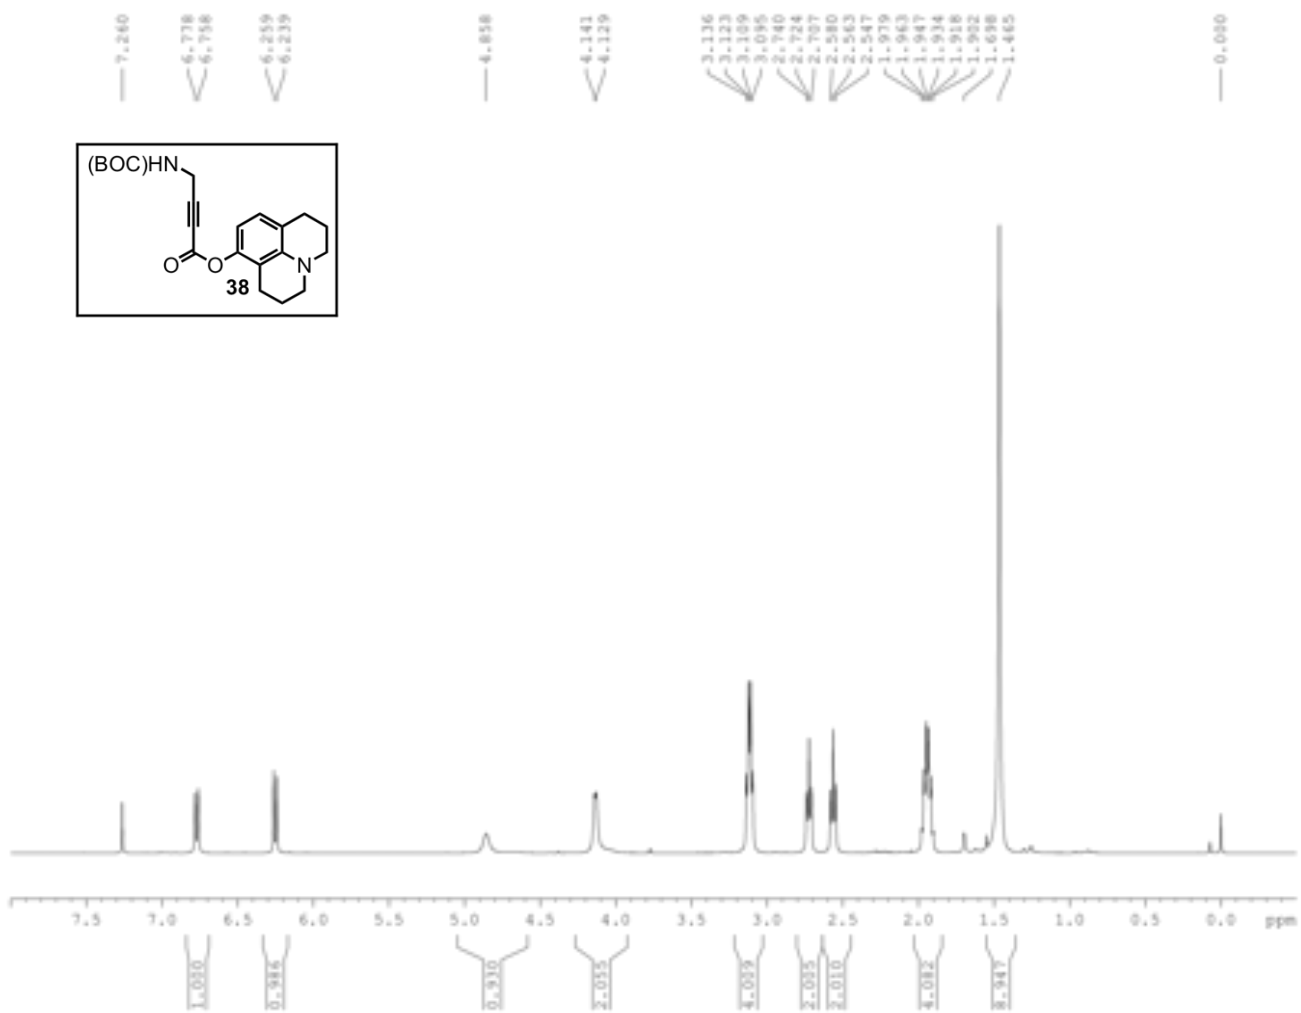

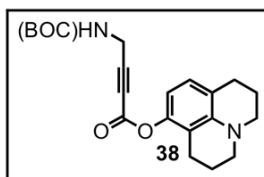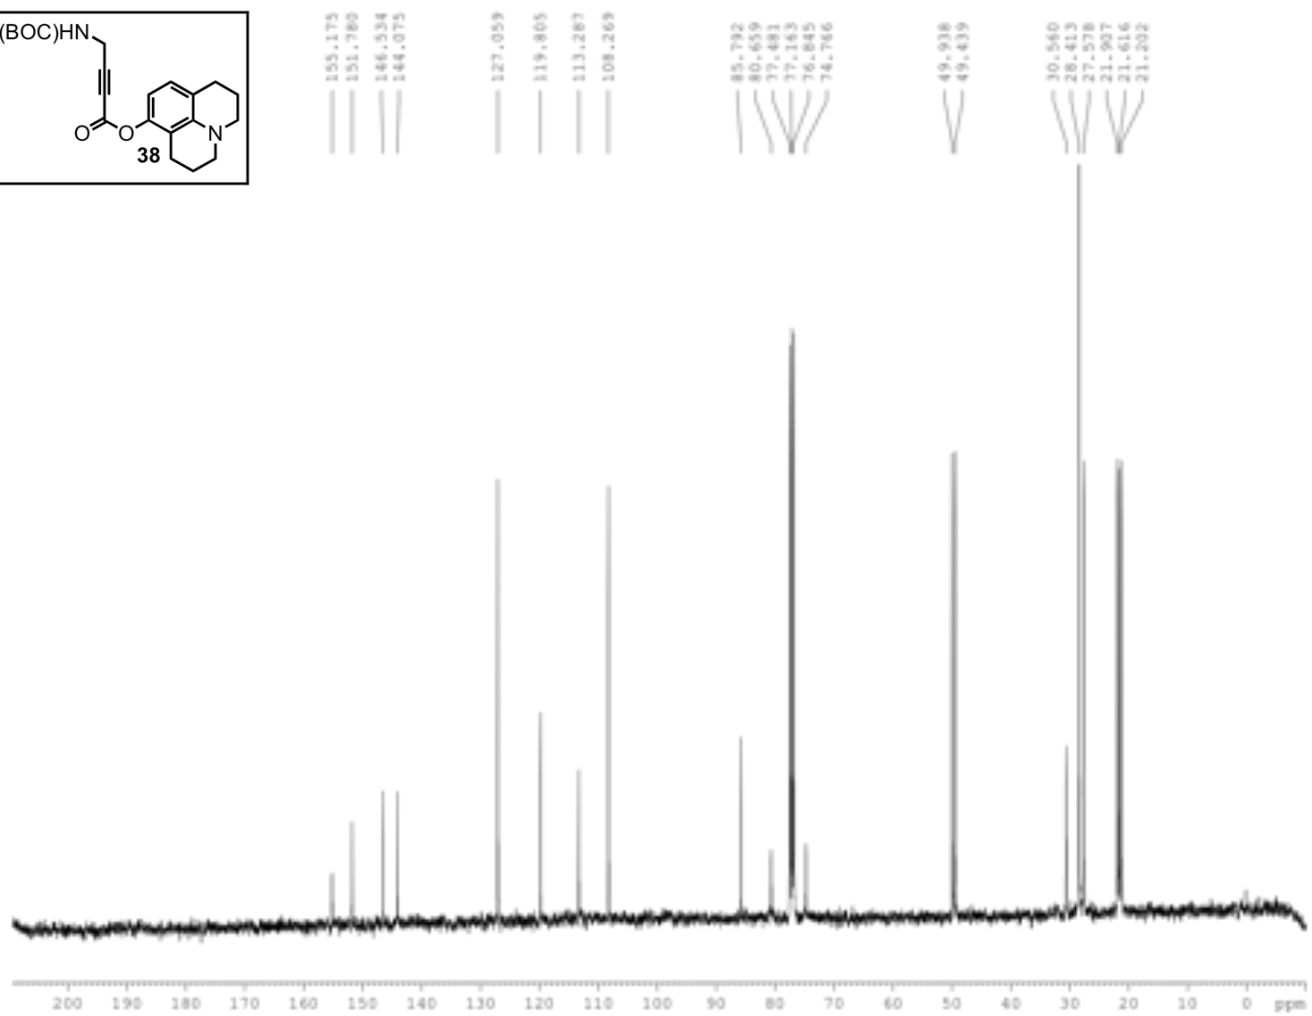



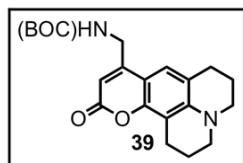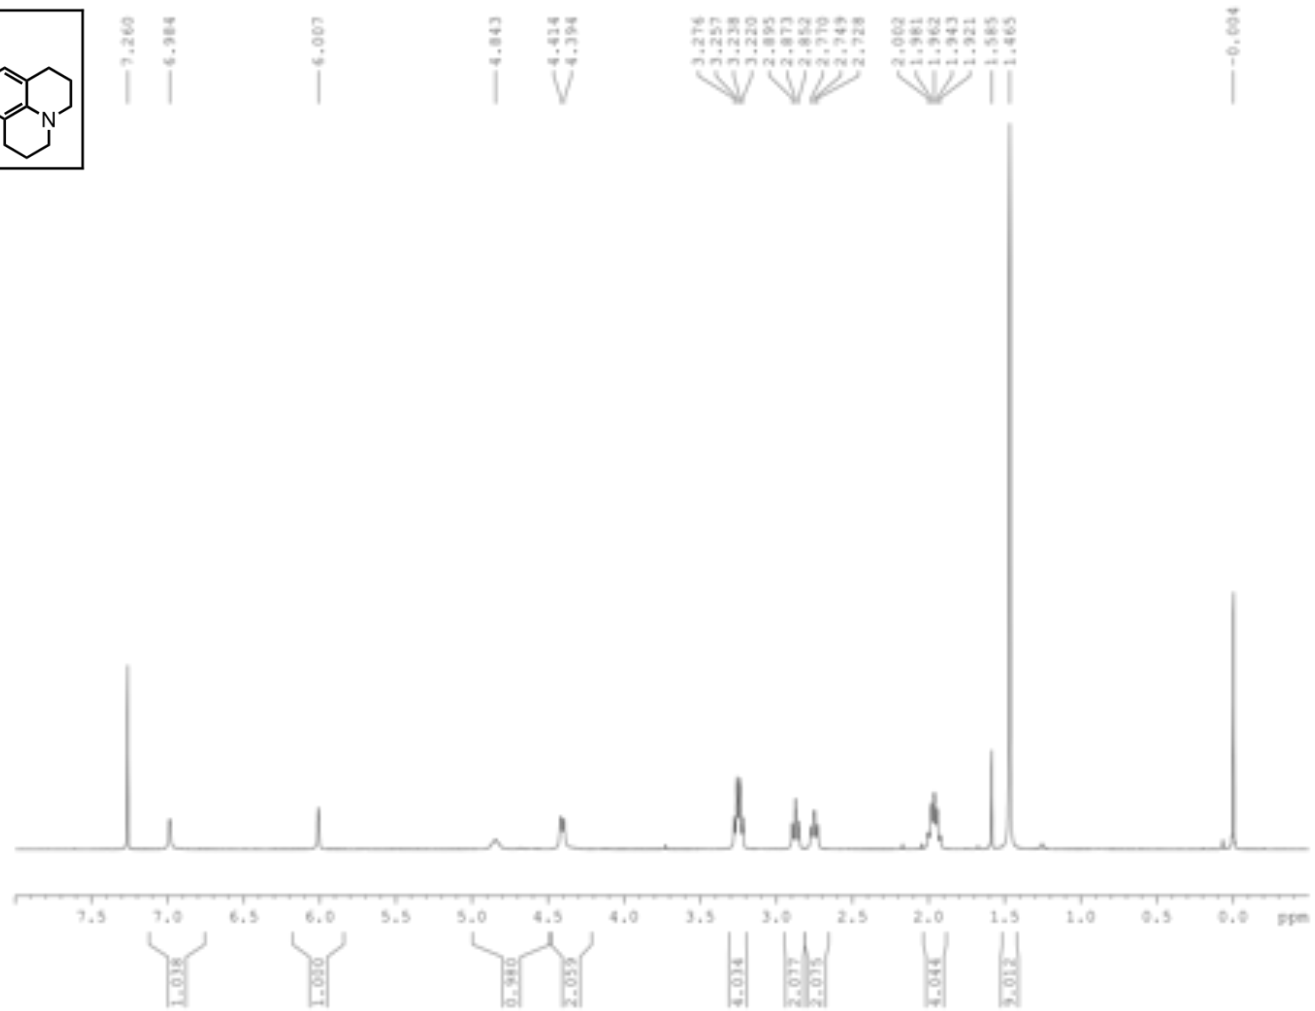

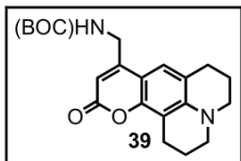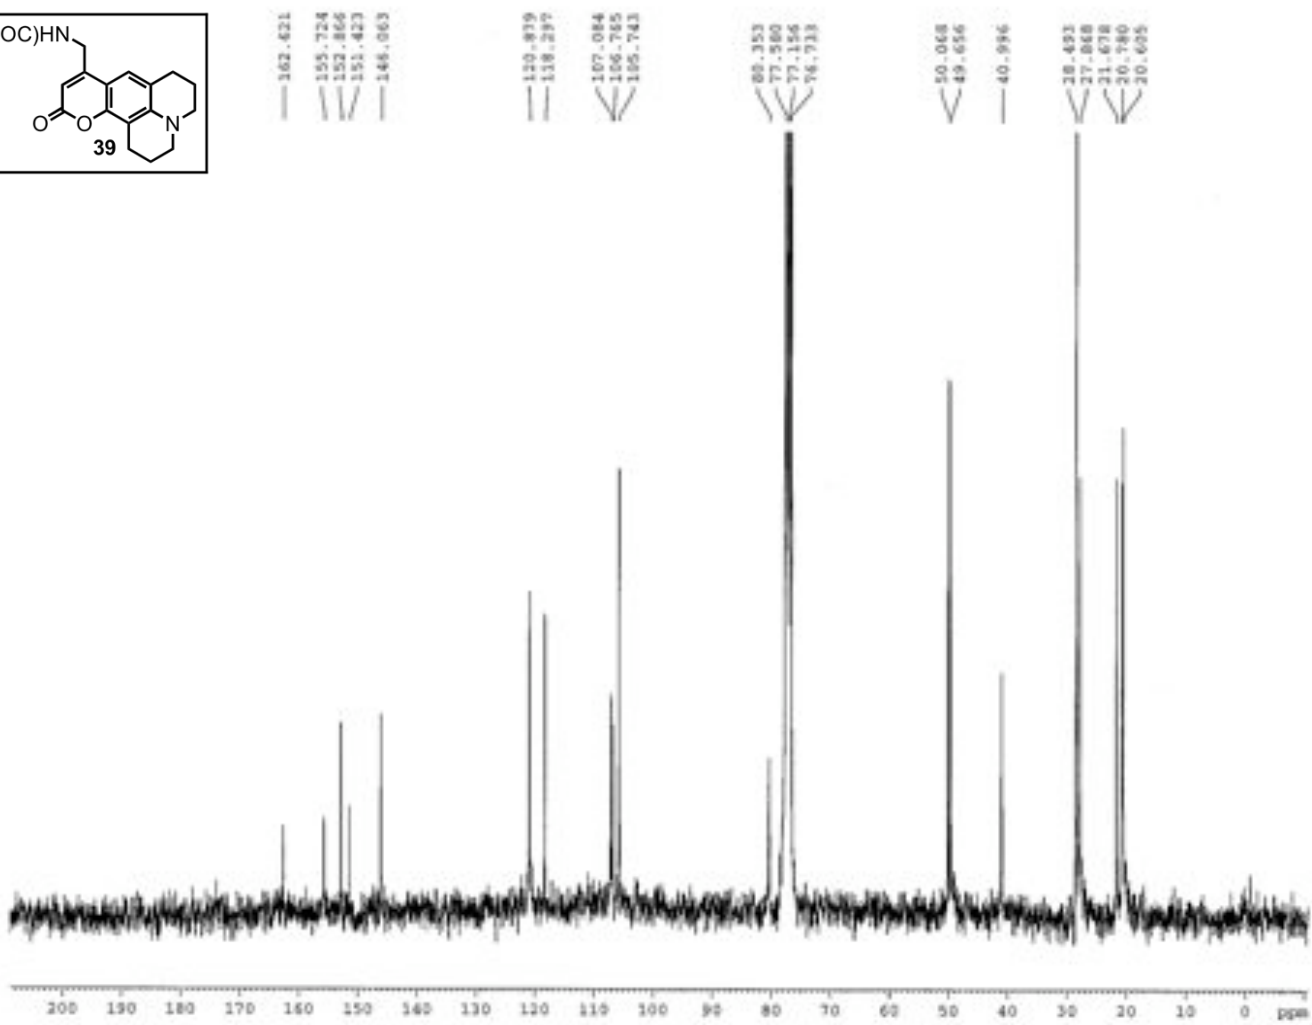

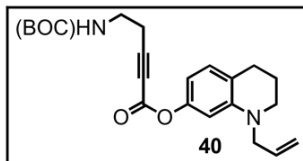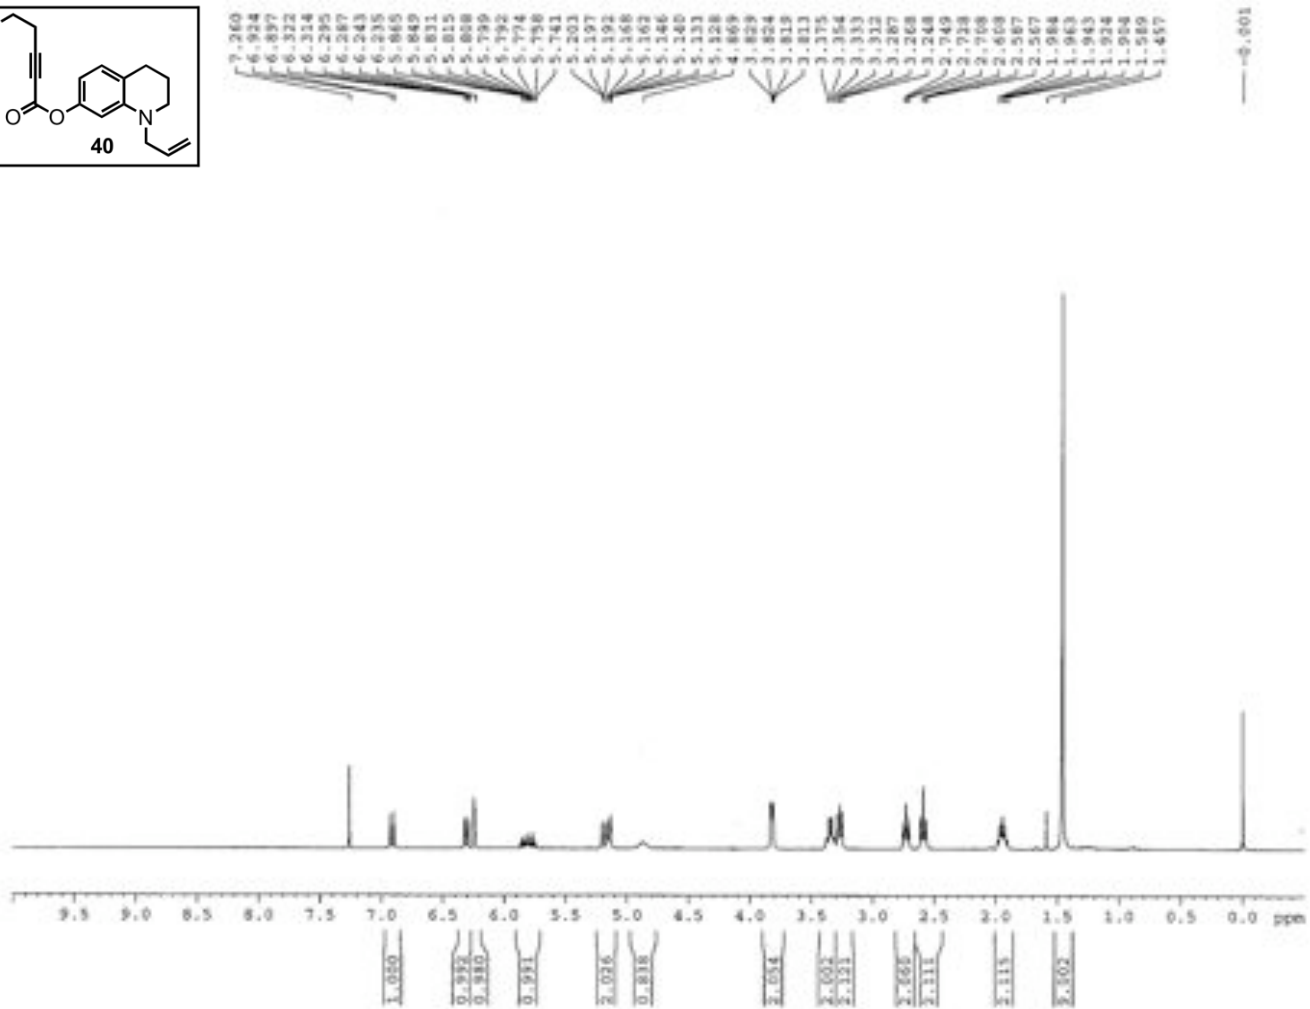

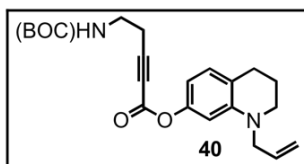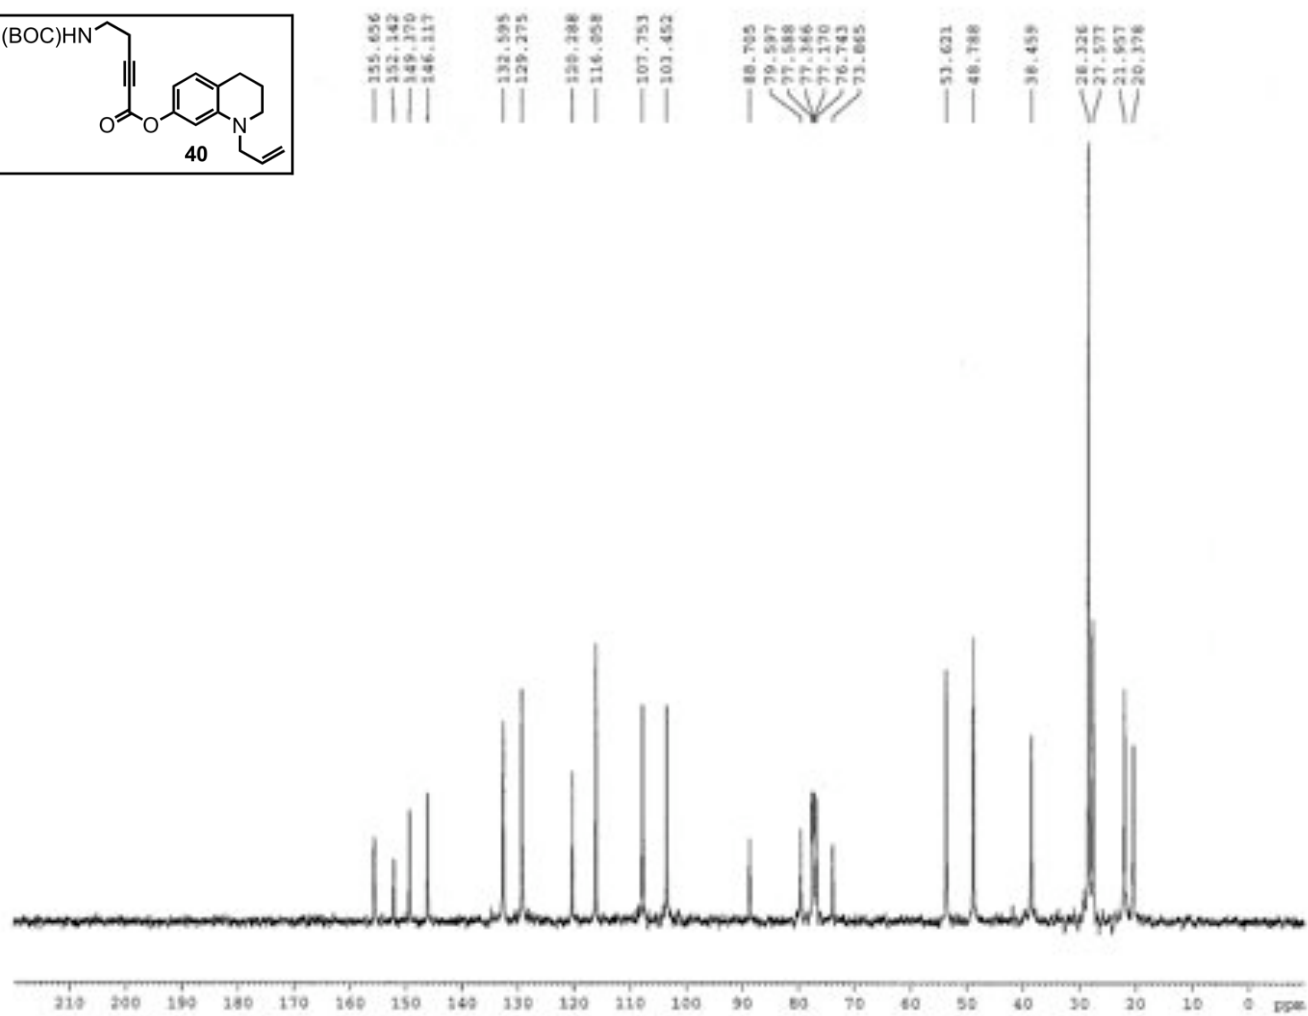

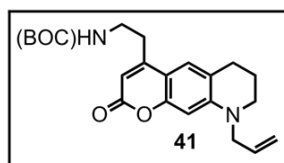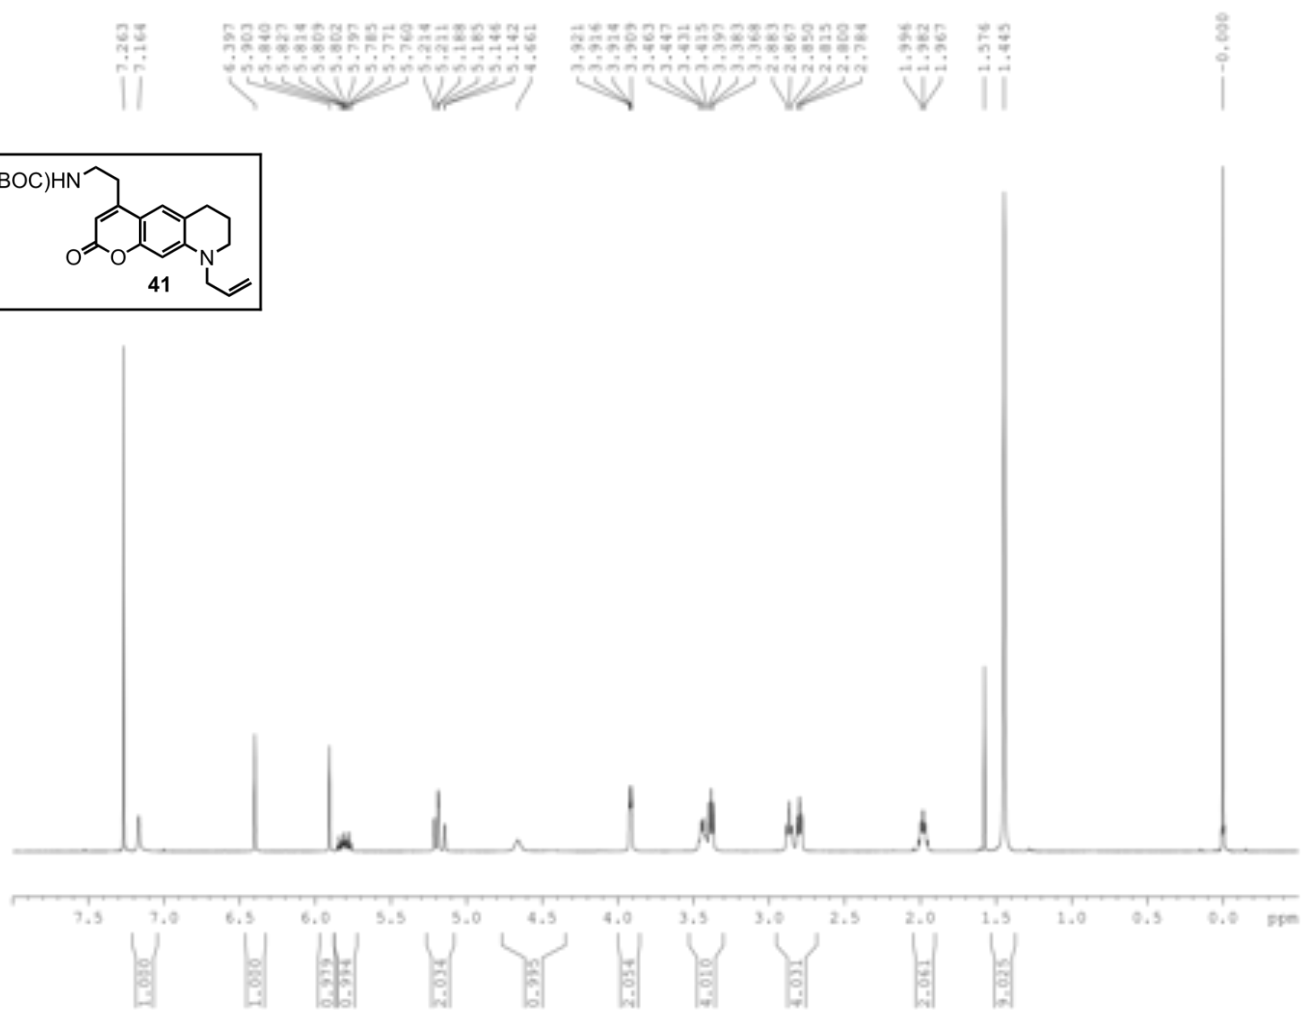

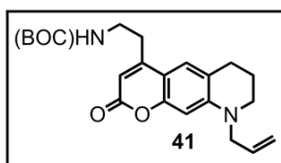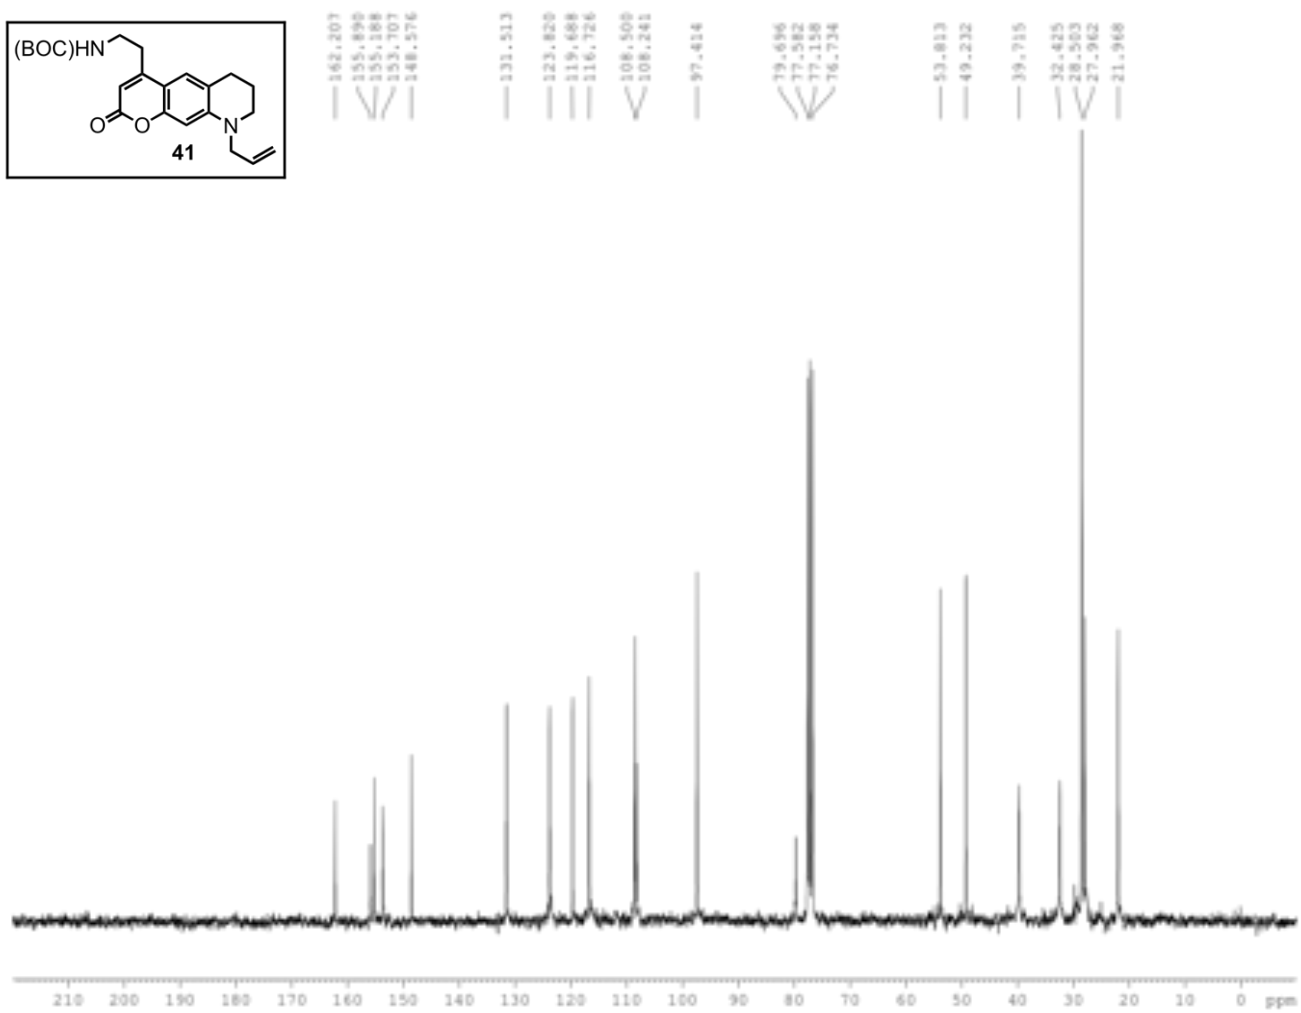

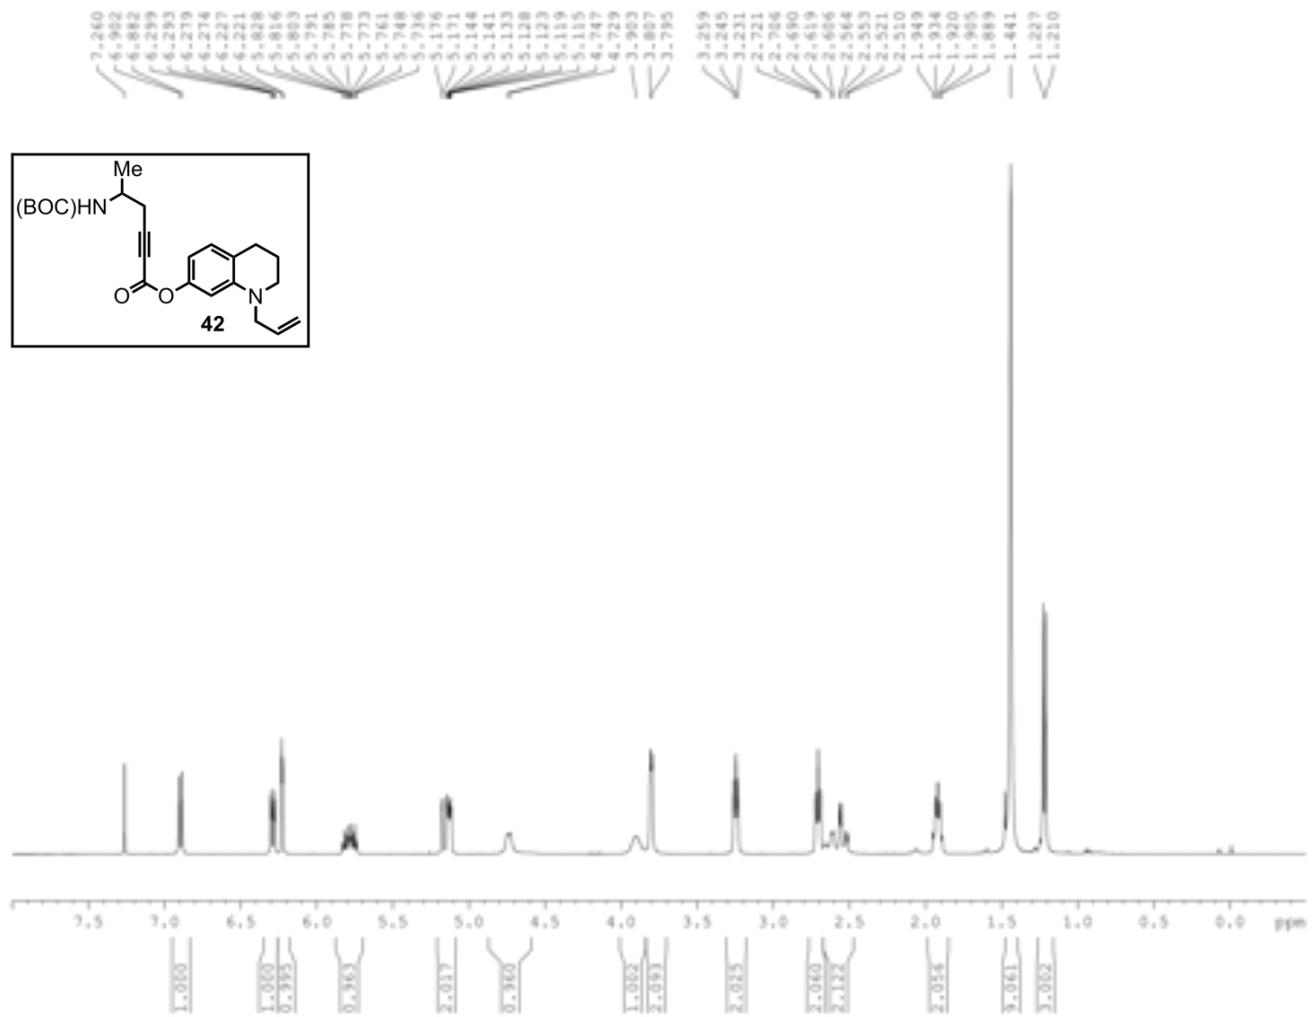

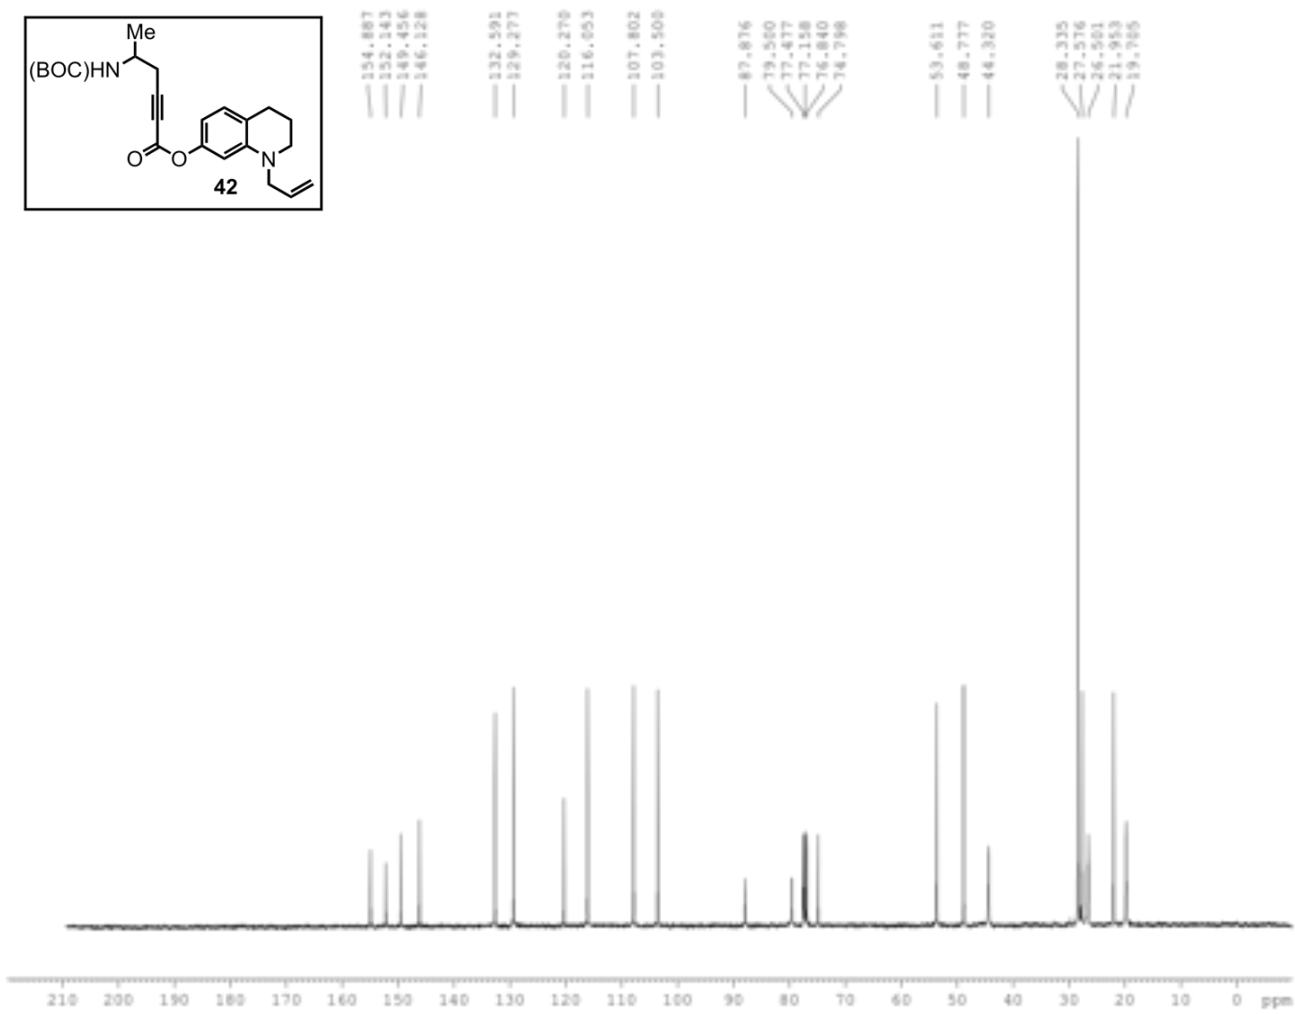



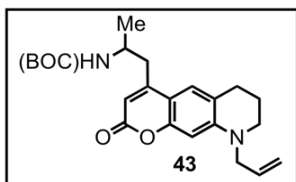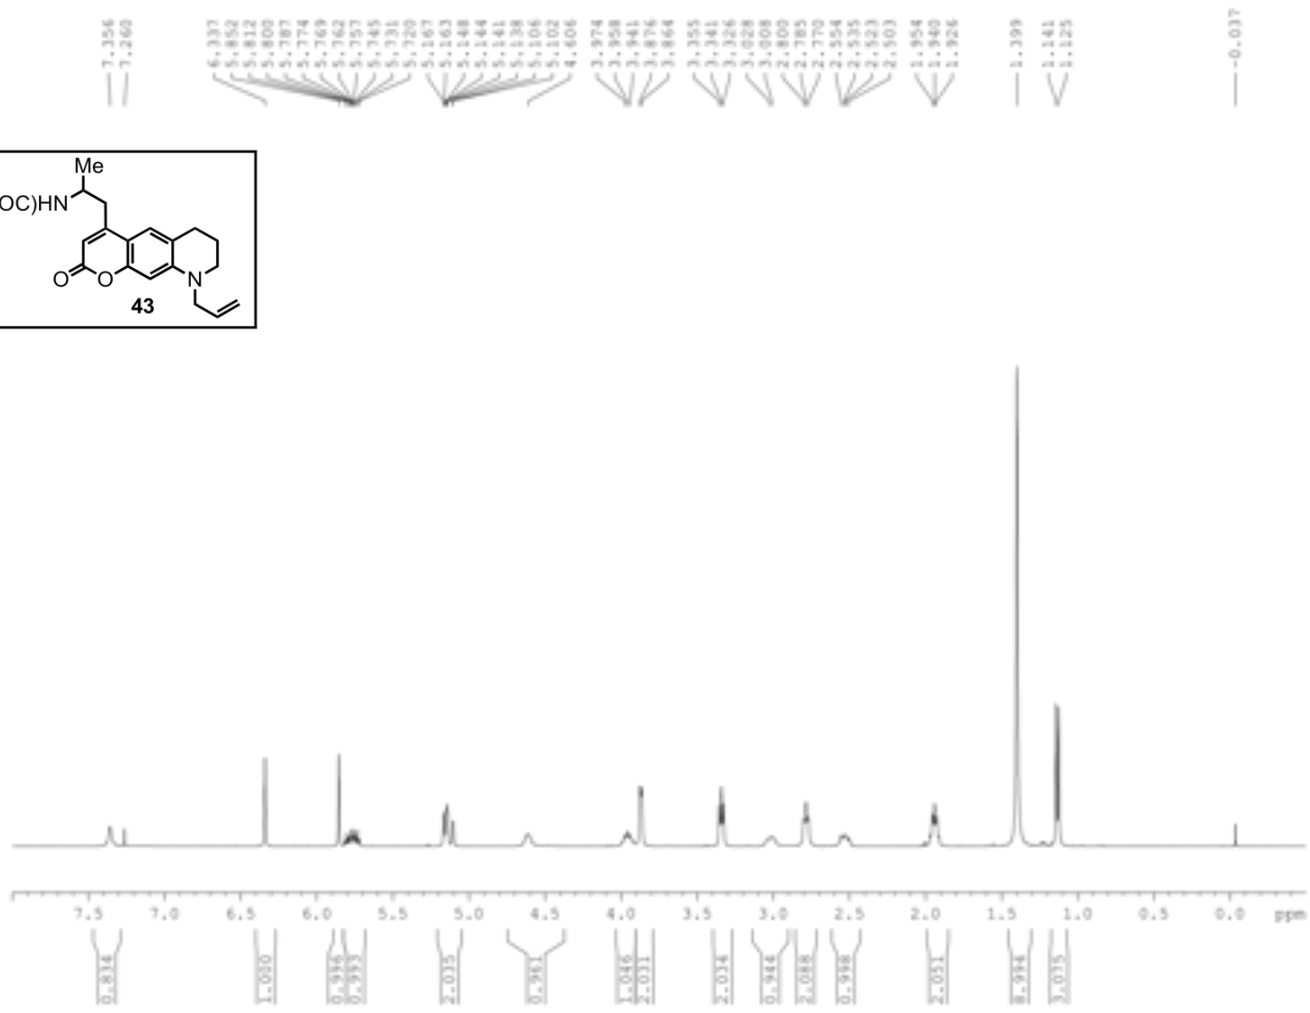

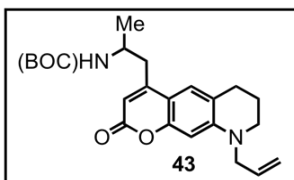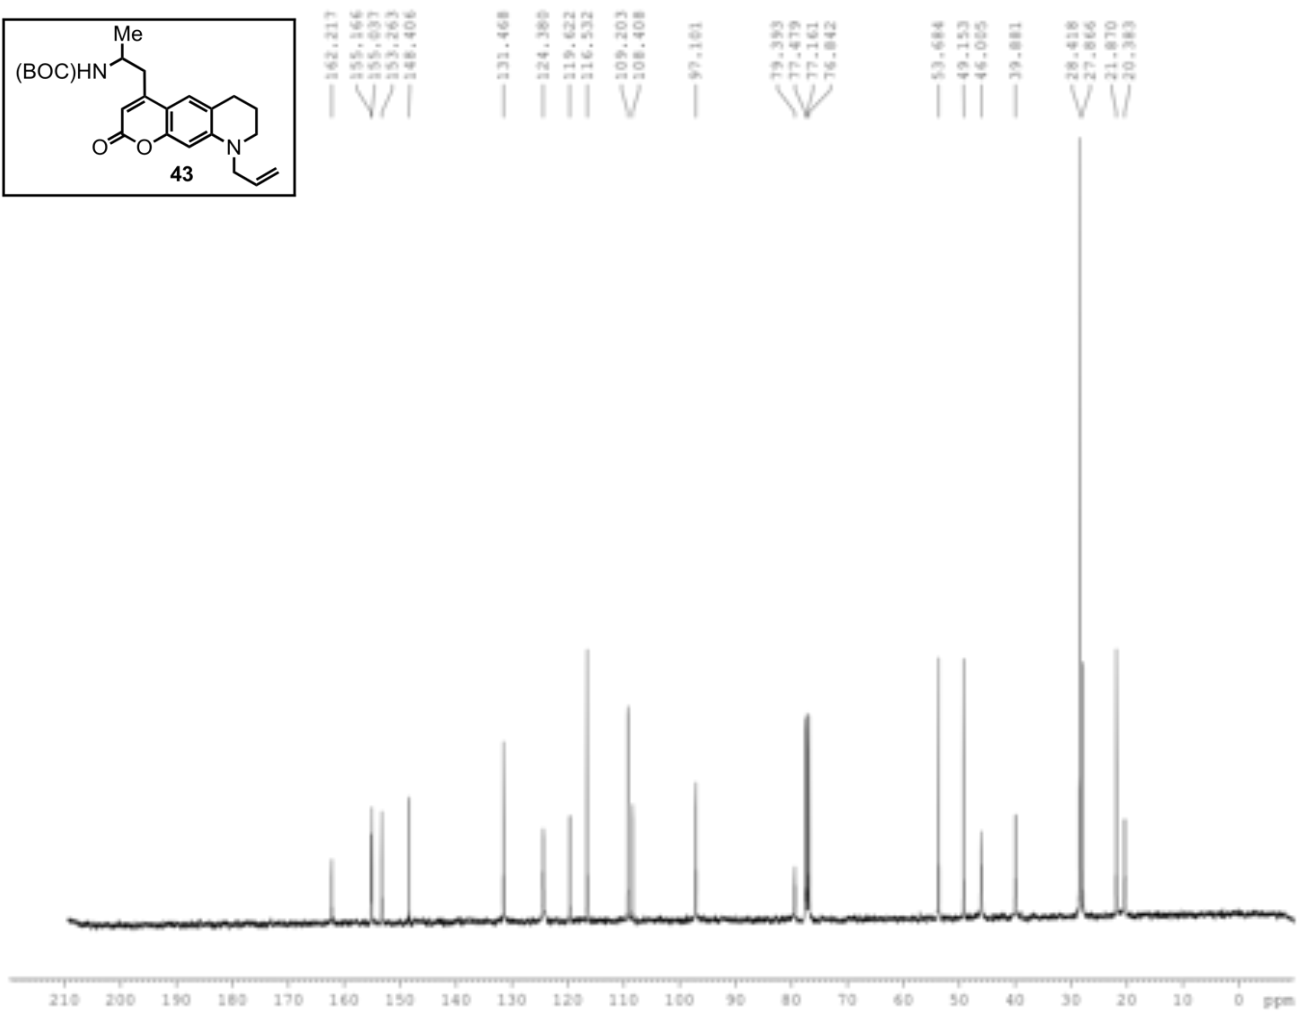

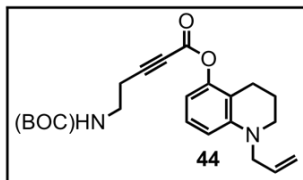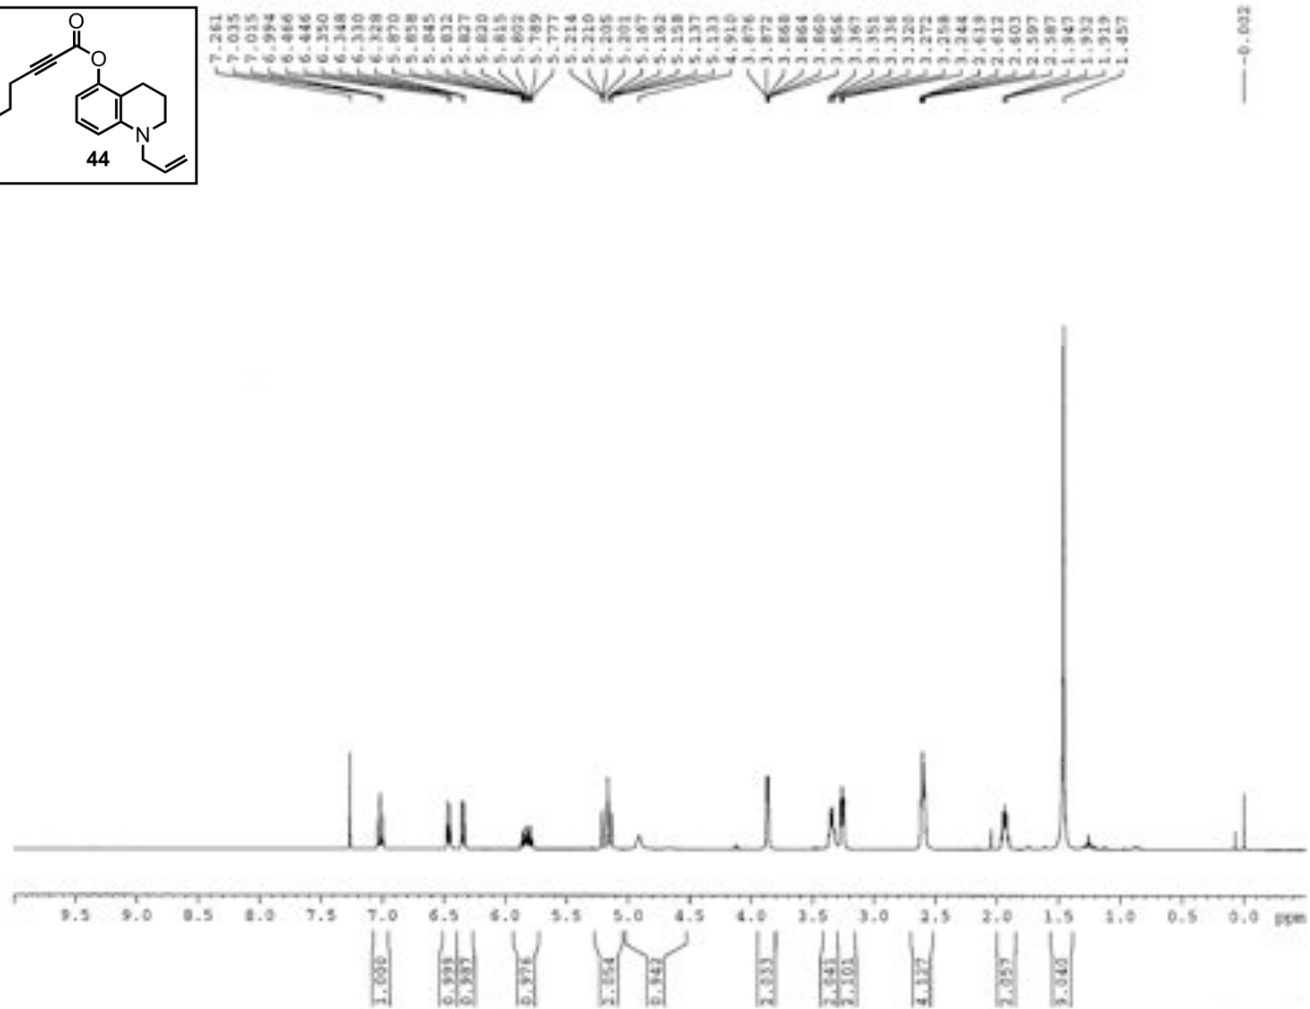

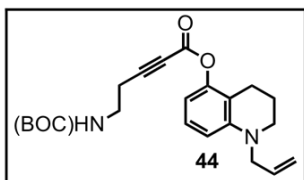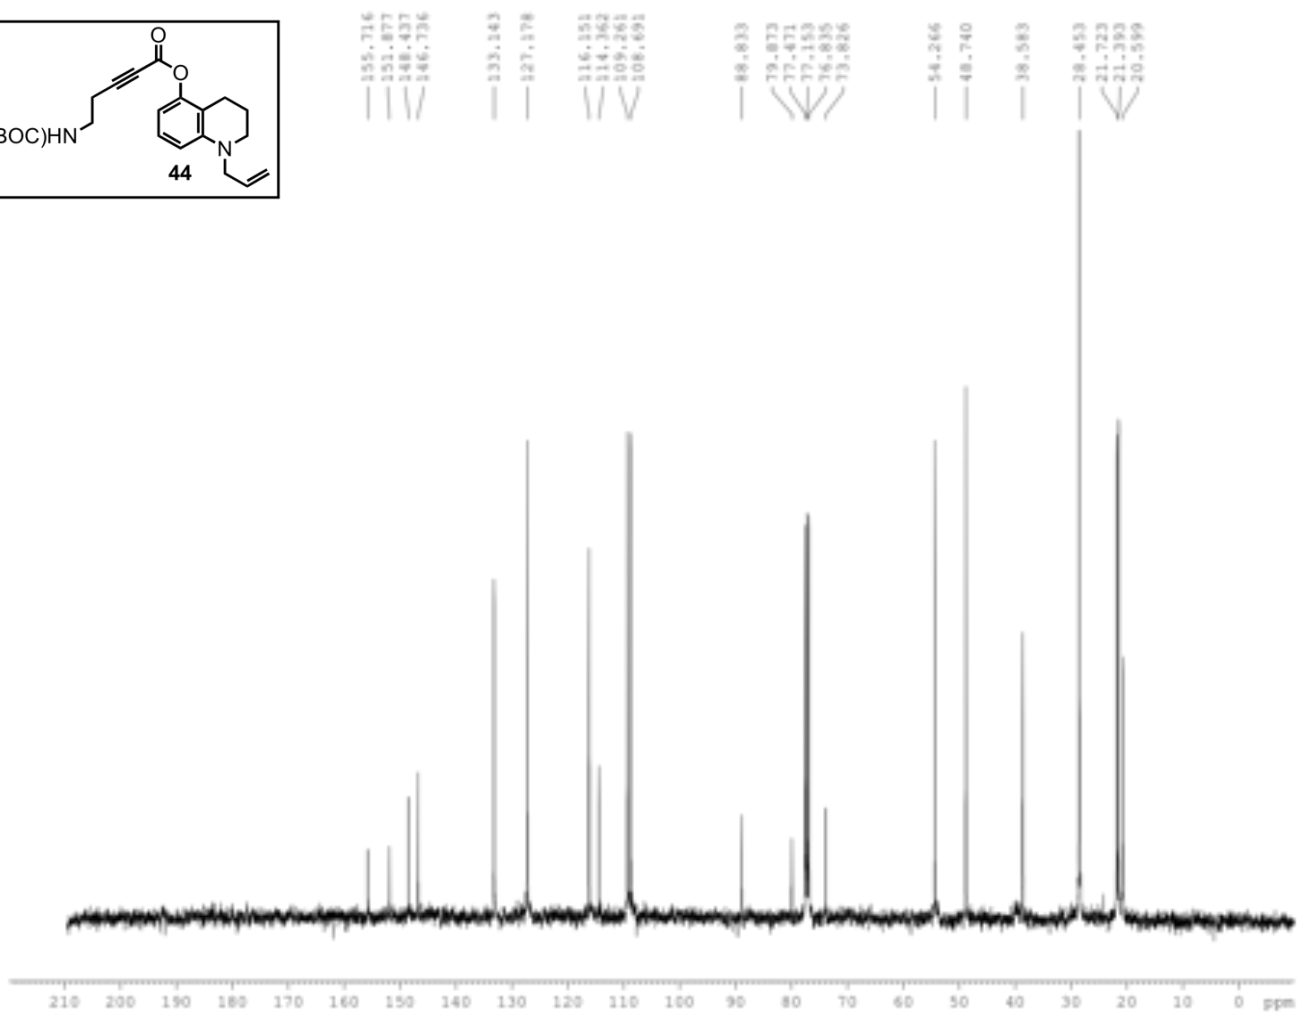

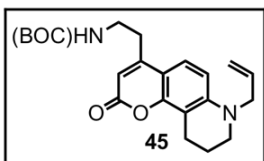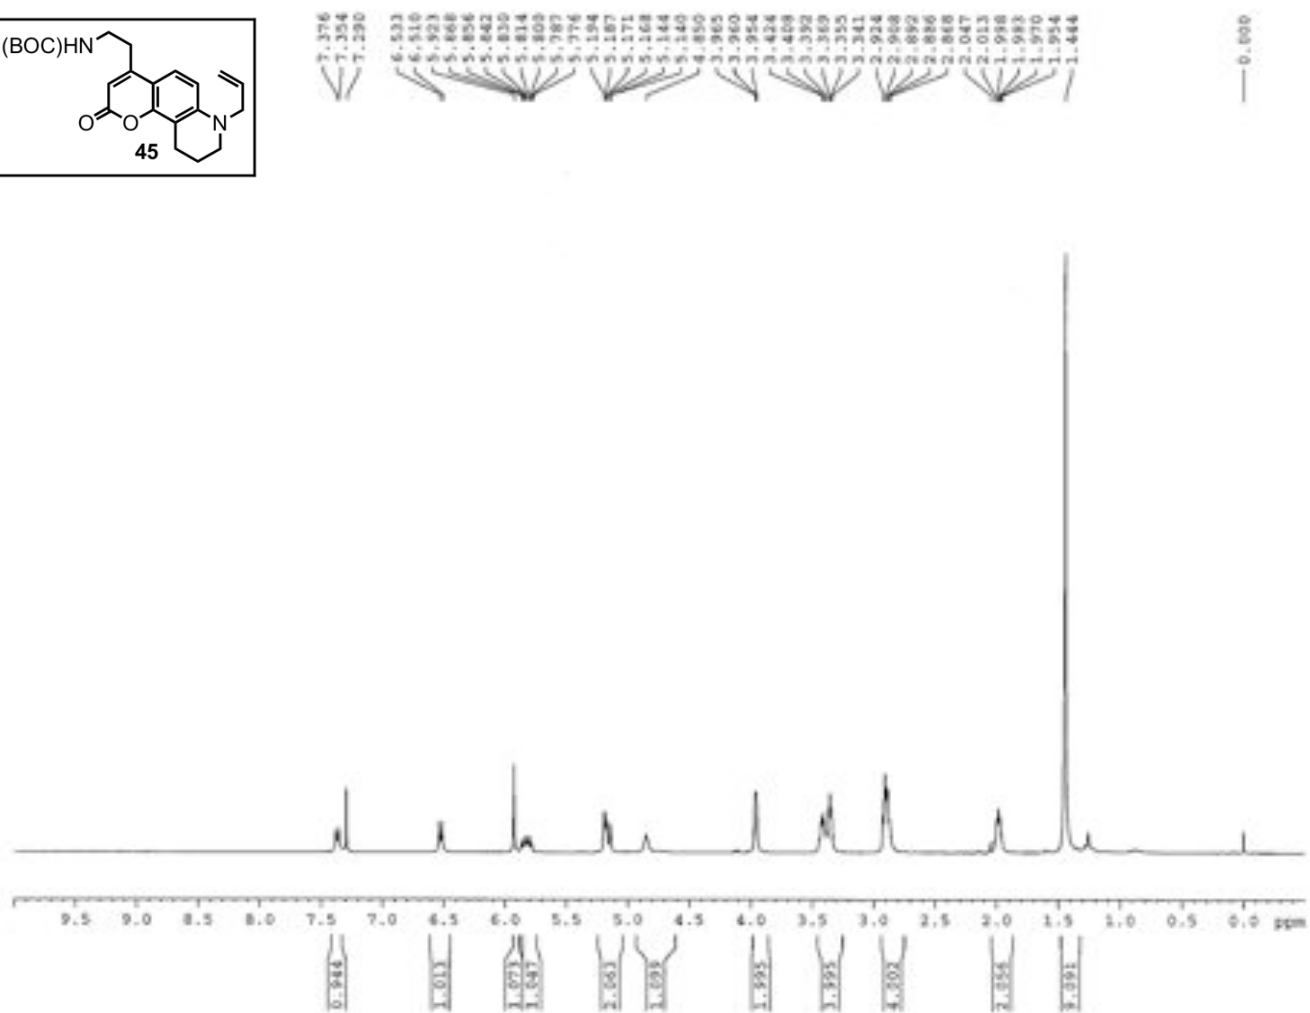

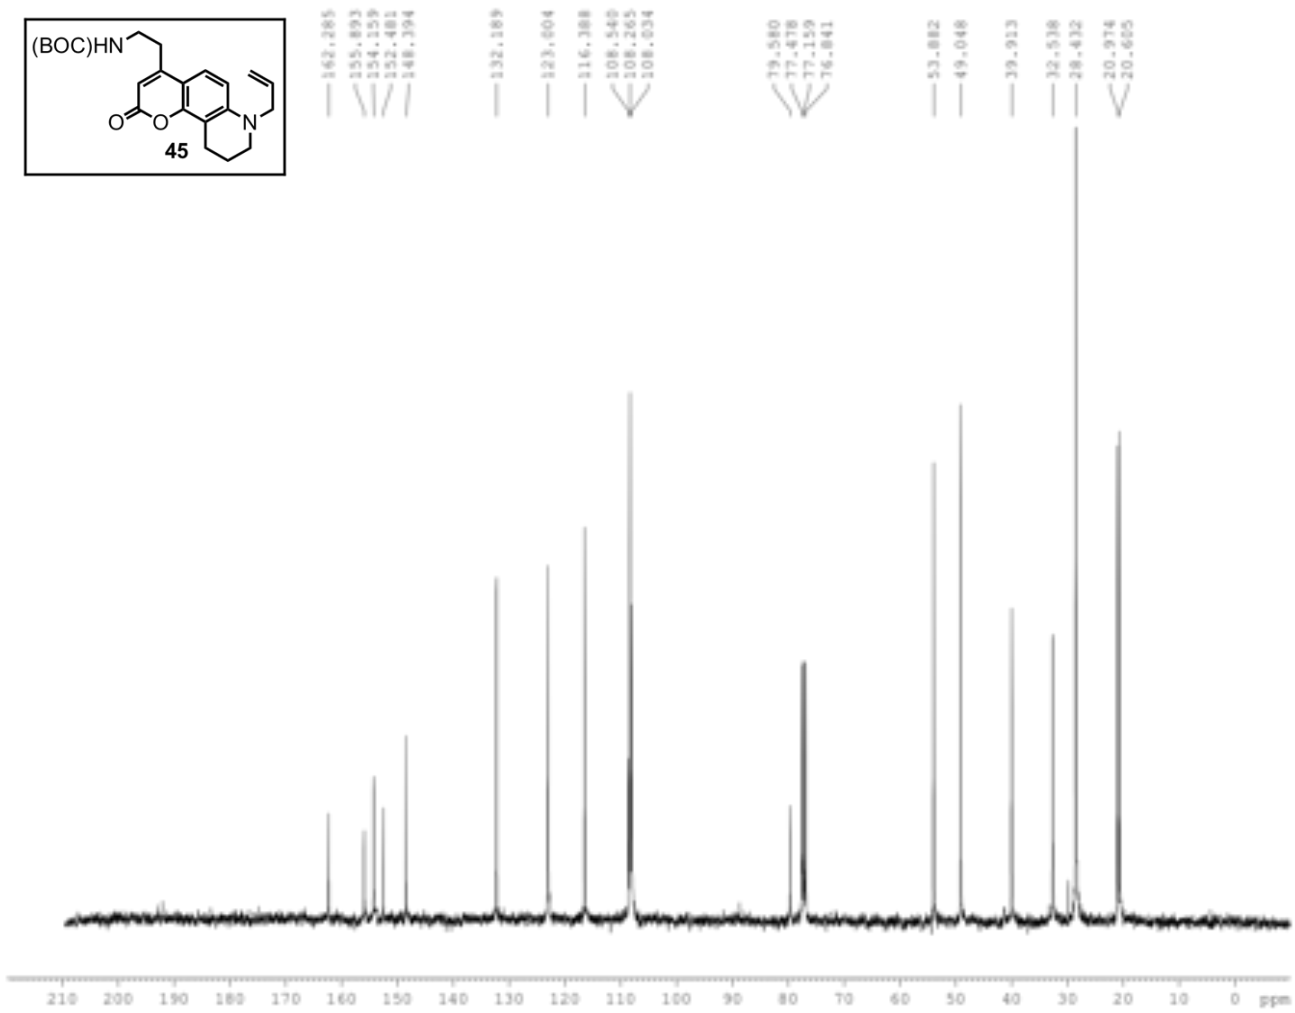



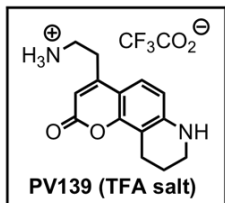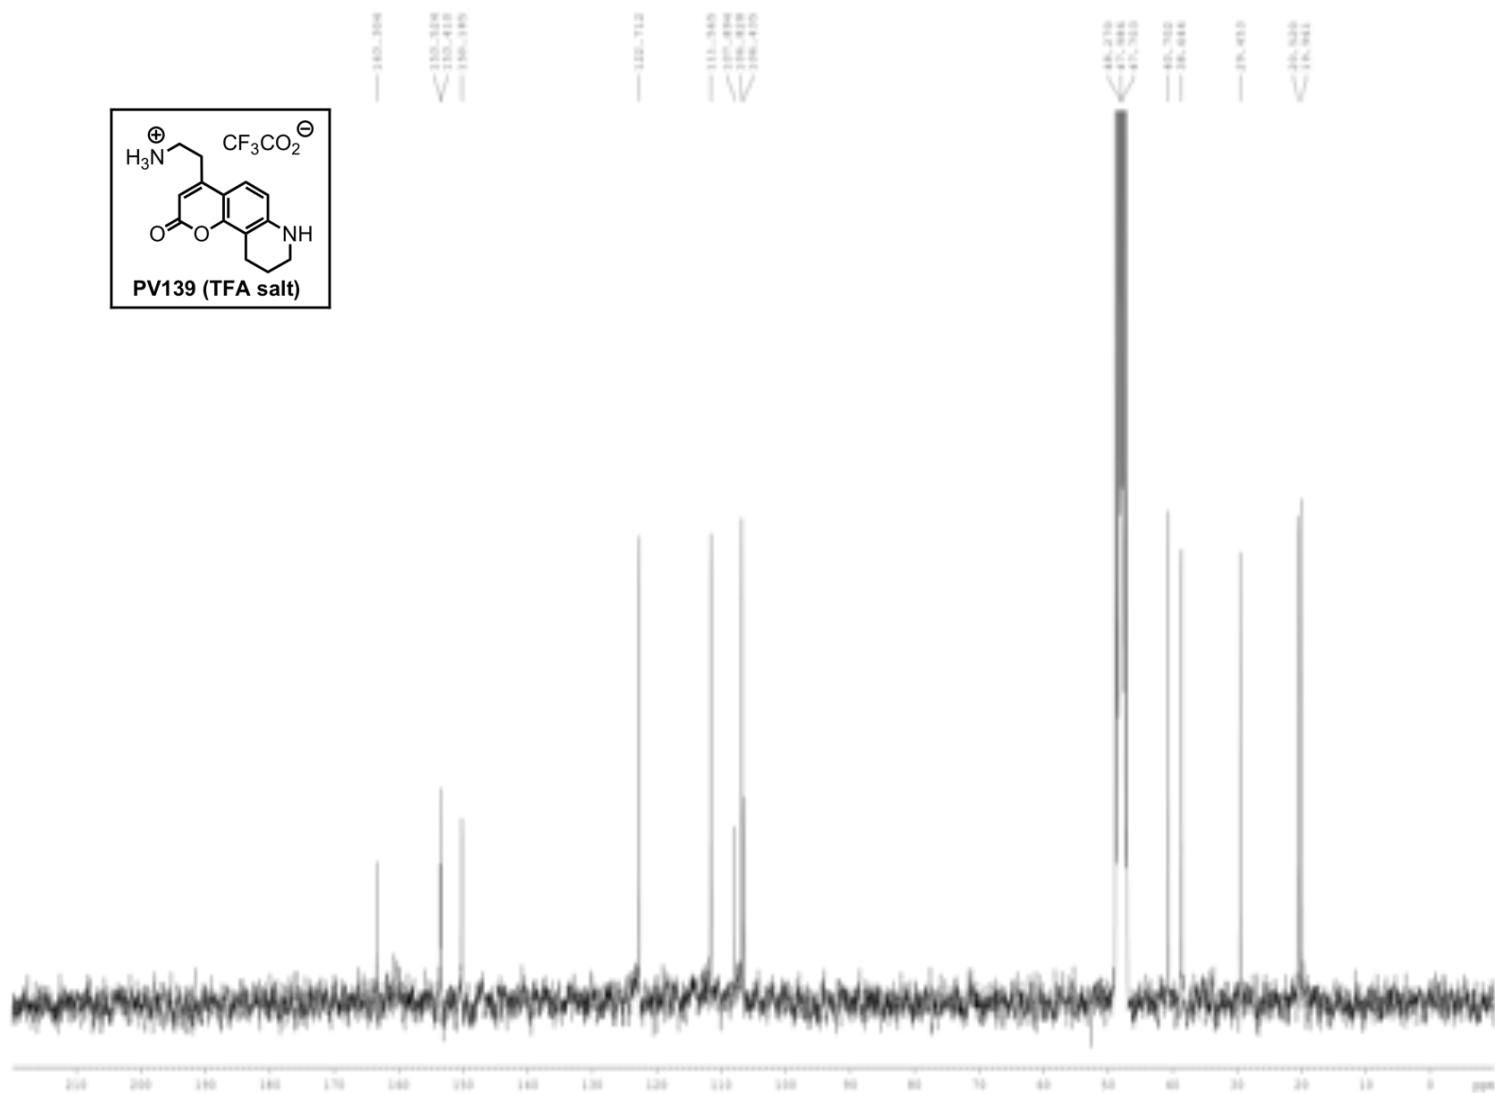

Supplement: NIHMS392348-supplement-2_si_002.pdf [file NIHMS392348-supplement-2_si_002.pdf]
