# Supplementary material
Source: PubMed Central journal article supplement (PMC3448786)
Supplement: NIHMS392348-supplement-1_si_001.pdf [file NIHMS392348-supplement-1_si_001.pdf]

# Catalytic Coupling of Arene C-H Bonds and Alkynes for the Synthesis of Coumarins: the Substrate Scope and Application to the Development of Neuroimaging Agents

Paul A. Vadola and Dalibor Sames\*

*Department of Chemistry, Columbia University,  
3000 Broadway, New York, New York, 10027*

## Supporting Information

### Table of Contents:

|                                   |       |   |
|-----------------------------------|-------|---|
| Acid Screen Results               | ..... | 2 |
| X-ray data for compound <b>14</b> | ..... | 4 |
| ORTEP for compound <b>14</b>      | ..... | 5 |
| ORTEP for compound <b>14</b>      | ..... | 6 |

## Acid Screen Results:

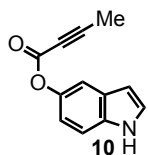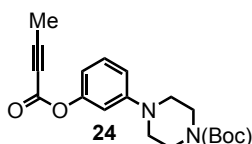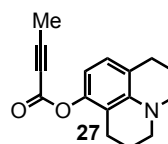

| entry | substrate | acid              | temp. | observations                                                       |
|-------|-----------|-------------------|-------|--------------------------------------------------------------------|
| 1     | 10        | HCl               | rt    | no reaction, starting material re-isolated                         |
| 2     | 10        | HCl               | 80 °C | decomposition                                                      |
| 3     | 10        | HSbF <sub>6</sub> | rt    | decomposition                                                      |
| 4     | 10        | HSbF <sub>6</sub> | 80 °C | decomposition                                                      |
| 5     | 10        | TfOH              | rt    | complex mixture by <sup>1</sup> H NMR; no product detected         |
| 6     | 10        | TfOH              | 80 °C | decomposition                                                      |
| ----- |           |                   |       |                                                                    |
| 7     | 24        | HCl               | rt    | no reaction, starting material re-isolated                         |
| 8     | 24        | HCl               | 80 °C | no reaction, starting material re-isolated                         |
| 9     | 24        | HSbF <sub>6</sub> | rt    | no reaction, starting material re-isolated                         |
| 10    | 24        | HSbF <sub>6</sub> | 80 °C | complex mixture by <sup>1</sup> H NMR; no product detected         |
| 11    | 24        | TfOH              | rt    | no reaction, starting material re-isolated                         |
| 12    | 24        | TfOH              | 80 °C | partial alkyne hydration & starting material by <sup>1</sup> H NMR |
| ----- |           |                   |       |                                                                    |
| 13    | 27        | HCl               | rt    | complex mixture by <sup>1</sup> H NMR; no product detected         |
| 14    | 27        | HCl               | 80 °C | decomposition                                                      |
| 15    | 27        | HSbF <sub>6</sub> | rt    | no reaction, starting material re-isolated                         |
| 16    | 27        | HSbF <sub>6</sub> | 80 °C | partial alkyne hydration & starting material by <sup>1</sup> H NMR |
| 17    | 27        | TfOH              | rt    | no reaction, starting material re-isolated                         |
| 18    | 27        | TfOH              | 80 °C | partial alkyne hydration & starting material by <sup>1</sup> H NMR |

To determine the potential role of trace protic acids as the true hydroarylation catalysts we undertook a screen of the corresponding acids, namely HCl in place of both PtCl<sub>4</sub> and Au(PPh<sub>3</sub>)Cl, and HSbF<sub>6</sub> in place of AgSbF<sub>6</sub>. During our investigations of potential hydroarylation catalysts we also examined Au(PPh<sub>3</sub>)Cl/AgOTf, which we found to be effective, but delivered lower yields than the optimized Au(PPh<sub>3</sub>)Cl/AgSbF<sub>6</sub> catalyst (76% versus 93% for lead substrate **8**). However, this result prompted us to also investigate triflic acid, as a potential hidden acid catalyst. The *in situ* formation of triflic acid from intended metal triflate catalysts has previously been demonstrated in the literature.<sup>1</sup>

The substrates were weighed into glass vials and dissolved in a 1:1 solution of 1,2-dichloroethane:1,4-dioxane, 0.05 M to mimic the normal reaction concentration. Stir bars were added, followed by 0.5 mol % of the appropriate acid via microsyringe (the sources of the acids were: HSbF<sub>6</sub> 65% aqueous solution from Alfa Aesar; HCl 4 M in 1,4-dioxane from Aldrich; neat triflic acid from Aldrich). The introduction of water in the case of the HSbF<sub>6</sub> reactions is of minimal consequence since, a) wet solvent is used for the reaction and b) the reaction has been shown to proceed, when catalyzed by PtCl<sub>4</sub>, in the presence of 5% water in the solvent.

The reactions were setup in duplicate and stirred at both room temperature and 80 °C for 4 hours, after which they were analyzed by TLC and <sup>1</sup>H-NMR. The general conclusion, which can be garnered from the data below, is that trace acids, if indeed present, are not capable of promoting the hydroarylation reaction under the standard reaction conditions (i.e. standard solvent, concentration, temperature and reaction time).

1. Dang, T. T.; Boeck, F.; Hintermann, L. *J. Org. Chem.* **2011**, *76*, 9353-9361.

## X-ray data for Compound 14:

|                                        |                                                                                                                                                |
|----------------------------------------|------------------------------------------------------------------------------------------------------------------------------------------------|
| Compound                               | <b>14</b>                                                                                                                                      |
| Empirical formula                      | C <sub>24</sub> H <sub>24</sub> N <sub>2</sub> O <sub>4</sub>                                                                                  |
| Formula weight                         | 404.17 g/mol                                                                                                                                   |
| Temperature                            | 125(2) K                                                                                                                                       |
| Wavelength                             | 0.71073 Å                                                                                                                                      |
| Crystal system                         | triclinic                                                                                                                                      |
| Space group                            | P1                                                                                                                                             |
| Unit cell dimensions                   | $a = 9.4174(4)$ Å $\alpha = 107.8320(10)^\circ$<br>$b = 10.2417(2)$ Å $\beta = 90.81^\circ$<br>$c = 13.5578(4)$ Å $\gamma = 93.4290(10)^\circ$ |
| Volume, Z                              | 1241.88(8) Å <sup>3</sup> , 2                                                                                                                  |
| Density (calculated)                   | 1.290 Mg/m <sup>3</sup>                                                                                                                        |
| Absorption coefficient                 | 0.086 mm <sup>-1</sup>                                                                                                                         |
| F (000)                                | 512                                                                                                                                            |
| Crystal size                           | 0.20 x 0.10 x 0.10 mm                                                                                                                          |
| $\Theta$ range for data collection     | 1.58 to 32.69°                                                                                                                                 |
| Limiting indices                       | $-14 \leq h \leq 14, -14 \leq k \leq 15, -20 \leq l \leq 20$                                                                                   |
| Reflections collected                  | 21718                                                                                                                                          |
| Independent reflections                | 8503 ( $R_{\text{int}} = 0.0262$ )                                                                                                             |
| Completeness to $\Theta = 32.69^\circ$ | 93.0%                                                                                                                                          |
| Absorption correction                  | EMPIRICAL                                                                                                                                      |
| Max. and min. transmission             | 0.9915 and 0.9830                                                                                                                              |
| Refinement method                      | Full-matrix least-squares on F <sup>2</sup>                                                                                                    |
| Data/restraints/parameters             | 8053 / 0 / 325                                                                                                                                 |
| Goodness-of-fit on F <sup>2</sup>      | 1.031                                                                                                                                          |
| Final R indices [ $I > 2\sigma(I)$ ]   | $R1 = 0.0476, wR2 = 0.1220$                                                                                                                    |
| R indices (all data)                   | $R1 = 0.0673, wR2 = 0.1341$                                                                                                                    |
| Largest diff. peak and hole            | 0.460 and -0.374 eÅ <sup>-3</sup>                                                                                                              |

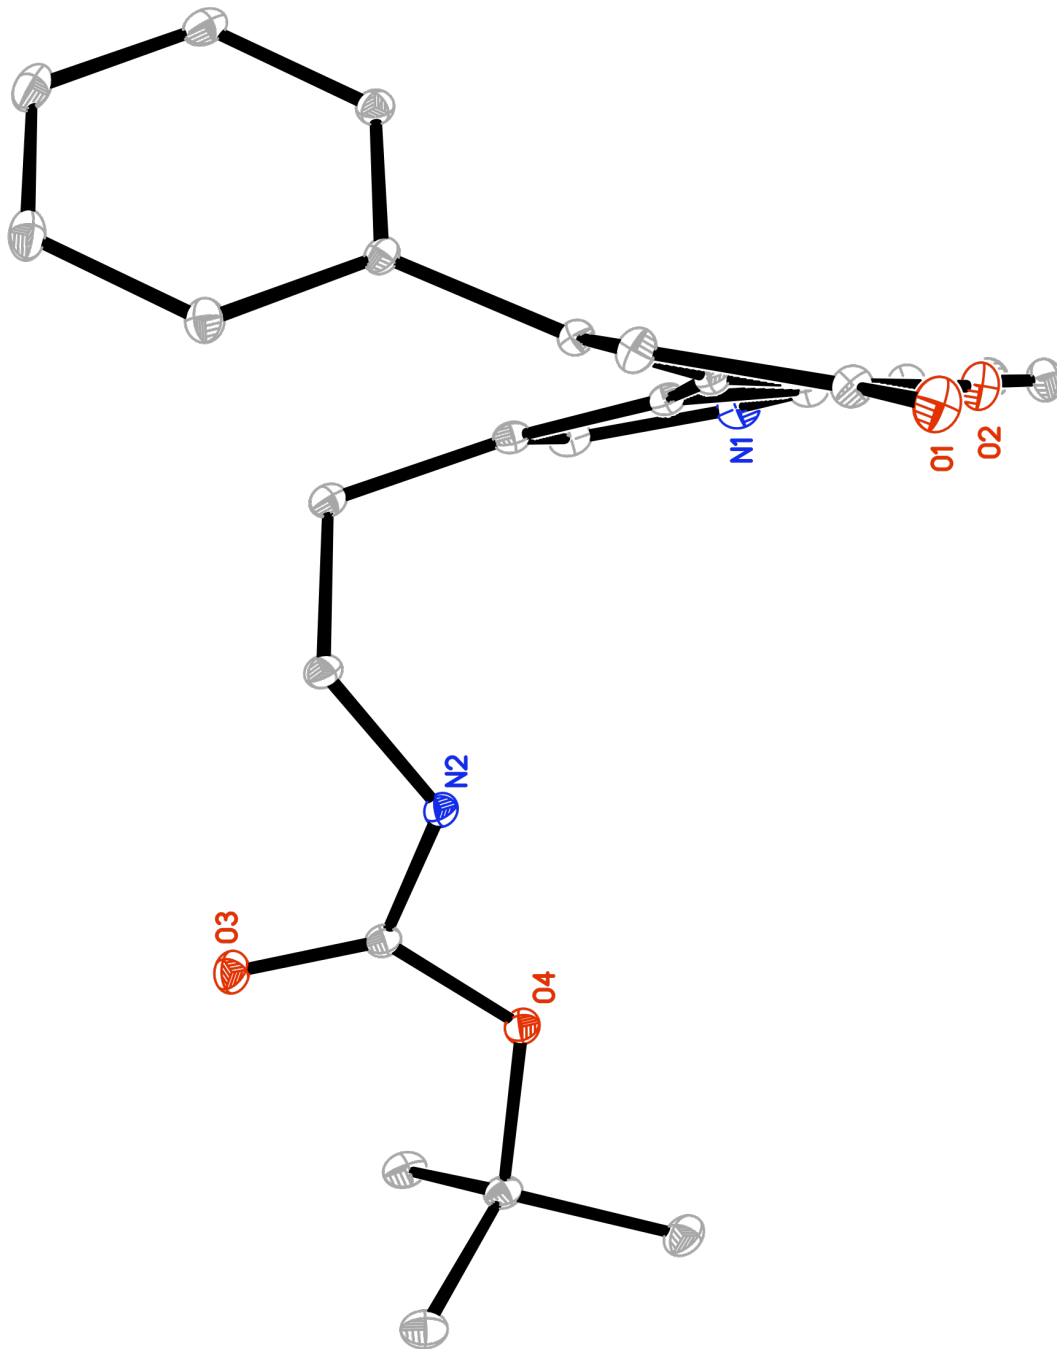

ORTEP of compound 14

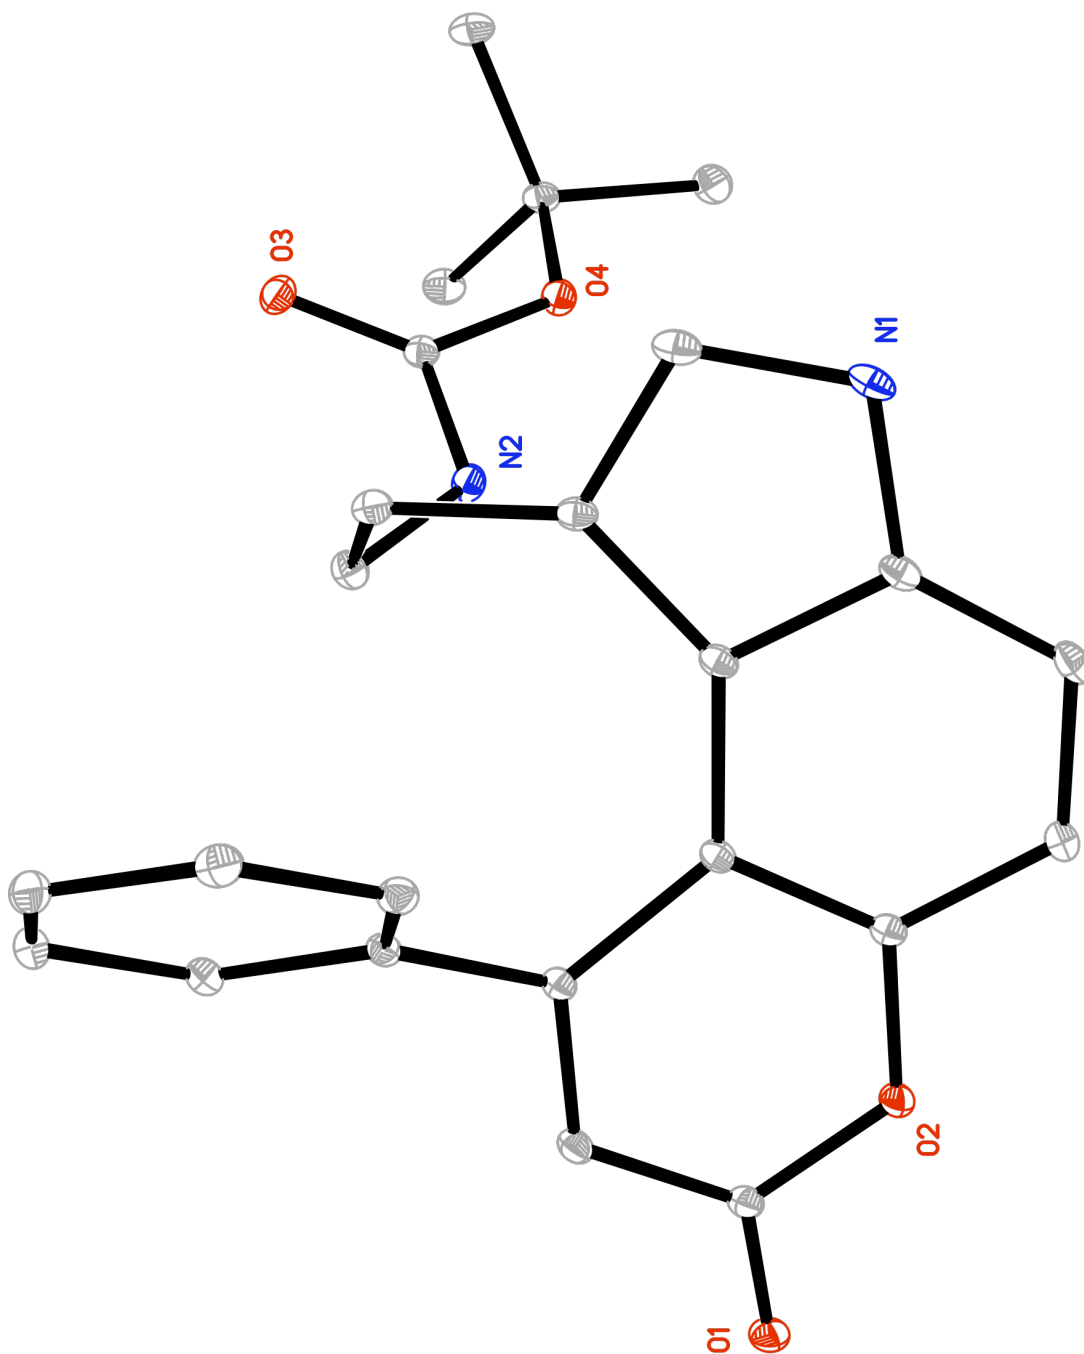

ORTEP of compound 14
